# Supplementary material for: Protein signatures of seminal plasma from bulls with contrasting frozen-thawed sperm viability
Source: PubMed Central journal article supplement (PMC7474054; doi:10.1038/s41598-020-71015-9), 2020-09-04

## **Protein Signatures of Seminal Plasma from Bulls with Contrasting Frozen-Thawed Sperm Viability**

Fabio P. Gomes,

Robin Park,

Arabela G. Viana,

Carolina Fernandez-Costa,

Einko Topper,

Abdullah Kaya,

Erdogan Memili,

John R. Yates, III,

Arlindo A. Moura

**Supplemental Table 3.** Analyses of variance, parameter estimates and fit diagnostics of regression analyses carried out on SAS University Edition, using a stepwise approach. For the regression models (summarized in Table 3), the frozen-thawed sperm viability (freezability score) of bulls was set as the dependent variable and abundances of seminal plasma proteins with the highest VIP scores (as shown in Figure 2), as the independent variables. Q9BGI1L and P29392L: log-transformed abundances of peroxiredoxin-5 (accession # Q9BGI1) and spermadhesin-1 (accession # P29392), respectively. P81019 and P81019L: abundances and log-transformed abundances of BSP5 (accession # P81019).

|                                  |                        |
|----------------------------------|------------------------|
| <b>Data Set</b>                  | WORK.IMPORTPLAN4ANDLOG |
| <b>Dependent Variable</b>        | FreezeScore            |
| <b>Selection Method</b>          | Stepwise               |
| <b>Select Criterion</b>          | SBC                    |
| <b>Stop Criterion</b>            | SBC                    |
| <b>Effect Hierarchy Enforced</b> | None                   |

|                                    |    |
|------------------------------------|----|
| <b>Number of Observations Read</b> | 14 |
| <b>Number of Observations Used</b> | 14 |

| <b>Dimensions</b>           |   |
|-----------------------------|---|
| <b>Number of Effects</b>    | 4 |
| <b>Number of Parameters</b> | 4 |

| <b>Stepwise Selection Summary</b> |                       |                       |                          |            |
|-----------------------------------|-----------------------|-----------------------|--------------------------|------------|
| <b>Step</b>                       | <b>Effect Entered</b> | <b>Effect Removed</b> | <b>Number Effects In</b> | <b>SBC</b> |
| 0                                 | Intercept             |                       | 1                        | 50.0757    |
| 1                                 | Q9BG1L                |                       | 2                        | 42.0419    |
| 2                                 | P29392L               |                       | 3                        | 40.5569    |
| 3                                 | P29392L*P81019L       |                       | 4                        | 36.1779*   |
| * Optimal Value of Criterion      |                       |                       |                          |            |

Selection stopped because all effects are in the final model.

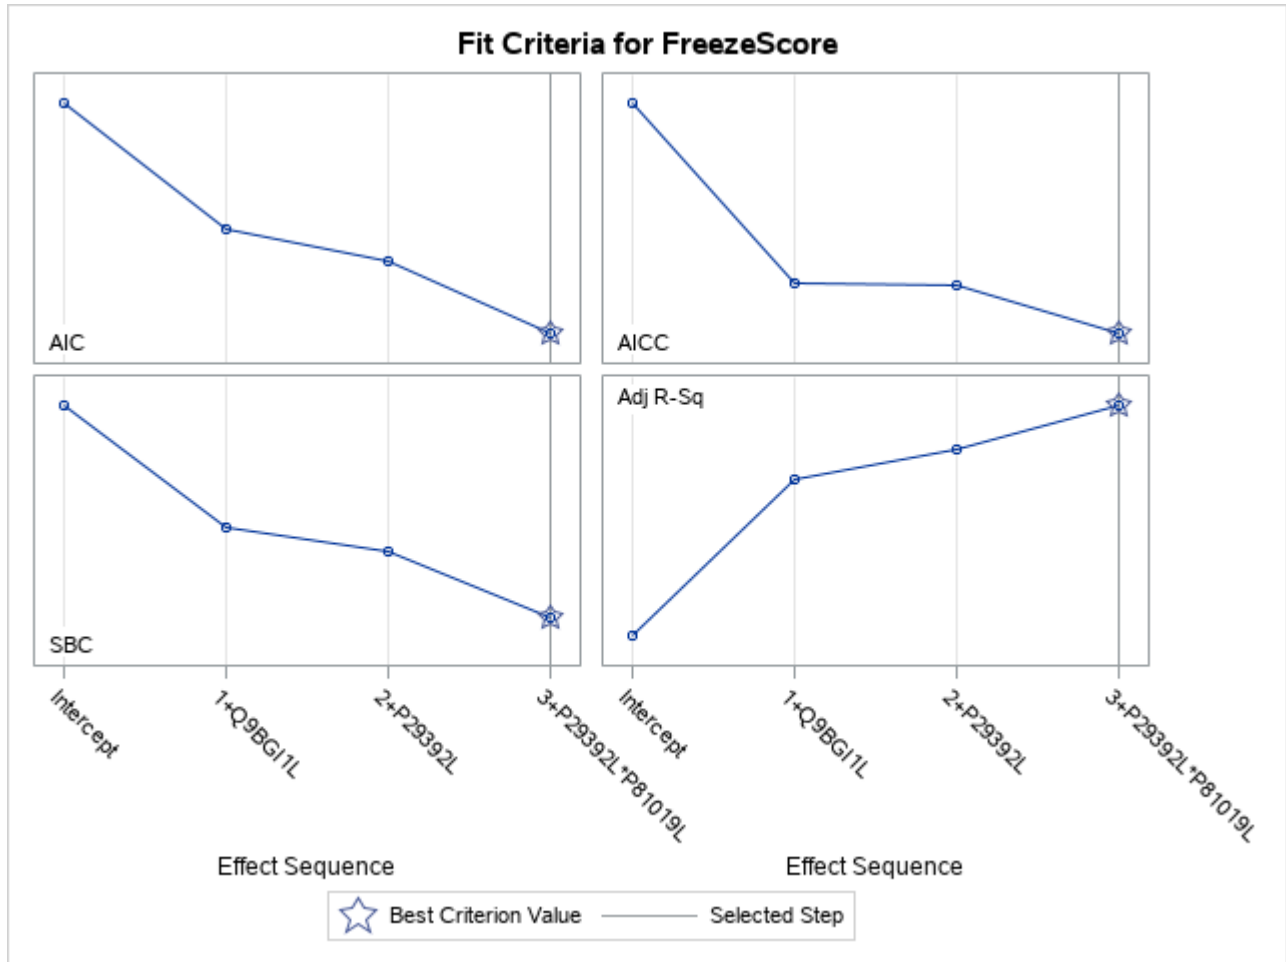

**Selected Model**

The selected model is the model at the last step (Step 3).

**Effects:** Intercept P29392L Q9BG11L P29392L\*P81019L

**Note:** The p-values for parameters and effects are not adjusted for the fact that the terms in the model have been selected and so are generally liberal.

| Analysis of Variance |    |                |             |         |        |
|----------------------|----|----------------|-------------|---------|--------|
| Source               | DF | Sum of Squares | Mean Square | F Value | Pr > F |
| Model                | 3  | 327.34750      | 109.11583   | 12.50   | 0.0010 |
| Error                | 10 | 87.28465       | 8.72846     |         |        |
| Corrected Total      | 13 | 414.63214      |             |         |        |

|                |          |
|----------------|----------|
| Root MSE       | 2.95440  |
| Dependent Mean | 3.53571  |
| R-Square       | 0.7895   |
| Adj R-Sq       | 0.7263   |
| AIC            | 49.62164 |
| AICC           | 57.12164 |
| SBC            | 36.17787 |

| Parameter Estimates |    |          |                |         |         |
|---------------------|----|----------|----------------|---------|---------|
| Parameter           | DF | Estimate | Standard Error | t Value | Pr >  t |
|                     |    |          |                |         |         |

| Parameter Estimates |    |            |                |         |         |
|---------------------|----|------------|----------------|---------|---------|
| Parameter           | DF | Estimate   | Standard Error | t Value | Pr >  t |
| Intercept           | 1  | 221.301878 | 40.724327      | 5.43    | 0.0003  |
| P29392L             | 1  | -30.270225 | 8.902829       | -3.40   | 0.0068  |
| Q9BG1L              | 1  | -7.814084  | 3.166969       | -2.47   | 0.0333  |
| P29392L*P81019L     | 1  | 1.515310   | 0.593961       | 2.55    | 0.0288  |

Model: MODEL1  
Dependent Variable: FreezeScore FreezeScore

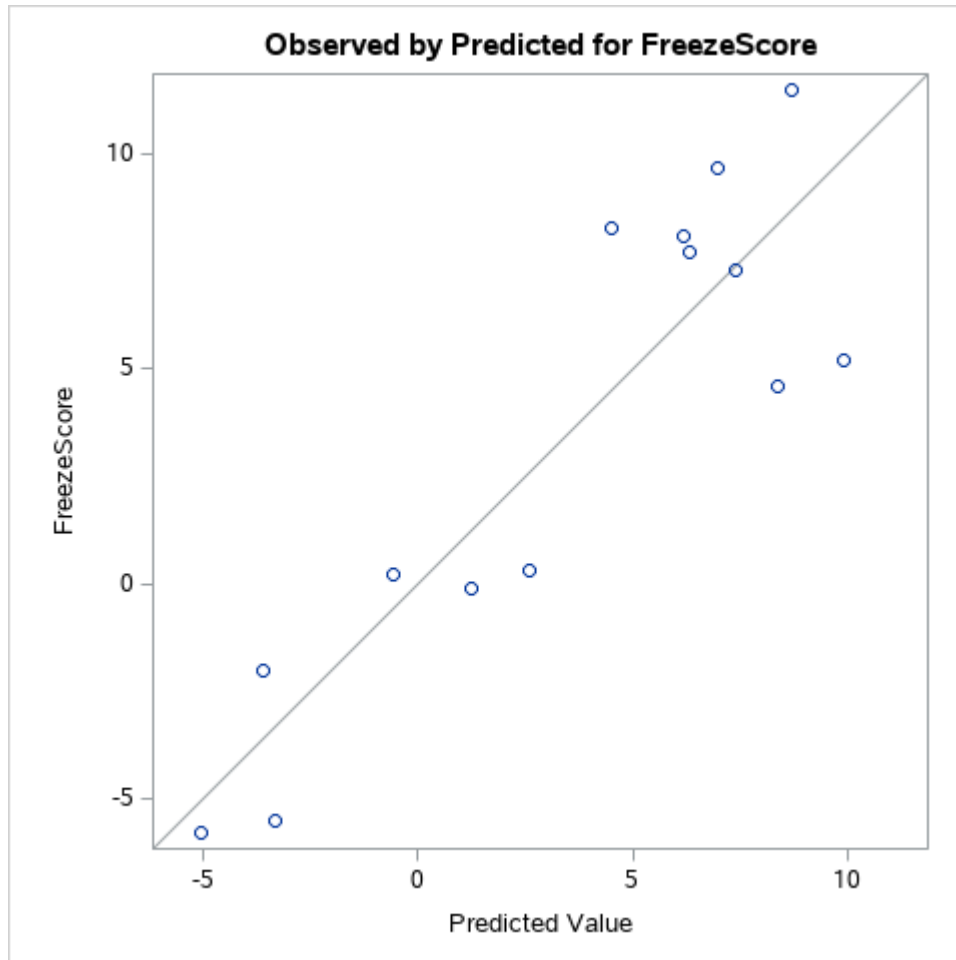

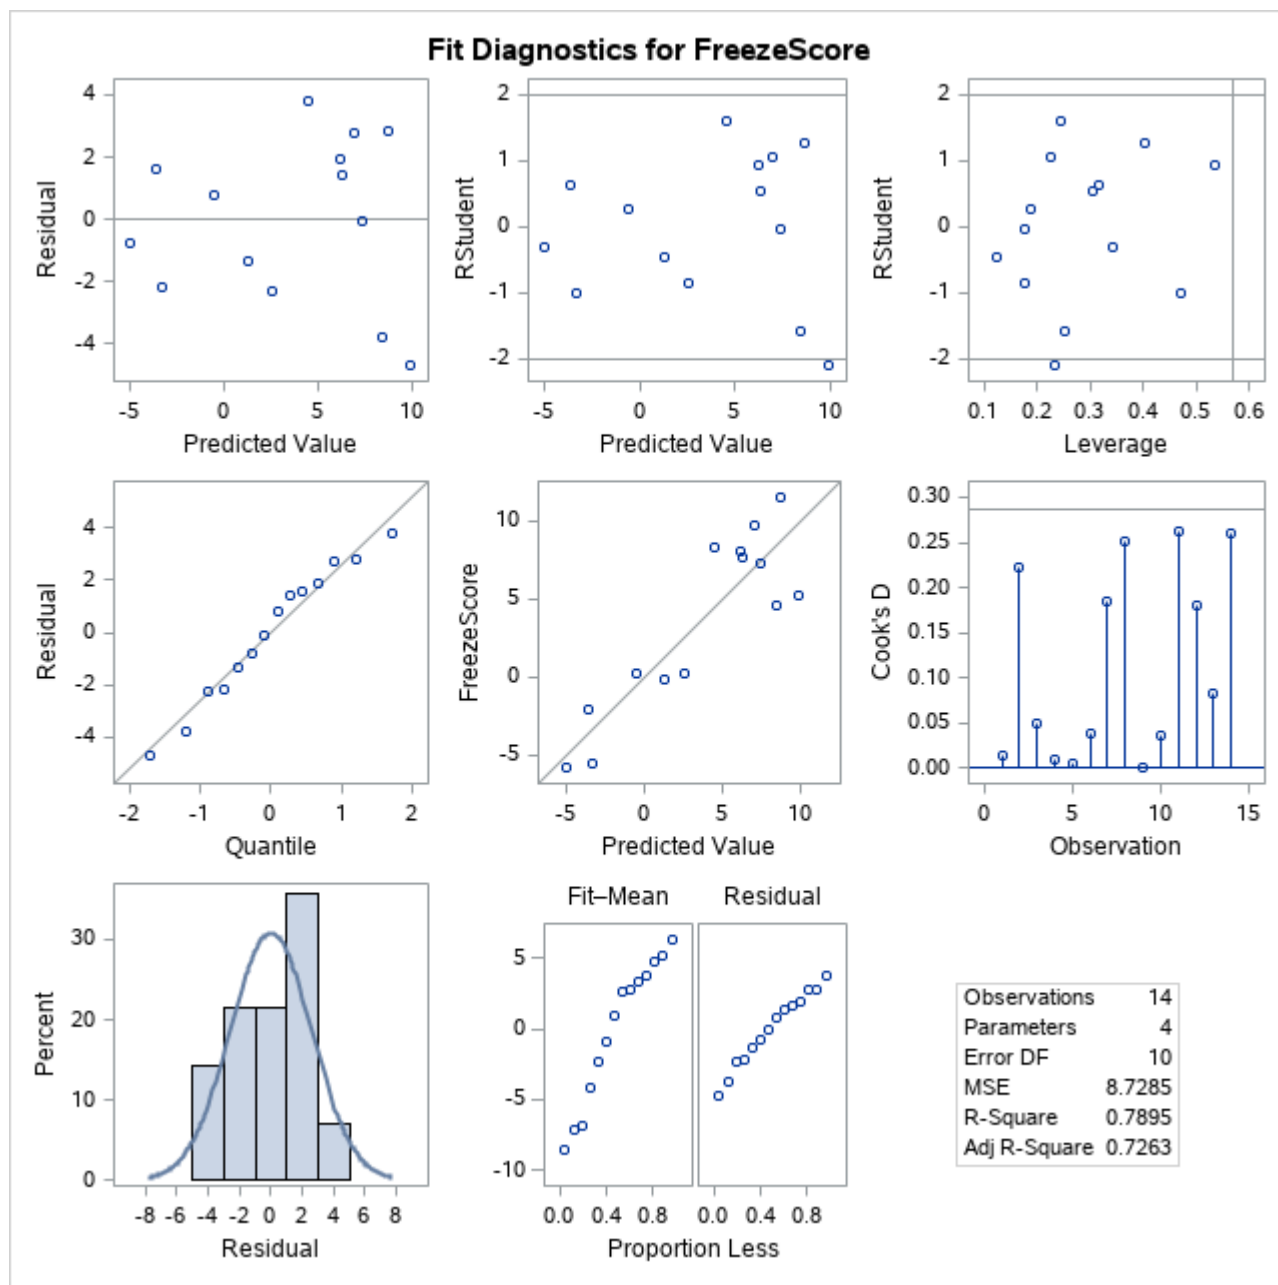

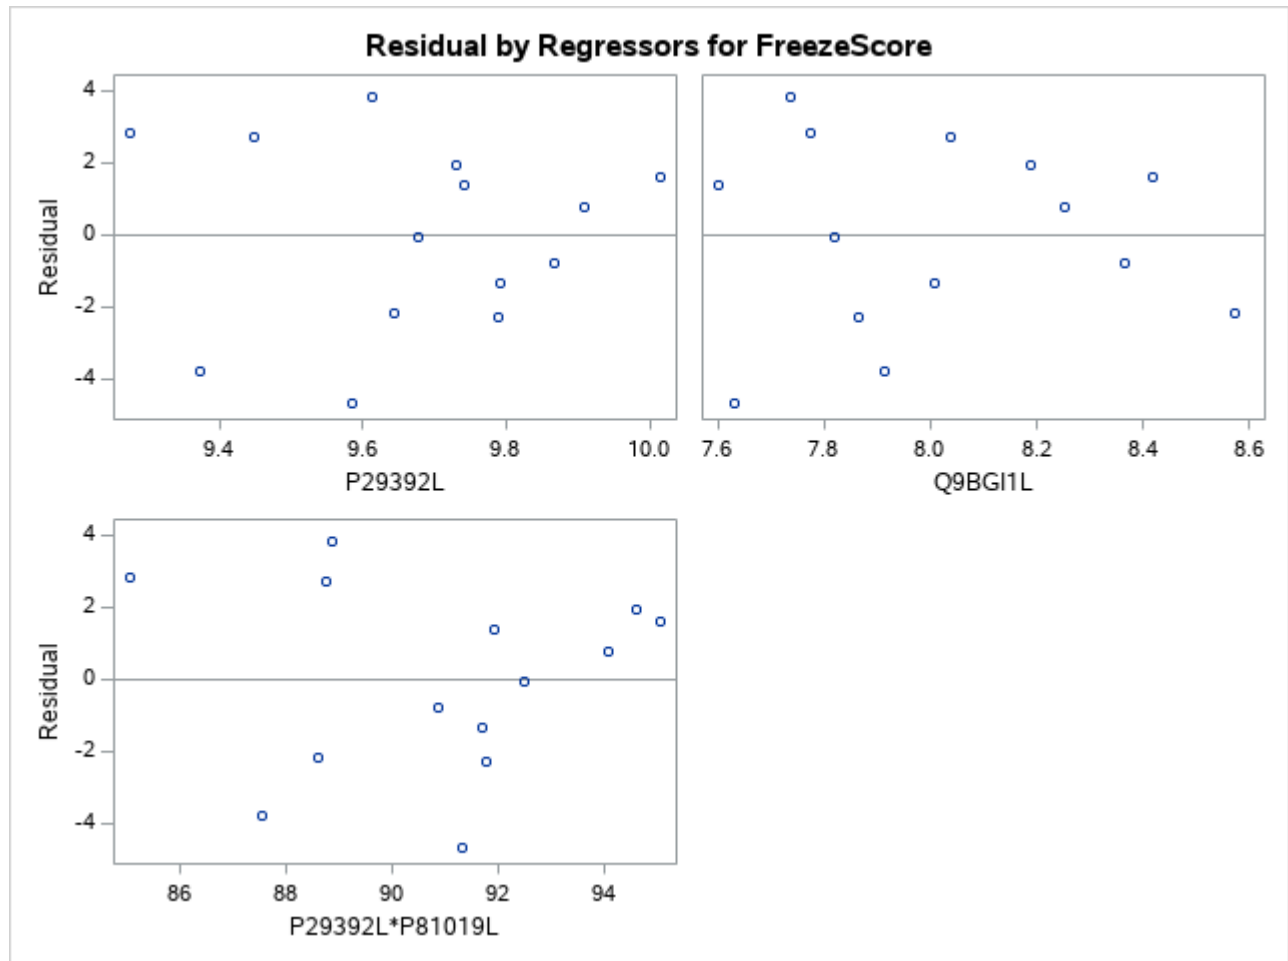

|                                  |                        |
|----------------------------------|------------------------|
| <b>Data Set</b>                  | WORK.IMPORTPLAN4ANDLOG |
| <b>Dependent Variable</b>        | FreezeScore            |
| <b>Selection Method</b>          | Stepwise               |
| <b>Select Criterion</b>          | SBC                    |
| <b>Stop Criterion</b>            | SBC                    |
| <b>Effect Hierarchy Enforced</b> | None                   |

|                                    |    |
|------------------------------------|----|
| <b>Number of Observations Read</b> | 14 |
| <b>Number of Observations Used</b> | 14 |

| <b>Dimensions</b>           |   |
|-----------------------------|---|
| <b>Number of Effects</b>    | 4 |
| <b>Number of Parameters</b> | 4 |

| <b>Stepwise Selection Summary</b> |                       |                       |                          |            |
|-----------------------------------|-----------------------|-----------------------|--------------------------|------------|
| <b>Step</b>                       | <b>Effect Entered</b> | <b>Effect Removed</b> | <b>Number Effects In</b> | <b>SBC</b> |
| 0                                 | Intercept             |                       | 1                        | 50.0757    |
| 1                                 | Q9BGI1L               |                       | 2                        | 42.0419    |
| 2                                 | P29392L               |                       | 3                        | 40.5569    |
| 3                                 | P81019                |                       | 4                        | 35.3358*   |
| * Optimal Value of Criterion      |                       |                       |                          |            |

Selection stopped because all effects are in the final model.

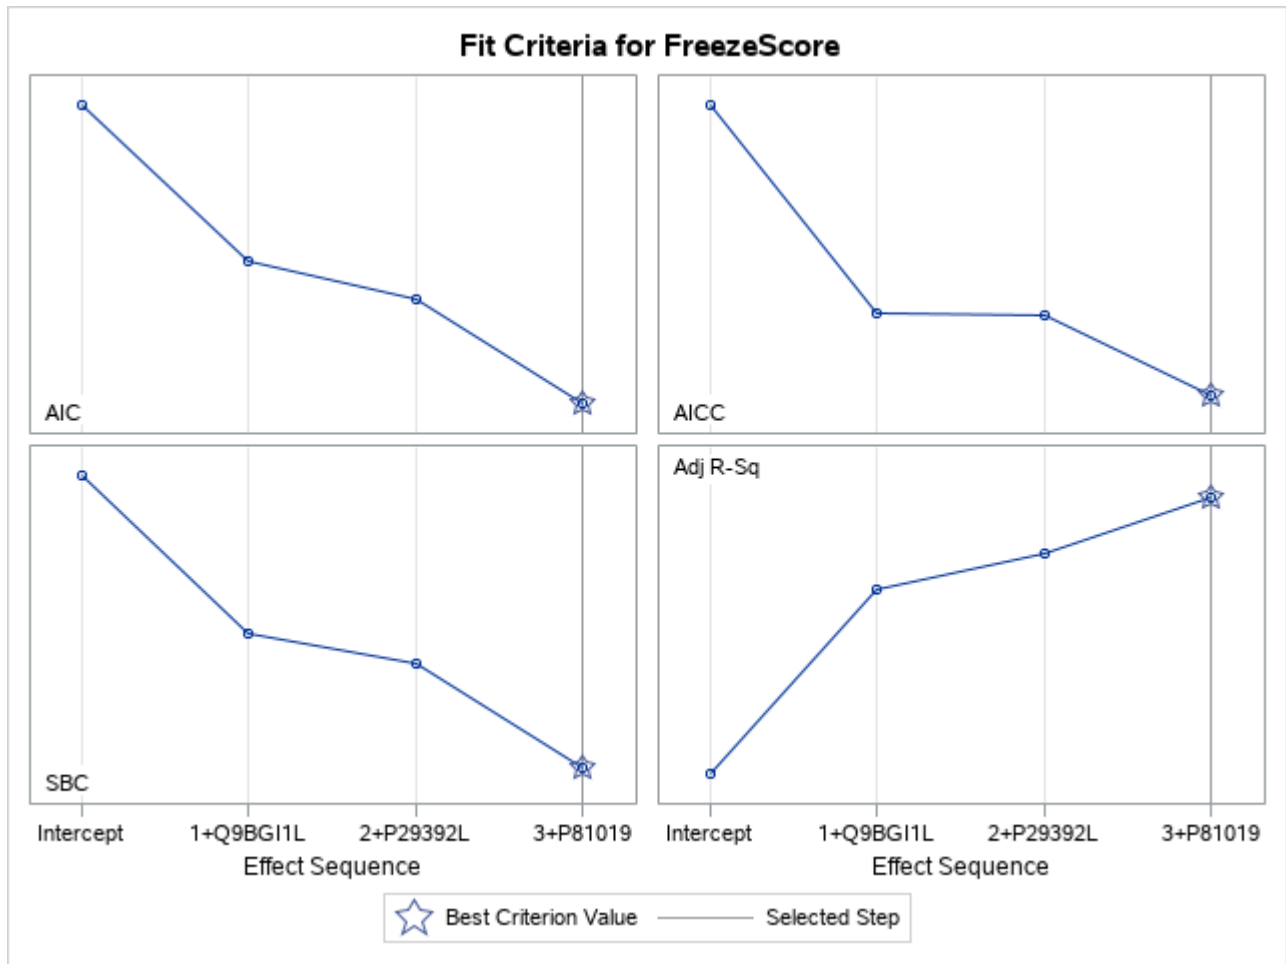

#### Selected Model

The selected model is the model at the last step (Step 3).

**Effects:** Intercept Q9BG11L P81019 P29392L

**Note:** The p-values for parameters and effects are not adjusted for the fact that the terms in the model have been selected and so are generally liberal.

| Analysis of Variance |    |                |             |         |        |
|----------------------|----|----------------|-------------|---------|--------|
| Source               | DF | Sum of Squares | Mean Square | F Value | Pr > F |
| Model                | 3  | 332.44248      | 110.81416   | 13.48   | 0.0008 |
| Error                | 10 | 82.18967       | 8.21897     |         |        |
| Corrected Total      | 13 | 414.63214      |             |         |        |

|                       |          |
|-----------------------|----------|
| <b>Root MSE</b>       | 2.86687  |
| <b>Dependent Mean</b> | 3.53571  |
| <b>R-Square</b>       | 0.8018   |
| <b>Adj R-Sq</b>       | 0.7423   |
| <b>AIC</b>            | 48.77961 |
| <b>AICC</b>           | 56.27961 |
| <b>SBC</b>            | 35.33584 |

| Parameter Estimates |    |          |                |         |         |
|---------------------|----|----------|----------------|---------|---------|
| Parameter           | DF | Estimate | Standard Error | t Value | Pr >  t |
|                     |    |          |                |         |         |



| Parameter Estimates |    |              |                |         |         |
|---------------------|----|--------------|----------------|---------|---------|
| Parameter           | DF | Estimate     | Standard Error | t Value | Pr >  t |
| Intercept           | 1  | 212.062253   | 38.441654      | 5.52    | 0.0003  |
| Q9BG1L              | 1  | -8.614414    | 2.993342       | -2.88   | 0.0164  |
| P81019              | 1  | 2.2628731E-9 | 8.245296E-10   | 2.74    | 0.0207  |
| P29392L             | 1  | -15.033786   | 4.623548       | -3.25   | 0.0087  |

Model: MODEL1  
Dependent Variable: FreezeScore FreezeScore

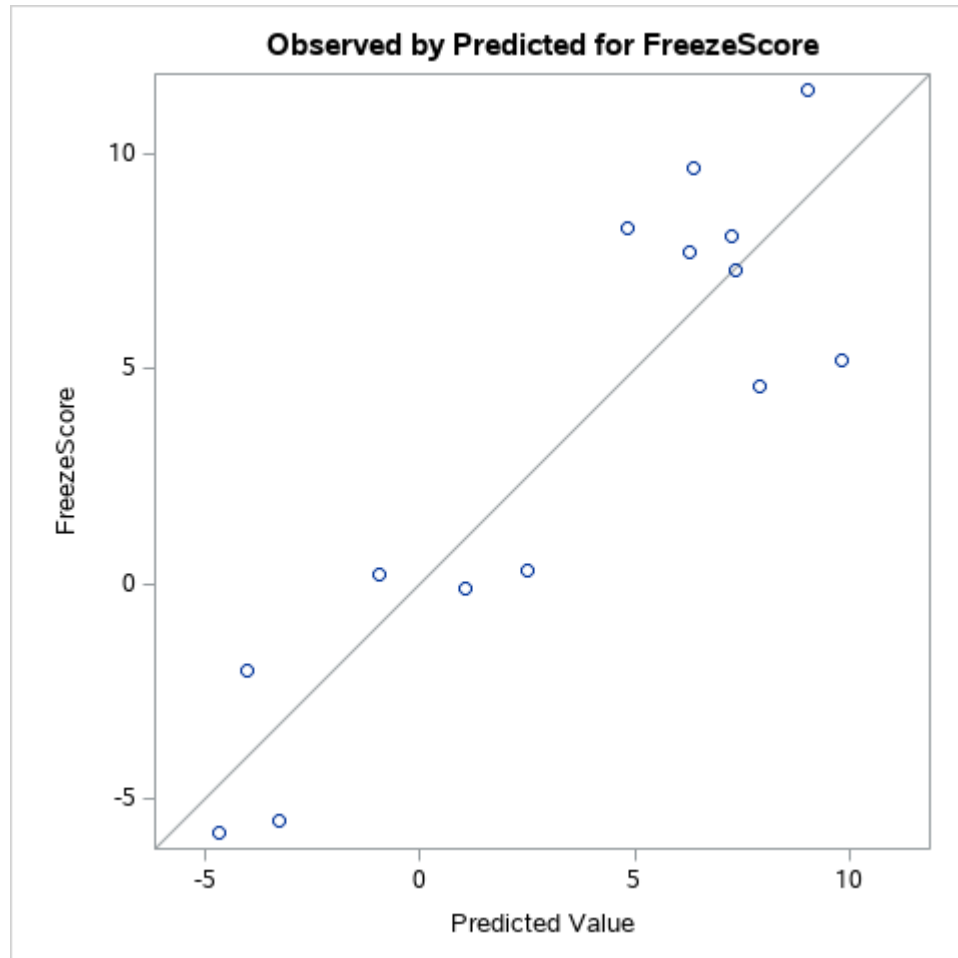

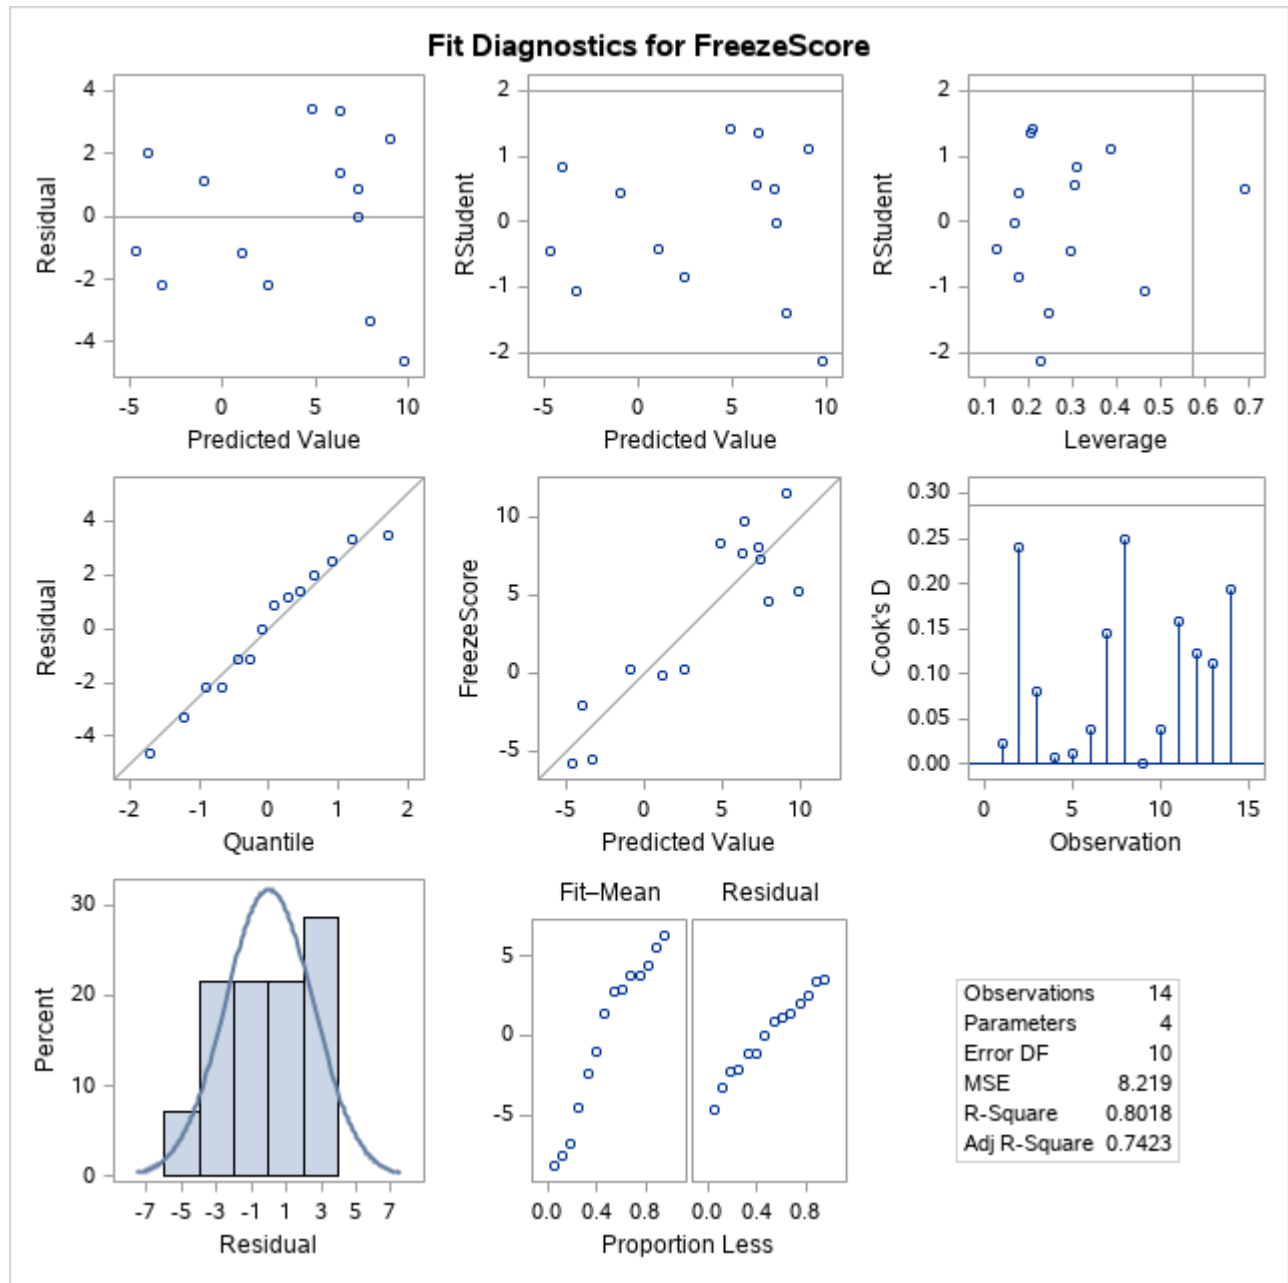

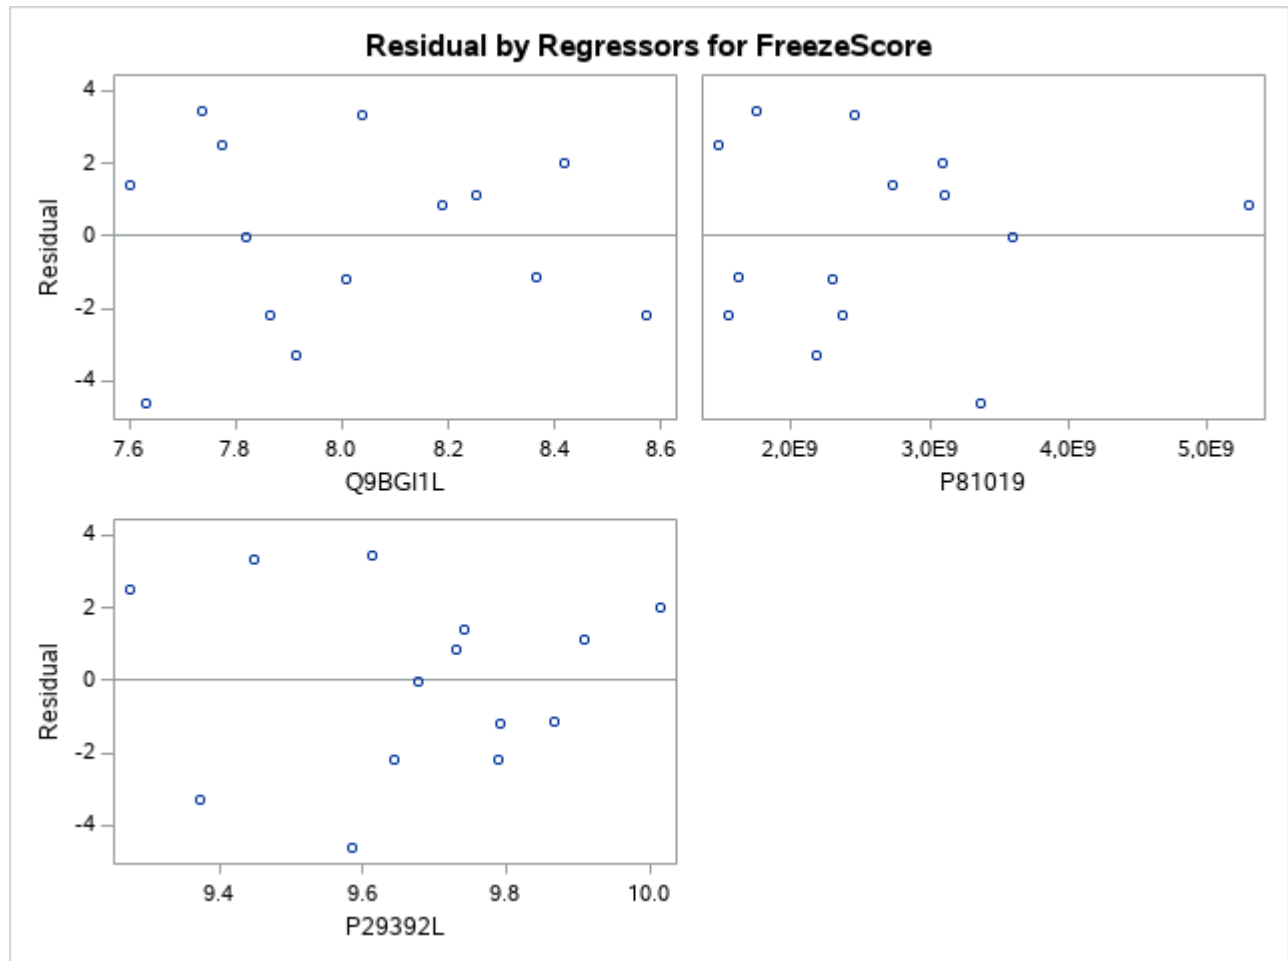

Supplement: 41598_2020_71015_MOESM3_ESM.pdf [file 41598_2020_71015_MOESM3_ESM.pdf]
