# Supplementary material for: Protein signatures of seminal plasma from bulls with contrasting frozen-thawed sperm viability
Source: PubMed Central journal article supplement (PMC7474054; doi:10.1038/s41598-020-71015-9), 2020-09-04
Supplement: 41598_2020_71015_MOESM2_ESM.pdf [file 41598_2020_71015_MOESM2_ESM.pdf]

# Protein Signatures of Seminal Plasma from Bulls with Contrasting Frozen-Thawed Sperm Viability

Fabio P. Gomes, Robin Park, Arabela G. Viana, Carolina Fernandez-Costa, Einko Topper, Abdullah Kaya, Erdogan Memili, John R. Yates, III, Arlindo A. Moura

**Supplemental table 1.** Uniprot accession numbers, gene codes, description, abundances and fold-changes of 1,445 seminal plasma proteins in bulls with low and high sperm freezability phenotypes. Proteins were identified by multidimensional protein identification technology, mass spectrometry and tools of bioinformatics. Proteins differentially expressed ( $p < 0.05$ ) in the seminal plasma of LF and HF bulls are marked with an "X". Relative abundance: the abundance of a specific protein as the percentage of total abundance of all proteins. AVG: average; LF: low sperm freezability; HF: high sperm freezability. Freezability scores: percentage deviation of frozen-thawed sperm viability of each bull relative to the average frozen-thawed sperm viability (54.7  $\pm$  5.4%) measured in the population.

## Functional Annotation Clustering

Current Gene List: List\_1

Current Background: Bos taurus

1407 DAVID IDs

|                          | Annotation Cluster 1 | Enrichment Score: 57.69                                         | G  |  | Count | P_Value  | Benjamini |
|--------------------------|----------------------|-----------------------------------------------------------------|----|--|-------|----------|-----------|
| <input type="checkbox"/> | UP_KEYWORDS          | <a href="#">Mitochondrion</a>                                   | RT |  | 246   | 4.5E-106 | 4.8E-104  |
| <input type="checkbox"/> | UP_KEYWORDS          | <a href="#">Transit peptide</a>                                 | RT |  | 131   | 8.6E-58  | 4.6E-56   |
| <input type="checkbox"/> | UP_SEQ_FEATURE       | transit peptide:Mitochondrion                                   | RT |  | 123   | 2.2E-11  | 6.2E-8    |
|                          | Annotation Cluster 2 | Enrichment Score: 33.93                                         | G  |  | Count | P_Value  | Benjamini |
| <input type="checkbox"/> | UP_KEYWORDS          | <a href="#">Mitochondrion inner membrane</a>                    | RT |  | 102   | 7.2E-60  | 4.4E-58   |
| <input type="checkbox"/> | KEGG_PATHWAY         | <a href="#">Oxidative phosphorylation</a>                       | RT |  | 83    | 3.9E-46  | 1.0E-43   |
| <input type="checkbox"/> | KEGG_PATHWAY         | <a href="#">Parkinson's disease</a>                             | RT |  | 84    | 2.0E-43  | 2.7E-41   |
| <input type="checkbox"/> | UP_KEYWORDS          | <a href="#">Electron transport</a>                              | RT |  | 56    | 2.5E-38  | 8.2E-37   |
| <input type="checkbox"/> | UP_KEYWORDS          | <a href="#">Respiratory chain</a>                               | RT |  | 46    | 2.0E-37  | 6.1E-36   |
| <input type="checkbox"/> | KEGG_PATHWAY         | <a href="#">Huntington's disease</a>                            | RT |  | 83    | 2.1E-31  | 1.4E-29   |
| <input type="checkbox"/> | KEGG_PATHWAY         | <a href="#">Alzheimer's disease</a>                             | RT |  | 78    | 3.0E-31  | 1.6E-29   |
| <input type="checkbox"/> | GOTERM_CC_DIRECT     | <a href="#">mitochondrial respiratory chain complex I</a>       | RT |  | 34    | 7.4E-25  | 8.9E-23   |
| <input type="checkbox"/> | KEGG_PATHWAY         | <a href="#">Non-alcoholic fatty liver disease (NAFLD)</a>       | RT |  | 59    | 3.2E-19  | 9.5E-18   |
| <input type="checkbox"/> | GOTERM_MF_DIRECT     | <a href="#">NADH dehydrogenase (ubiquinone) activity</a>        | RT |  | 22    | 1.3E-14  | 4.6E-12   |
|                          | Annotation Cluster 3 | Enrichment Score: 33.14                                         | G  |  | Count | P_Value  | Benjamini |
| <input type="checkbox"/> | UP_KEYWORDS          | <a href="#">Glycoprotein</a>                                    | RT |  | 305   | 4.4E-87  | 3.7E-85   |
| <input type="checkbox"/> | UP_KEYWORDS          | <a href="#">Secreted</a>                                        | RT |  | 238   | 2.8E-70  | 2.0E-68   |
| <input type="checkbox"/> | UP_KEYWORDS          | <a href="#">Disulfide bond</a>                                  | RT |  | 288   | 2.3E-41  | 8.0E-40   |
| <input type="checkbox"/> | UP_KEYWORDS          | <a href="#">Signal</a>                                          | RT |  | 335   | 4.2E-16  | 5.6E-15   |
| <input type="checkbox"/> | UP_SEQ_FEATURE       | signal peptide                                                  | RT |  | 298   | 5.5E-11  | 7.7E-8    |
| <input type="checkbox"/> | UP_SEQ_FEATURE       | disulfide bond                                                  | RT |  | 236   | 3.6E-7   | 2.0E-4    |
| <input type="checkbox"/> | UP_SEQ_FEATURE       | glycosylation site:N-linked (GlcNac...)                         | RT |  | 254   | 4.2E-4   | 7.4E-2    |
|                          | Annotation Cluster 4 | Enrichment Score: 17.48                                         | G  |  | Count | P_Value  | Benjamini |
| <input type="checkbox"/> | UP_KEYWORDS          | <a href="#">Chaperone</a>                                       | RT |  | 55    | 3.1E-28  | 7.0E-27   |
| <input type="checkbox"/> | GOTERM_MF_DIRECT     | <a href="#">unfolded protein binding</a>                        | RT |  | 26    | 8.9E-14  | 2.4E-11   |
| <input type="checkbox"/> | GOTERM_BP_DIRECT     | <a href="#">protein folding</a>                                 | RT |  | 37    | 1.3E-12  | 7.9E-10   |
|                          | Annotation Cluster 5 | Enrichment Score: 17.21                                         | G  |  | Count | P_Value  | Benjamini |
| <input type="checkbox"/> | UP_KEYWORDS          | <a href="#">Lysosome</a>                                        | RT |  | 50    | 1.2E-26  | 2.5E-25   |
| <input type="checkbox"/> | GOTERM_CC_DIRECT     | <a href="#">lysosome</a>                                        | RT |  | 46    | 4.2E-15  | 2.3E-13   |
| <input type="checkbox"/> | KEGG_PATHWAY         | <a href="#">Lysosome</a>                                        | RT |  | 42    | 4.4E-12  | 1.1E-10   |
|                          | Annotation Cluster 6 | Enrichment Score: 15.03                                         | G  |  | Count | P_Value  | Benjamini |
| <input type="checkbox"/> | GOTERM_MF_DIRECT     | <a href="#">cadherin binding involved in cell-cell adhesion</a> | RT |  | 34    | 4.6E-18  | 2.5E-15   |
| <input type="checkbox"/> | GOTERM_CC_DIRECT     | <a href="#">cell-cell adherens junction</a>                     | RT |  | 36    | 1.2E-14  | 5.1E-13   |
| <input type="checkbox"/> | GOTERM_BP_DIRECT     | <a href="#">cell-cell adhesion</a>                              | RT |  | 31    | 1.4E-14  | 1.1E-11   |
|                          | Annotation Cluster 7 | Enrichment Score: 14.25                                         | G  |  | Count | P_Value  | Benjamini |
| <input type="checkbox"/> | UP_KEYWORDS          | <a href="#">Nucleotide-binding</a>                              | RT |  | 217   | 6.4E-37  | 1.8E-35   |

|                          | Annotation Cluster    | Enrichment Score                                          |          |  | Count | P_Value | Benjamini |
|--------------------------|-----------------------|-----------------------------------------------------------|----------|--|-------|---------|-----------|
| <input type="checkbox"/> | UP_KEYWORDS           | ATP-binding                                               | RT       |  | 137   | 5.4E-16 | 6.7E-15   |
| <input type="checkbox"/> | GOTERM_MF_DIRECT      | ATP binding                                               | RT       |  | 149   | 1.1E-4  | 4.4E-3    |
| <input type="checkbox"/> | UP_SEQ_FEATURE        | nucleotide phosphate-binding region:ATP                   | RT       |  | 64    | 2.8E-2  | 9.2E-1    |
|                          | Annotation Cluster 8  | Enrichment Score: 13.12                                   | <b>G</b> |  | Count | P_Value | Benjamini |
| <input type="checkbox"/> | UP_KEYWORDS           | Tricarboxylic acid cycle                                  | RT       |  | 20    | 1.2E-18 | 1.6E-17   |
| <input type="checkbox"/> | GOTERM_BP_DIRECT      | tricarboxylic acid cycle                                  | RT       |  | 21    | 1.7E-16 | 1.2E-13   |
| <input type="checkbox"/> | KEGG_PATHWAY          | Citrate cycle (TCA cycle)                                 | RT       |  | 22    | 6.9E-15 | 1.9E-13   |
| <input type="checkbox"/> | KEGG_PATHWAY          | 2-Oxocarboxylic acid metabolism                           | RT       |  | 10    | 2.4E-5  | 2.8E-4    |
|                          | Annotation Cluster 9  | Enrichment Score: 10.4                                    | <b>G</b> |  | Count | P_Value | Benjamini |
| <input type="checkbox"/> | KEGG_PATHWAY          | Proteasome                                                | RT       |  | 31    | 2.0E-19 | 6.9E-18   |
| <input type="checkbox"/> | GOTERM_CC_DIRECT      | proteasome accessory complex                              | RT       |  | 13    | 2.2E-12 | 8.3E-11   |
| <input type="checkbox"/> | KEGG_PATHWAY          | Epstein-Barr virus infection                              | RT       |  | 17    | 1.4E-1  | 4.4E-1    |
|                          | Annotation Cluster 10 | Enrichment Score: 9.86                                    | <b>G</b> |  | Count | P_Value | Benjamini |
| <input type="checkbox"/> | KEGG_PATHWAY          | Glycolysis / Gluconeogenesis                              | RT       |  | 28    | 1.5E-11 | 3.1E-10   |
| <input type="checkbox"/> | UP_KEYWORDS           | Glycolysis                                                | RT       |  | 16    | 4.1E-11 | 3.4E-10   |
| <input type="checkbox"/> | GOTERM_BP_DIRECT      | glycolytic process                                        | RT       |  | 15    | 4.1E-9  | 1.6E-6    |
|                          | Annotation Cluster 11 | Enrichment Score: 8.61                                    | <b>G</b> |  | Count | P_Value | Benjamini |
| <input type="checkbox"/> | GOTERM_BP_DIRECT      | negative regulation of endopeptidase activity             | RT       |  | 32    | 1.5E-17 | 2.3E-14   |
| <input type="checkbox"/> | UP_KEYWORDS           | Protease inhibitor                                        | RT       |  | 30    | 7.6E-17 | 1.4E-15   |
| <input type="checkbox"/> | UP_KEYWORDS           | Serine protease inhibitor                                 | RT       |  | 22    | 2.1E-15 | 2.4E-14   |
| <input type="checkbox"/> | GOTERM_CC_DIRECT      | chromaffin granule                                        | RT       |  | 9     | 1.3E-7  | 3.2E-6    |
| <input type="checkbox"/> | GOTERM_MF_DIRECT      | serine-type endopeptidase inhibitor activity              | RT       |  | 25    | 2.9E-7  | 2.4E-5    |
| <input type="checkbox"/> | SMART                 | SERPIN                                                    | RT       |  | 15    | 5.3E-7  | 4.6E-5    |
| <input type="checkbox"/> | INTERPRO              | Protease inhibitor I4, serpin, conserved site             | RT       |  | 15    | 7.1E-7  | 1.9E-4    |
| <input type="checkbox"/> | INTERPRO              | Serpin domain                                             | RT       |  | 15    | 3.9E-6  | 5.6E-4    |
| <input type="checkbox"/> | INTERPRO              | Serpin family                                             | RT       |  | 15    | 3.9E-6  | 5.6E-4    |
| <input type="checkbox"/> | UP_SEQ_FEATURE        | site:Reactive bond                                        | RT       |  | 9     | 1.7E-2  | 8.1E-1    |
|                          | Annotation Cluster 12 | Enrichment Score: 8.52                                    | <b>G</b> |  | Count | P_Value | Benjamini |
| <input type="checkbox"/> | UP_KEYWORDS           | Proteasome                                                | RT       |  | 37    | 3.5E-30 | 8.8E-29   |
| <input type="checkbox"/> | KEGG_PATHWAY          | Proteasome                                                | RT       |  | 31    | 2.0E-19 | 6.9E-18   |
| <input type="checkbox"/> | GOTERM_CC_DIRECT      | proteasome core complex                                   | RT       |  | 15    | 1.1E-11 | 3.7E-10   |
| <input type="checkbox"/> | UP_KEYWORDS           | Threonine protease                                        | RT       |  | 14    | 2.6E-11 | 2.2E-10   |
| <input type="checkbox"/> | INTERPRO              | Proteasome, subunit alpha/beta                            | RT       |  | 14    | 1.0E-10 | 1.1E-7    |
| <input type="checkbox"/> | GOTERM_MF_DIRECT      | threonine-type endopeptidase activity                     | RT       |  | 14    | 2.6E-9  | 2.8E-7    |
| <input type="checkbox"/> | SMART                 | SM00948                                                   | RT       |  | 7     | 2.5E-6  | 1.2E-4    |
| <input type="checkbox"/> | INTERPRO              | Proteasome A-type subunit                                 | RT       |  | 7     | 6.7E-6  | 8.3E-4    |
| <input type="checkbox"/> | INTERPRO              | Proteasome, alpha-subunit, N-terminal domain              | RT       |  | 7     | 6.7E-6  | 8.3E-4    |
| <input type="checkbox"/> | GOTERM_CC_DIRECT      | proteasome core complex, alpha-subunit complex            | RT       |  | 7     | 1.0E-5  | 2.0E-4    |
| <input type="checkbox"/> | INTERPRO              | Proteasome, beta-type subunit, conserved site             | RT       |  | 8     | 1.2E-5  | 1.3E-3    |
| <input type="checkbox"/> | INTERPRO              | Proteasome B-type subunit                                 | RT       |  | 7     | 8.9E-5  | 8.1E-3    |
| <input type="checkbox"/> | INTERPRO              | Peptidase T1A, proteasome beta-subunit                    | RT       |  | 3     | 1.0E-1  | 9.0E-1    |
| <input type="checkbox"/> | GOTERM_CC_DIRECT      | cytoplasmic mRNA processing body                          | RT       |  | 4     | 9.0E-1  | 1.0E0     |
|                          | Annotation Cluster 13 | Enrichment Score: 7.52                                    | <b>G</b> |  | Count | P_Value | Benjamini |
| <input type="checkbox"/> | UP_KEYWORDS           | Hydrogen ion transport                                    | RT       |  | 27    | 1.3E-19 | 2.0E-18   |
| <input type="checkbox"/> | GOTERM_MF_DIRECT      | proton-transporting ATPase activity, rotational mechanism | RT       |  | 14    | 1.2E-8  | 1.2E-6    |
| <input type="checkbox"/> | GOTERM_BP_DIRECT      | ATP hydrolysis coupled proton transport                   | RT       |  | 15    | 8.7E-8  | 2.7E-5    |
| <input type="checkbox"/> | KEGG_PATHWAY          | Collecting duct acid secretion                            | RT       |  | 12    | 3.2E-5  | 3.7E-4    |
| <input type="checkbox"/> | KEGG_PATHWAY          | Synaptic vesicle cycle                                    | RT       |  | 18    | 1.3E-4  | 1.3E-3    |
| <input type="checkbox"/> | KEGG_PATHWAY          | Rheumatoid arthritis                                      | RT       |  | 21    | 1.2E-3  | 9.6E-3    |
|                          | Annotation Cluster 14 | Enrichment Score: 7.01                                    | <b>G</b> |  | Count | P_Value | Benjamini |
| <input type="checkbox"/> | UP_KEYWORDS           | Hydrogen ion transport                                    | RT       |  | 27    | 1.3E-19 | 2.0E-18   |
| <input type="checkbox"/> | GOTERM_CC_DIRECT      | mitochondrial proton-transporting ATP synthase complex    | RT       |  | 15    | 3.2E-11 | 1.0E-9    |

| Annotation Cluster 1     |                  | Enrichment Score: 57.69                                                                      | <b>G</b> |     | Count | P_Value | Benjamini |
|--------------------------|------------------|----------------------------------------------------------------------------------------------|----------|---------------------------------------------------------------------------------------|-------|---------|-----------|
| <input type="checkbox"/> | UP_KEYWORDS      | <a href="#">ATP synthesis</a>                                                                | RT       |      | 12    | 2.1E-10 | 1.7E-9    |
| <input type="checkbox"/> | GOTERM_BP_DIRECT | <a href="#">ATP synthesis coupled proton transport</a>                                       | RT       |      | 14    | 2.7E-9  | 1.2E-6    |
| <input type="checkbox"/> | UP_KEYWORDS      | <a href="#">CF(0)</a>                                                                        | RT       |      | 9     | 5.5E-7  | 3.2E-6    |
| <input type="checkbox"/> | GOTERM_MF_DIRECT | <a href="#">proton-transporting ATP synthase activity, rotational mechanism</a>              | RT       |      | 9     | 8.0E-6  | 4.8E-4    |
| <input type="checkbox"/> | GOTERM_MF_DIRECT | <a href="#">hydrogen ion transmembrane transporter activity</a>                              | RT       |      | 9     | 8.4E-5  | 3.9E-3    |
| <input type="checkbox"/> | GOTERM_CC_DIRECT | <a href="#">mitochondrial proton-transporting ATP synthase complex, coupling factor F(0)</a> | RT       |      | 6     | 4.7E-4  | 6.7E-3    |
| <input type="checkbox"/> | UP_KEYWORDS      | <a href="#">CF(1)</a>                                                                        | RT       |      | 4     | 8.2E-3  | 2.5E-2    |
| <input type="checkbox"/> | GOTERM_CC_DIRECT | <a href="#">proton-transporting ATP synthase complex, catalytic core F(1)</a>                | RT       |      | 3     | 2.1E-2  | 1.7E-1    |
| Annotation Cluster 15    |                  | Enrichment Score: 6.51                                                                       | <b>G</b> |    | Count | P_Value | Benjamini |
| <input type="checkbox"/> | UP_KEYWORDS      | <a href="#">GTP-binding</a>                                                                  | RT       |      | 68    | 1.9E-21 | 3.3E-20   |
| <input type="checkbox"/> | UP_KEYWORDS      | <a href="#">Prenylation</a>                                                                  | RT       |      | 26    | 2.1E-11 | 1.9E-10   |
| <input type="checkbox"/> | GOTERM_MF_DIRECT | <a href="#">GTP binding</a>                                                                  | RT       |      | 72    | 2.5E-11 | 4.5E-9    |
| <input type="checkbox"/> | GOTERM_MF_DIRECT | <a href="#">GTPase activity</a>                                                              | RT       |      | 46    | 5.4E-11 | 8.4E-9    |
| <input type="checkbox"/> | INTERPRO         | <a href="#">Small GTP-binding protein domain</a>                                             | RT       |      | 33    | 3.5E-7  | 1.2E-4    |
| <input type="checkbox"/> | GOTERM_MF_DIRECT | <a href="#">GDP binding</a>                                                                  | RT       |      | 16    | 2.7E-6  | 2.0E-4    |
| <input type="checkbox"/> | UP_SEQ_FEATURE   | nucleotide phosphate-binding region:GTP                                                      | RT       |      | 61    | 3.5E-5  | 9.7E-3    |
| <input type="checkbox"/> | UP_SEQ_FEATURE   | propeptide:Removed in mature form                                                            | RT       |      | 37    | 8.3E-5  | 2.1E-2    |
| <input type="checkbox"/> | UP_SEQ_FEATURE   | short sequence motif:Effector region                                                         | RT       |      | 19    | 1.5E-3  | 1.9E-1    |
| <input type="checkbox"/> | INTERPRO         | <a href="#">Small GTPase superfamily</a>                                                     | RT       |      | 21    | 2.9E-3  | 1.3E-1    |
| <input type="checkbox"/> | INTERPRO         | <a href="#">P-loop containing nucleoside triphosphate hydrolase</a>                          | RT       |      | 88    | 5.2E-3  | 1.9E-1    |
| <input type="checkbox"/> | UP_SEQ_FEATURE   | lipid moiety-binding region:S-geranylgeranyl cysteine                                        | RT       |      | 20    | 5.6E-3  | 4.8E-1    |
| <input type="checkbox"/> | GOTERM_BP_DIRECT | <a href="#">small GTPase mediated signal transduction</a>                                    | RT       |      | 29    | 1.3E-2  | 4.4E-1    |
| Annotation Cluster 16    |                  | Enrichment Score: 6.38                                                                       | <b>G</b> |    | Count | P_Value | Benjamini |
| <input type="checkbox"/> | UP_KEYWORDS      | <a href="#">Lipid metabolism</a>                                                             | RT       |     | 55    | 1.1E-14 | 1.1E-13   |
| <input type="checkbox"/> | UP_KEYWORDS      | <a href="#">Fatty acid metabolism</a>                                                        | RT       |    | 23    | 7.4E-10 | 5.8E-9    |
| <input type="checkbox"/> | UP_KEYWORDS      | <a href="#">Lipid biosynthesis</a>                                                           | RT       |    | 20    | 3.9E-5  | 1.8E-4    |
| <input type="checkbox"/> | UP_KEYWORDS      | <a href="#">Fatty acid biosynthesis</a>                                                      | RT       |    | 11    | 6.9E-4  | 2.5E-3    |
| <input type="checkbox"/> | GOTERM_BP_DIRECT | <a href="#">fatty acid biosynthetic process</a>                                              | RT       |    | 7     | 5.7E-2  | 8.3E-1    |
| Annotation Cluster 17    |                  | Enrichment Score: 5.76                                                                       | <b>G</b> |  | Count | P_Value | Benjamini |
| <input type="checkbox"/> | GOTERM_BP_DIRECT | <a href="#">mitochondrial electron transport, ubiquinol to cytochrome c</a>                  | RT       |    | 11    | 2.6E-8  | 9.0E-6    |
| <input type="checkbox"/> | GOTERM_CC_DIRECT | <a href="#">mitochondrial respiratory chain complex III</a>                                  | RT       |    | 9     | 1.3E-7  | 3.2E-6    |
| <input type="checkbox"/> | GOTERM_BP_DIRECT | <a href="#">aerobic respiration</a>                                                          | RT       |    | 9     | 1.6E-3  | 1.1E-1    |
| Annotation Cluster 18    |                  | Enrichment Score: 5.41                                                                       | <b>G</b> |  | Count | P_Value | Benjamini |
| <input type="checkbox"/> | UP_KEYWORDS      | <a href="#">Immunity</a>                                                                     | RT       |    | 37    | 7.2E-9  | 5.5E-8    |
| <input type="checkbox"/> | UP_KEYWORDS      | <a href="#">Innate immunity</a>                                                              | RT       |    | 27    | 2.5E-8  | 1.8E-7    |
| <input type="checkbox"/> | GOTERM_BP_DIRECT | <a href="#">innate immune response</a>                                                       | RT       |    | 24    | 3.2E-1  | 1.0E0     |
| Annotation Cluster 19    |                  | Enrichment Score: 5.34                                                                       | <b>G</b> |  | Count | P_Value | Benjamini |
| <input type="checkbox"/> | UP_KEYWORDS      | <a href="#">Blood coagulation</a>                                                            | RT       |    | 14    | 3.7E-7  | 2.2E-6    |
| <input type="checkbox"/> | UP_KEYWORDS      | <a href="#">Hemostasis</a>                                                                   | RT       |    | 14    | 3.7E-7  | 2.2E-6    |
| <input type="checkbox"/> | KEGG_PATHWAY     | <a href="#">Complement and coagulation cascades</a>                                          | RT       |    | 24    | 6.0E-7  | 1.0E-5    |
| <input type="checkbox"/> | GOTERM_BP_DIRECT | <a href="#">blood coagulation</a>                                                            | RT       |    | 12    | 5.3E-3  | 2.5E-1    |
| Annotation Cluster 20    |                  | Enrichment Score: 4.89                                                                       | <b>G</b> |  | Count | P_Value | Benjamini |
| <input type="checkbox"/> | SMART            | <a href="#">ACTIN</a>                                                                        | RT       |    | 14    | 2.9E-9  | 1.0E-6    |
| <input type="checkbox"/> | INTERPRO         | <a href="#">Actin-related protein</a>                                                        | RT       |    | 14    | 2.3E-8  | 1.6E-5    |
| <input type="checkbox"/> | UP_KEYWORDS      | <a href="#">Oxidation</a>                                                                    | RT       |    | 10    | 6.2E-8  | 4.2E-7    |
| <input type="checkbox"/> | INTERPRO         | <a href="#">Actin/actin-like conserved site</a>                                              | RT       |    | 9     | 2.3E-7  | 9.9E-5    |
| <input type="checkbox"/> | INTERPRO         | <a href="#">Actin, conserved site</a>                                                        | RT       |    | 7     | 8.9E-5  | 8.1E-3    |
| <input type="checkbox"/> | GOTERM_BP_DIRECT | <a href="#">mesenchyme migration</a>                                                         | RT       |    | 4     | 6.5E-3  | 2.9E-1    |
| <input type="checkbox"/> | UP_KEYWORDS      | <a href="#">Muscle protein</a>                                                               | RT       |    | 7     | 2.0E-2  | 5.4E-2    |
| <input type="checkbox"/> | GOTERM_BP_DIRECT | <a href="#">skeletal muscle thin filament assembly</a>                                       | RT       |    | 3     | 6.8E-2  | 8.7E-1    |
| Annotation Cluster 21    |                  | Enrichment Score: 4.57                                                                       | <b>G</b> |  | Count | P_Value | Benjamini |
| <input type="checkbox"/> | UP_KEYWORDS      | <a href="#">Microtubule</a>                                                                  | RT       |    | 31    | 2.2E-8  | 1.6E-7    |

| Annotation Cluster 1     |                  | Enrichment Score: 57.69                                          |                    | <b>G</b>                                                                            |     | Count | P_Value | Benjamini |
|--------------------------|------------------|------------------------------------------------------------------|--------------------|-------------------------------------------------------------------------------------|---------------------------------------------------------------------------------------|-------|---------|-----------|
| <input type="checkbox"/> | SMART            | <a href="#">SM00865</a>                                          | <a href="#">RT</a> |    |                                                                                       | 11    | 3.8E-7  | 6.5E-5    |
| <input type="checkbox"/> | SMART            | <a href="#">SM00864</a>                                          | <a href="#">RT</a> |    |                                                                                       | 11    | 1.1E-6  | 6.2E-5    |
| <input type="checkbox"/> | GOTERM_BP_DIRECT | <a href="#">microtubule-based process</a>                        | <a href="#">RT</a> |    |                                                                                       | 15    | 1.3E-6  | 3.0E-4    |
| <input type="checkbox"/> | INTERPRO         | <a href="#">Tubulin/FtsZ, 2-layer sandwich domain</a>            | <a href="#">RT</a> |    |                                                                                       | 11    | 1.8E-6  | 4.1E-4    |
| <input type="checkbox"/> | INTERPRO         | <a href="#">Tubulin, C-terminal</a>                              | <a href="#">RT</a> |    |                                                                                       | 11    | 3.0E-6  | 5.3E-4    |
| <input type="checkbox"/> | INTERPRO         | <a href="#">Tubulin, conserved site</a>                          | <a href="#">RT</a> |    |                                                                                       | 11    | 3.0E-6  | 5.3E-4    |
| <input type="checkbox"/> | INTERPRO         | <a href="#">Tubulin</a>                                          | <a href="#">RT</a> |    |                                                                                       | 11    | 4.9E-6  | 6.5E-4    |
| <input type="checkbox"/> | INTERPRO         | <a href="#">Tubulin/FtsZ, C-terminal</a>                         | <a href="#">RT</a> |    |                                                                                       | 11    | 4.9E-6  | 6.5E-4    |
| <input type="checkbox"/> | GOTERM_MF_DIRECT | <a href="#">structural constituent of cytoskeleton</a>           | <a href="#">RT</a> |    |                                                                                       | 18    | 5.3E-6  | 3.4E-4    |
| <input type="checkbox"/> | INTERPRO         | <a href="#">Tubulin/FtsZ, GTPase domain</a>                      | <a href="#">RT</a> |    |                                                                                       | 11    | 7.8E-6  | 8.7E-4    |
| <input type="checkbox"/> | INTERPRO         | <a href="#">Beta tubulin, autoregulation binding site</a>        | <a href="#">RT</a> |    |                                                                                       | 6     | 3.3E-4  | 2.3E-2    |
| <input type="checkbox"/> | INTERPRO         | <a href="#">Beta tubulin</a>                                     | <a href="#">RT</a> |    |                                                                                       | 6     | 3.3E-4  | 2.3E-2    |
| <input type="checkbox"/> | INTERPRO         | <a href="#">Alpha tubulin</a>                                    | <a href="#">RT</a> |    |                                                                                       | 5     | 6.0E-3  | 2.1E-1    |
| <input type="checkbox"/> | GOTERM_BP_DIRECT | <a href="#">cytoskeleton organization</a>                        | <a href="#">RT</a> |    |                                                                                       | 15    | 7.0E-3  | 3.0E-1    |
| <input type="checkbox"/> | KEGG_PATHWAY     | <a href="#">Gap junction</a>                                     | <a href="#">RT</a> |    |                                                                                       | 18    | 7.7E-3  | 5.4E-2    |
| <input type="checkbox"/> | UP_SEQ_FEATURE   | site:Involved in polymerization                                  | <a href="#">RT</a> |    |                                                                                       | 4     | 3.0E-1  | 1.0E0     |
| Annotation Cluster 22    |                  | Enrichment Score: 4.42                                           |                    | <b>G</b>                                                                            |    | Count | P_Value | Benjamini |
| <input type="checkbox"/> | UP_KEYWORDS      | <a href="#">Spermatogenesis</a>                                  | <a href="#">RT</a> |    |                                                                                       | 18    | 1.8E-7  | 1.1E-6    |
| <input type="checkbox"/> | UP_KEYWORDS      | <a href="#">Differentiation</a>                                  | <a href="#">RT</a> |    |                                                                                       | 37    | 4.1E-7  | 2.5E-6    |
| <input type="checkbox"/> | UP_KEYWORDS      | <a href="#">Developmental protein</a>                            | <a href="#">RT</a> |    |                                                                                       | 37    | 4.7E-4  | 1.8E-3    |
| <input type="checkbox"/> | GOTERM_BP_DIRECT | <a href="#">cell differentiation</a>                             | <a href="#">RT</a> |    |                                                                                       | 29    | 6.1E-2  | 8.5E-1    |
| Annotation Cluster 23    |                  | Enrichment Score: 4.38                                           |                    | <b>G</b>                                                                            |    | Count | P_Value | Benjamini |
| <input type="checkbox"/> | GOTERM_BP_DIRECT | <a href="#">hydrogen ion transmembrane transport</a>             | <a href="#">RT</a> |    |                                                                                       | 14    | 2.7E-6  | 5.3E-4    |
| <input type="checkbox"/> | KEGG_PATHWAY     | <a href="#">Cardiac muscle contraction</a>                       | <a href="#">RT</a> |    |                                                                                       | 23    | 9.9E-6  | 1.3E-4    |
| <input type="checkbox"/> | GOTERM_MF_DIRECT | <a href="#">cytochrome-c oxidase activity</a>                    | <a href="#">RT</a> |    |                                                                                       | 9     | 2.6E-3  | 6.3E-2    |
| Annotation Cluster 24    |                  | Enrichment Score: 4.31                                           |                    | <b>G</b>                                                                            |  | Count | P_Value | Benjamini |
| <input type="checkbox"/> | UP_KEYWORDS      | <a href="#">Ubiquinone</a>                                       | <a href="#">RT</a> |  |                                                                                       | 12    | 1.2E-7  | 7.8E-7    |
| <input type="checkbox"/> | UP_KEYWORDS      | <a href="#">Iron-sulfur</a>                                      | <a href="#">RT</a> |  |                                                                                       | 15    | 4.1E-6  | 2.1E-5    |
| <input type="checkbox"/> | UP_KEYWORDS      | <a href="#">4Fe-4S</a>                                           | <a href="#">RT</a> |  |                                                                                       | 10    | 5.1E-5  | 2.3E-4    |
| <input type="checkbox"/> | GOTERM_MF_DIRECT | <a href="#">4 iron, 4 sulfur cluster binding</a>                 | <a href="#">RT</a> |  |                                                                                       | 10    | 1.3E-3  | 3.5E-2    |
| <input type="checkbox"/> | UP_SEQ_FEATURE   | metal ion-binding site:Iron-sulfur (4Fe-4S)                      | <a href="#">RT</a> |  |                                                                                       | 7     | 9.2E-3  | 6.1E-1    |
| Annotation Cluster 25    |                  | Enrichment Score: 4.2                                            |                    | <b>G</b>                                                                            |  | Count | P_Value | Benjamini |
| <input type="checkbox"/> | SMART            | <a href="#">14_3_3</a>                                           | <a href="#">RT</a> |  |                                                                                       | 7     | 6.7E-7  | 4.6E-5    |
| <input type="checkbox"/> | INTERPRO         | <a href="#">14-3-3 protein</a>                                   | <a href="#">RT</a> |  |                                                                                       | 7     | 1.8E-6  | 3.8E-4    |
| <input type="checkbox"/> | INTERPRO         | <a href="#">14-3-3 domain</a>                                    | <a href="#">RT</a> |  |                                                                                       | 7     | 1.8E-6  | 3.8E-4    |
| <input type="checkbox"/> | INTERPRO         | <a href="#">14-3-3 protein, conserved site</a>                   | <a href="#">RT</a> |  |                                                                                       | 7     | 1.8E-6  | 3.8E-4    |
| <input type="checkbox"/> | GOTERM_MF_DIRECT | <a href="#">protein domain specific binding</a>                  | <a href="#">RT</a> |  |                                                                                       | 15    | 4.0E-6  | 2.7E-4    |
| <input type="checkbox"/> | PIR_SUPERFAMILY  | <a href="#">14-3-3 protein</a>                                   | <a href="#">RT</a> |  |                                                                                       | 7     | 5.6E-5  | 1.0E-2    |
| <input type="checkbox"/> | UP_SEQ_FEATURE   | site:Interaction with phosphoserine on interacting protein       | <a href="#">RT</a> |  |                                                                                       | 7     | 1.8E-3  | 2.2E-1    |
| <input type="checkbox"/> | GOTERM_BP_DIRECT | <a href="#">protein targeting</a>                                | <a href="#">RT</a> |  |                                                                                       | 6     | 1.1E-2  | 4.1E-1    |
| <input type="checkbox"/> | KEGG_PATHWAY     | <a href="#">Cell cycle</a>                                       | <a href="#">RT</a> |  |                                                                                       | 9     | 9.5E-1  | 9.9E-1    |
| Annotation Cluster 26    |                  | Enrichment Score: 4.16                                           |                    | <b>G</b>                                                                            |  | Count | P_Value | Benjamini |
| <input type="checkbox"/> | UP_KEYWORDS      | <a href="#">Antibiotic</a>                                       | <a href="#">RT</a> |  |                                                                                       | 16    | 6.9E-7  | 4.0E-6    |
| <input type="checkbox"/> | UP_KEYWORDS      | <a href="#">Antimicrobial</a>                                    | <a href="#">RT</a> |  |                                                                                       | 17    | 2.5E-6  | 1.3E-5    |
| <input type="checkbox"/> | GOTERM_BP_DIRECT | <a href="#">defense response to bacterium</a>                    | <a href="#">RT</a> |  |                                                                                       | 11    | 2.0E-1  | 9.9E-1    |
| Annotation Cluster 27    |                  | Enrichment Score: 3.93                                           |                    | <b>G</b>                                                                            |  | Count | P_Value | Benjamini |
| <input type="checkbox"/> | INTERPRO         | <a href="#">Chaperonin TCP-1, conserved site</a>                 | <a href="#">RT</a> |  |                                                                                       | 8     | 6.9E-7  | 2.1E-4    |
| <input type="checkbox"/> | GOTERM_CC_DIRECT | <a href="#">chaperonin-containing T-complex</a>                  | <a href="#">RT</a> |  |                                                                                       | 8     | 1.2E-6  | 2.5E-5    |
| <input type="checkbox"/> | INTERPRO         | <a href="#">TCP-1-like chaperonin intermediate domain</a>        | <a href="#">RT</a> |  |                                                                                       | 8     | 2.1E-6  | 4.1E-4    |
| <input type="checkbox"/> | INTERPRO         | <a href="#">Chaperone tailless complex polypeptide 1 (TCP-1)</a> | <a href="#">RT</a> |  |                                                                                       | 8     | 2.1E-6  | 4.1E-4    |
| <input type="checkbox"/> | INTERPRO         | <a href="#">GroEL-like equatorial domain</a>                     | <a href="#">RT</a> |  |                                                                                       | 9     | 3.4E-6  | 5.6E-4    |
| <input type="checkbox"/> | INTERPRO         | <a href="#">GroEL-like apical domain</a>                         | <a href="#">RT</a> |  |                                                                                       | 9     | 3.4E-6  | 5.6E-4    |
| <input type="checkbox"/> | INTERPRO         | <a href="#">Chaperonin Cpn60/TCP-1</a>                           | <a href="#">RT</a> |  |                                                                                       | 9     | 6.8E-6  | 8.0E-4    |

| Annotation Cluster 1     |                  | Enrichment Score: 57.69                                                                  | G  |     | Count | P_Value | Benjamini |
|--------------------------|------------------|------------------------------------------------------------------------------------------|----|---------------------------------------------------------------------------------------|-------|---------|-----------|
| <input type="checkbox"/> | GOTERM_CC_DIRECT | <a href="#">zona pellucida receptor complex</a>                                          | RT |      | 7     | 1.0E-5  | 2.0E-4    |
| <input type="checkbox"/> | GOTERM_BP_DIRECT | <a href="#">binding of sperm to zona pellucida</a>                                       | RT |      | 12    | 1.1E-5  | 1.5E-3    |
| <input type="checkbox"/> | GOTERM_BP_DIRECT | <a href="#">positive regulation of protein localization to Cajal body</a>                | RT |      | 6     | 1.1E-4  | 1.0E-2    |
| <input type="checkbox"/> | GOTERM_BP_DIRECT | <a href="#">positive regulation of establishment of protein localization to telomere</a> | RT |      | 5     | 3.5E-3  | 1.9E-1    |
| <input type="checkbox"/> | GOTERM_BP_DIRECT | <a href="#">positive regulation of telomerase RNA localization to Cajal body</a>         | RT |      | 6     | 4.2E-3  | 2.2E-1    |
| <input type="checkbox"/> | GOTERM_BP_DIRECT | <a href="#">toxin transport</a>                                                          | RT |      | 8     | 7.0E-3  | 3.0E-1    |
| <input type="checkbox"/> | GOTERM_BP_DIRECT | <a href="#">scaRNA localization to Cajal body</a>                                        | RT |      | 3     | 4.4E-2  | 7.6E-1    |
| <input type="checkbox"/> | GOTERM_BP_DIRECT | <a href="#">positive regulation of telomere maintenance via telomerase</a>               | RT |      | 6     | 1.2E-1  | 9.4E-1    |
| <input type="checkbox"/> | GOTERM_BP_DIRECT | <a href="#">positive regulation of telomerase activity</a>                               | RT |      | 3     | 7.2E-1  | 1.0E0     |
| Annotation Cluster 28    |                  | Enrichment Score: 3.64                                                                   | G  |    | Count | P_Value | Benjamini |
| <input type="checkbox"/> | INTERPRO         | <a href="#">Heat shock protein 70, conserved site</a>                                    | RT |      | 9     | 3.4E-6  | 5.6E-4    |
| <input type="checkbox"/> | INTERPRO         | <a href="#">Heat shock protein 70 family</a>                                             | RT |      | 9     | 3.4E-6  | 5.6E-4    |
| <input type="checkbox"/> | KEGG_PATHWAY     | <a href="#">Spliceosome</a>                                                              | RT |      | 7     | 9.9E-1  | 1.0E0     |
| Annotation Cluster 29    |                  | Enrichment Score: 3.63                                                                   | G  |    | Count | P_Value | Benjamini |
| <input type="checkbox"/> | SMART            | <a href="#">PINT</a>                                                                     | RT |      | 10    | 4.6E-7  | 5.3E-5    |
| <input type="checkbox"/> | INTERPRO         | <a href="#">Proteasome component (PCI) domain</a>                                        | RT |      | 10    | 3.5E-6  | 5.3E-4    |
| <input type="checkbox"/> | GOTERM_CC_DIRECT | <a href="#">proteasome regulatory particle, lid subcomplex</a>                           | RT |      | 6     | 4.7E-4  | 6.7E-3    |
| <input type="checkbox"/> | UP_SEQ_FEATURE   | domain:PCI                                                                               | RT |      | 9     | 9.6E-4  | 1.4E-1    |
| <input type="checkbox"/> | INTERPRO         | <a href="#">Winged helix-turn-helix DNA-binding domain</a>                               | RT |      | 12    | 9.7E-1  | 1.0E0     |
| Annotation Cluster 30    |                  | Enrichment Score: 3.51                                                                   | G  |    | Count | P_Value | Benjamini |
| <input type="checkbox"/> | KEGG_PATHWAY     | <a href="#">Fatty acid metabolism</a>                                                    | RT |      | 17    | 1.1E-5  | 1.4E-4    |
| <input type="checkbox"/> | KEGG_PATHWAY     | <a href="#">Valine, leucine and isoleucine degradation</a>                               | RT |      | 16    | 8.6E-5  | 9.0E-4    |
| <input type="checkbox"/> | KEGG_PATHWAY     | <a href="#">Fatty acid degradation</a>                                                   | RT |      | 14    | 1.4E-4  | 1.3E-3    |
| <input type="checkbox"/> | GOTERM_BP_DIRECT | <a href="#">fatty acid beta-oxidation</a>                                                | RT |      | 7     | 6.5E-2  | 8.6E-1    |
| Annotation Cluster 31    |                  | Enrichment Score: 3.47                                                                   | G  |  | Count | P_Value | Benjamini |
| <input type="checkbox"/> | INTERPRO         | <a href="#">Thioredoxin-like fold</a>                                                    | RT |    | 30    | 9.2E-8  | 4.9E-5    |
| <input type="checkbox"/> | GOTERM_BP_DIRECT | <a href="#">cellular oxidant detoxification</a>                                          | RT |    | 15    | 1.5E-7  | 3.8E-5    |
| <input type="checkbox"/> | UP_KEYWORDS      | <a href="#">Antioxidant</a>                                                              | RT |    | 10    | 1.6E-7  | 1.0E-6    |
| <input type="checkbox"/> | UP_KEYWORDS      | <a href="#">Redox-active center</a>                                                      | RT |    | 13    | 5.2E-7  | 3.1E-6    |
| <input type="checkbox"/> | INTERPRO         | <a href="#">Thioredoxin domain</a>                                                       | RT |    | 12    | 1.4E-4  | 1.2E-2    |
| <input type="checkbox"/> | GOTERM_BP_DIRECT | <a href="#">cell redox homeostasis</a>                                                   | RT |    | 16    | 1.5E-4  | 1.3E-2    |
| <input type="checkbox"/> | UP_KEYWORDS      | <a href="#">Peroxidase</a>                                                               | RT |    | 8     | 2.8E-4  | 1.1E-3    |
| <input type="checkbox"/> | INTERPRO         | <a href="#">Peroxiredoxin, C-terminal</a>                                                | RT |    | 4     | 4.6E-3  | 1.9E-1    |
| <input type="checkbox"/> | INTERPRO         | <a href="#">Alkyl hydroperoxide reductase subunit C/Thiol specific antioxidant</a>       | RT |    | 4     | 4.6E-3  | 1.9E-1    |
| <input type="checkbox"/> | GOTERM_MF_DIRECT | <a href="#">peroxiredoxin activity</a>                                                   | RT |    | 4     | 6.4E-3  | 1.2E-1    |
| <input type="checkbox"/> | INTERPRO         | <a href="#">Peroxiredoxin, AhpC-type</a>                                                 | RT |    | 3     | 1.9E-2  | 4.2E-1    |
| <input type="checkbox"/> | UP_SEQ_FEATURE   | active site:Cysteine sulfenic acid (-SOH) intermediate                                   | RT |    | 5     | 4.3E-2  | 9.6E-1    |
| <input type="checkbox"/> | GOTERM_MF_DIRECT | <a href="#">thioredoxin peroxidase activity</a>                                          | RT |    | 3     | 4.3E-2  | 4.5E-1    |
| <input type="checkbox"/> | UP_SEQ_FEATURE   | domain:Thioredoxin                                                                       | RT |    | 8     | 5.3E-2  | 9.8E-1    |
| <input type="checkbox"/> | PIR_SUPERFAMILY  | <a href="#">peroxiredoxin, AhpC type</a>                                                 | RT |    | 3     | 5.8E-2  | 9.7E-1    |
| Annotation Cluster 32    |                  | Enrichment Score: 3.1                                                                    | G  |  | Count | P_Value | Benjamini |
| <input type="checkbox"/> | UP_KEYWORDS      | <a href="#">Milk protein</a>                                                             | RT |    | 7     | 1.6E-6  | 8.7E-6    |
| <input type="checkbox"/> | GOTERM_BP_DIRECT | <a href="#">response to dehydroepiandrosterone</a>                                       | RT |    | 5     | 3.1E-4  | 2.5E-2    |
| <input type="checkbox"/> | GOTERM_BP_DIRECT | <a href="#">response to 11-deoxycorticosterone</a>                                       | RT |    | 5     | 3.1E-4  | 2.5E-2    |
| <input type="checkbox"/> | GOTERM_BP_DIRECT | <a href="#">response to progesterone</a>                                                 | RT |    | 6     | 1.8E-3  | 1.2E-1    |
| <input type="checkbox"/> | GOTERM_CC_DIRECT | <a href="#">Golgi lumen</a>                                                              | RT |    | 5     | 3.0E-3  | 3.3E-2    |
| <input type="checkbox"/> | GOTERM_BP_DIRECT | <a href="#">response to estradiol</a>                                                    | RT |    | 5     | 1.3E-2  | 4.4E-1    |
| <input type="checkbox"/> | INTERPRO         | <a href="#">Casein, alpha/beta</a>                                                       | RT |    | 3     | 1.9E-2  | 4.2E-1    |
| Annotation Cluster 33    |                  | Enrichment Score: 3.05                                                                   | G  |  | Count | P_Value | Benjamini |
| <input type="checkbox"/> | GOTERM_BP_DIRECT | <a href="#">proteolysis involved in cellular protein catabolic process</a>               | RT |    | 16    | 1.2E-7  | 3.5E-5    |
| <input type="checkbox"/> | UP_KEYWORDS      | <a href="#">Thiol protease</a>                                                           | RT |    | 18    | 9.9E-6  | 4.9E-5    |

| Annotation Cluster 1     |                  | Enrichment Score: 57.69                                                                   | <b>G</b>           |     | Count | P_Value | Benjamini |
|--------------------------|------------------|-------------------------------------------------------------------------------------------|--------------------|---------------------------------------------------------------------------------------|-------|---------|-----------|
| <input type="checkbox"/> | INTERPRO         | <a href="#">Cysteine peptidase, asparagine active site</a>                                | <a href="#">RT</a> |      | 7     | 8.9E-5  | 8.1E-3    |
| <input type="checkbox"/> | SMART            | <a href="#">Pept_C1</a>                                                                   | <a href="#">RT</a> |      | 7     | 1.1E-4  | 3.6E-3    |
| <input type="checkbox"/> | INTERPRO         | <a href="#">Peptidase C1A, papain C-terminal</a>                                          | <a href="#">RT</a> |      | 7     | 2.9E-4  | 2.1E-2    |
| <input type="checkbox"/> | INTERPRO         | <a href="#">Peptidase C1A, papain</a>                                                     | <a href="#">RT</a> |      | 7     | 2.9E-4  | 2.1E-2    |
| <input type="checkbox"/> | INTERPRO         | <a href="#">Cysteine peptidase, histidine active site</a>                                 | <a href="#">RT</a> |      | 6     | 1.0E-3  | 5.6E-2    |
| <input type="checkbox"/> | INTERPRO         | <a href="#">Cysteine peptidase, cysteine active site</a>                                  | <a href="#">RT</a> |      | 7     | 5.2E-3  | 1.9E-1    |
| <input type="checkbox"/> | GOTERM_MF_DIRECT | <a href="#">cysteine-type endopeptidase activity</a>                                      | <a href="#">RT</a> |      | 10    | 5.8E-3  | 1.1E-1    |
| <input type="checkbox"/> | GOTERM_MF_DIRECT | <a href="#">cysteine-type peptidase activity</a>                                          | <a href="#">RT</a> |      | 6     | 6.0E-3  | 1.1E-1    |
| <input type="checkbox"/> | SMART            | <a href="#">SM00848</a>                                                                   | <a href="#">RT</a> |      | 4     | 9.1E-3  | 1.5E-1    |
| <input type="checkbox"/> | INTERPRO         | <a href="#">Proteinase inhibitor I29, cathepsin propeptide</a>                            | <a href="#">RT</a> |      | 4     | 1.4E-2  | 3.7E-1    |
| <input type="checkbox"/> | GOTERM_BP_DIRECT | <a href="#">cellular response to thyroid hormone stimulus</a>                             | <a href="#">RT</a> |      | 4     | 5.5E-2  | 8.3E-1    |
| <input type="checkbox"/> | UP_SEQ_FEATURE   | propeptide:Activation peptide                                                             | <a href="#">RT</a> |      | 11    | 1.5E-1  | 1.0E0     |
| Annotation Cluster 34    |                  | Enrichment Score: 2.61                                                                    | <b>G</b>           |    | Count | P_Value | Benjamini |
| <input type="checkbox"/> | GOTERM_MF_DIRECT | <a href="#">G-protein beta/gamma-subunit complex binding</a>                              | <a href="#">RT</a> |      | 9     | 1.6E-5  | 9.0E-4    |
| <input type="checkbox"/> | SMART            | <a href="#">SM00275</a>                                                                   | <a href="#">RT</a> |      | 8     | 4.5E-5  | 1.7E-3    |
| <input type="checkbox"/> | GOTERM_MF_DIRECT | <a href="#">G-protein coupled receptor binding</a>                                        | <a href="#">RT</a> |      | 12    | 4.9E-5  | 2.5E-3    |
| <input type="checkbox"/> | INTERPRO         | <a href="#">G protein alpha subunit, helical insertion</a>                                | <a href="#">RT</a> |      | 8     | 1.3E-4  | 1.2E-2    |
| <input type="checkbox"/> | INTERPRO         | <a href="#">Guanine nucleotide binding protein (G-protein), alpha subunit</a>             | <a href="#">RT</a> |      | 8     | 1.3E-4  | 1.2E-2    |
| <input type="checkbox"/> | INTERPRO         | <a href="#">G-protein alpha subunit, group I</a>                                          | <a href="#">RT</a> |      | 5     | 2.3E-3  | 1.1E-1    |
| <input type="checkbox"/> | GOTERM_CC_DIRECT | <a href="#">heterotrimeric G-protein complex</a>                                          | <a href="#">RT</a> |      | 8     | 1.3E-2  | 1.1E-1    |
| <input type="checkbox"/> | GOTERM_MF_DIRECT | <a href="#">signal transducer activity</a>                                                | <a href="#">RT</a> |      | 20    | 2.9E-2  | 3.6E-1    |
| <input type="checkbox"/> | GOTERM_BP_DIRECT | <a href="#">adenylate cyclase-modulating G-protein coupled receptor signaling pathway</a> | <a href="#">RT</a> |      | 5     | 8.7E-2  | 9.1E-1    |
| <input type="checkbox"/> | KEGG_PATHWAY     | <a href="#">Long-term depression</a>                                                      | <a href="#">RT</a> |      | 8     | 4.0E-1  | 7.3E-1    |
| <input type="checkbox"/> | UP_KEYWORDS      | <a href="#">Transducer</a>                                                                | <a href="#">RT</a> |      | 18    | 1.0E0   | 1.0E0     |
| Annotation Cluster 35    |                  | Enrichment Score: 2.58                                                                    | <b>G</b>           |  | Count | P_Value | Benjamini |
| <input type="checkbox"/> | KEGG_PATHWAY     | <a href="#">2-Oxocarboxylic acid metabolism</a>                                           | <a href="#">RT</a> |    | 10    | 2.4E-5  | 2.8E-4    |
| <input type="checkbox"/> | SMART            | <a href="#">SM01329</a>                                                                   | <a href="#">RT</a> |    | 5     | 1.0E-4  | 3.5E-3    |
| <input type="checkbox"/> | INTERPRO         | <a href="#">Isopropylmalate dehydrogenase-like domain</a>                                 | <a href="#">RT</a> |    | 5     | 2.0E-4  | 1.5E-2    |
| <input type="checkbox"/> | INTERPRO         | <a href="#">Isocitrate/isopropylmalate dehydrogenase, conserved site</a>                  | <a href="#">RT</a> |    | 5     | 2.0E-4  | 1.5E-2    |
| <input type="checkbox"/> | UP_SEQ_FEATURE   | site:Critical for catalysis                                                               | <a href="#">RT</a> |    | 5     | 8.8E-3  | 6.2E-1    |
| <input type="checkbox"/> | INTERPRO         | <a href="#">Isocitrate dehydrogenase NAD-dependent</a>                                    | <a href="#">RT</a> |    | 3     | 1.9E-2  | 4.2E-1    |
| <input type="checkbox"/> | INTERPRO         | <a href="#">Isocitrate and isopropylmalate dehydrogenases family</a>                      | <a href="#">RT</a> |    | 3     | 1.9E-2  | 4.2E-1    |
| <input type="checkbox"/> | GOTERM_MF_DIRECT | <a href="#">isocitrate dehydrogenase (NAD+) activity</a>                                  | <a href="#">RT</a> |    | 3     | 2.3E-2  | 3.3E-1    |
| <input type="checkbox"/> | GOTERM_BP_DIRECT | <a href="#">isocitrate metabolic process</a>                                              | <a href="#">RT</a> |    | 3     | 2.3E-2  | 5.9E-1    |
| <input type="checkbox"/> | UP_SEQ_FEATURE   | metal ion-binding site:Magnesium or manganese                                             | <a href="#">RT</a> |    | 5     | 1.1E-1  | 1.0E0     |
| Annotation Cluster 36    |                  | Enrichment Score: 2.46                                                                    | <b>G</b>           |  | Count | P_Value | Benjamini |
| <input type="checkbox"/> | UP_KEYWORDS      | <a href="#">Cell junction</a>                                                             | <a href="#">RT</a> |    | 40    | 5.9E-5  | 2.6E-4    |
| <input type="checkbox"/> | UP_KEYWORDS      | <a href="#">Synapse</a>                                                                   | <a href="#">RT</a> |    | 19    | 2.4E-2  | 6.3E-2    |
| <input type="checkbox"/> | GOTERM_CC_DIRECT | <a href="#">cell junction</a>                                                             | <a href="#">RT</a> |    | 28    | 3.0E-2  | 2.1E-1    |
| Annotation Cluster 37    |                  | Enrichment Score: 2.45                                                                    | <b>G</b>           |  | Count | P_Value | Benjamini |
| <input type="checkbox"/> | SMART            | <a href="#">RNase Pc</a>                                                                  | <a href="#">RT</a> |    | 9     | 6.5E-6  | 2.8E-4    |
| <input type="checkbox"/> | INTERPRO         | <a href="#">Ribonuclease A, active site</a>                                               | <a href="#">RT</a> |    | 8     | 1.2E-5  | 1.3E-3    |
| <input type="checkbox"/> | INTERPRO         | <a href="#">Ribonuclease A</a>                                                            | <a href="#">RT</a> |    | 9     | 2.2E-5  | 2.2E-3    |
| <input type="checkbox"/> | INTERPRO         | <a href="#">Ribonuclease A-domain</a>                                                     | <a href="#">RT</a> |    | 9     | 2.2E-5  | 2.2E-3    |
| <input type="checkbox"/> | GOTERM_MF_DIRECT | <a href="#">endonuclease activity</a>                                                     | <a href="#">RT</a> |    | 10    | 2.1E-4  | 7.9E-3    |
| <input type="checkbox"/> | UP_KEYWORDS      | <a href="#">Endonuclease</a>                                                              | <a href="#">RT</a> |    | 13    | 3.3E-4  | 1.3E-3    |
| <input type="checkbox"/> | UP_KEYWORDS      | <a href="#">Nuclease</a>                                                                  | <a href="#">RT</a> |    | 15    | 1.5E-3  | 5.3E-3    |
| <input type="checkbox"/> | GOTERM_BP_DIRECT | <a href="#">RNA phosphodiester bond hydrolysis</a>                                        | <a href="#">RT</a> |    | 4     | 6.5E-3  | 2.9E-1    |
| <input type="checkbox"/> | GOTERM_MF_DIRECT | <a href="#">ribonuclease A activity</a>                                                   | <a href="#">RT</a> |    | 3     | 2.3E-2  | 3.3E-1    |
| <input type="checkbox"/> | GOTERM_MF_DIRECT | <a href="#">ribonuclease activity</a>                                                     | <a href="#">RT</a> |    | 5     | 6.1E-2  | 5.5E-1    |
| <input type="checkbox"/> | UP_SEQ_FEATURE   | chain:Angiogenin-1                                                                        | <a href="#">RT</a> |    | 3     | 2.0E-1  | 1.0E0     |

|                          | Annotation Cluster    | Enrichment Score                                                                        |    |  | Count | P_Value | Benjamini |
|--------------------------|-----------------------|-----------------------------------------------------------------------------------------|----|--|-------|---------|-----------|
| <input type="checkbox"/> | UP_SEQ_FEATURE        | chain:Angiogenin-2                                                                      | RT |  | 3     | 2.0E-1  | 1.0E0     |
| <input type="checkbox"/> | UP_SEQ_FEATURE        | chain:Ribonuclease 4                                                                    | RT |  | 3     | 2.0E-1  | 1.0E0     |
| <input type="checkbox"/> | GOTERM_BP_DIRECT      | <a href="#">RNA phosphodiester bond hydrolysis, endonucleolytic</a>                     | RT |  | 4     | 4.7E-1  | 1.0E0     |
| <input type="checkbox"/> | GOTERM_MF_DIRECT      | <a href="#">nucleic acid binding</a>                                                    | RT |  | 13    | 1.0E0   | 1.0E0     |
|                          | Annotation Cluster 38 | Enrichment Score: 2.42                                                                  | G  |  | Count | P_Value | Benjamini |
| <input type="checkbox"/> | KEGG_PATHWAY          | <a href="#">Pyruvate metabolism</a>                                                     | RT |  | 15    | 1.1E-5  | 1.4E-4    |
| <input type="checkbox"/> | KEGG_PATHWAY          | <a href="#">Cysteine and methionine metabolism</a>                                      | RT |  | 14    | 5.6E-5  | 6.1E-4    |
| <input type="checkbox"/> | INTERPRO              | <a href="#">Lactate dehydrogenase/glycoside hydrolase, family 4, C-terminal</a>         | RT |  | 6     | 1.6E-4  | 1.3E-2    |
| <input type="checkbox"/> | INTERPRO              | <a href="#">Lactate/malate dehydrogenase, N-terminal</a>                                | RT |  | 5     | 1.2E-3  | 6.4E-2    |
| <input type="checkbox"/> | INTERPRO              | <a href="#">Lactate/malate dehydrogenase, C-terminal</a>                                | RT |  | 5     | 1.2E-3  | 6.4E-2    |
| <input type="checkbox"/> | INTERPRO              | <a href="#">L-lactate/malate dehydrogenase</a>                                          | RT |  | 5     | 1.2E-3  | 6.4E-2    |
| <input type="checkbox"/> | PIR_SUPERFAMILY       | <a href="#">L-lactate/malate dehydrogenase</a>                                          | RT |  | 5     | 5.2E-3  | 3.8E-1    |
| <input type="checkbox"/> | INTERPRO              | <a href="#">L-lactate dehydrogenase, active site</a>                                    | RT |  | 3     | 3.5E-2  | 5.9E-1    |
| <input type="checkbox"/> | INTERPRO              | <a href="#">L-lactate dehydrogenase</a>                                                 | RT |  | 3     | 3.5E-2  | 5.9E-1    |
| <input type="checkbox"/> | UP_SEQ_FEATURE        | binding site:NAD                                                                        | RT |  | 11    | 3.7E-2  | 9.5E-1    |
| <input type="checkbox"/> | GOTERM_MF_DIRECT      | <a href="#">L-lactate dehydrogenase activity</a>                                        | RT |  | 3     | 4.3E-2  | 4.5E-1    |
| <input type="checkbox"/> | GOTERM_BP_DIRECT      | <a href="#">carboxylic acid metabolic process</a>                                       | RT |  | 4     | 7.1E-2  | 8.7E-1    |
| <input type="checkbox"/> | UP_SEQ_FEATURE        | binding site:NAD or substrate                                                           | RT |  | 3     | 2.9E-1  | 1.0E0     |
|                          | Annotation Cluster 39 | Enrichment Score: 2.33                                                                  | G  |  | Count | P_Value | Benjamini |
| <input type="checkbox"/> | INTERPRO              | <a href="#">GroES-like</a>                                                              | RT |  | 8     | 6.7E-4  | 4.1E-2    |
| <input type="checkbox"/> | INTERPRO              | <a href="#">Alcohol dehydrogenase, C-terminal</a>                                       | RT |  | 7     | 7.3E-4  | 4.3E-2    |
| <input type="checkbox"/> | SMART                 | <a href="#">SM00829</a>                                                                 | RT |  | 6     | 2.5E-3  | 6.0E-2    |
| <input type="checkbox"/> | INTERPRO              | <a href="#">Polyketide synthase, enoylreductase</a>                                     | RT |  | 6     | 5.2E-3  | 2.0E-1    |
| <input type="checkbox"/> | INTERPRO              | <a href="#">Alcohol dehydrogenase superfamily, zinc-type</a>                            | RT |  | 6     | 1.2E-2  | 3.4E-1    |
| <input type="checkbox"/> | INTERPRO              | <a href="#">Alcohol dehydrogenase GroES-like</a>                                        | RT |  | 4     | 1.3E-1  | 9.4E-1    |
|                          | Annotation Cluster 40 | Enrichment Score: 2.31                                                                  | G  |  | Count | P_Value | Benjamini |
| <input type="checkbox"/> | UP_KEYWORDS           | <a href="#">Cilium biogenesis/degradation</a>                                           | RT |  | 14    | 1.3E-5  | 6.1E-5    |
| <input type="checkbox"/> | GOTERM_BP_DIRECT      | <a href="#">cilium morphogenesis</a>                                                    | RT |  | 12    | 9.5E-3  | 3.7E-1    |
| <input type="checkbox"/> | GOTERM_BP_DIRECT      | <a href="#">cilium assembly</a>                                                         | RT |  | 6     | 9.4E-1  | 1.0E0     |
|                          | Annotation Cluster 41 | Enrichment Score: 2.27                                                                  | G  |  | Count | P_Value | Benjamini |
| <input type="checkbox"/> | INTERPRO              | <a href="#">ATP-citrate lyase/succinyl-CoA ligase</a>                                   | RT |  | 4     | 2.0E-3  | 9.5E-2    |
| <input type="checkbox"/> | INTERPRO              | <a href="#">Succinyl-CoA synthetase-like</a>                                            | RT |  | 4     | 2.0E-3  | 9.5E-2    |
| <input type="checkbox"/> | INTERPRO              | <a href="#">ATP-grasp fold, subdomain 2</a>                                             | RT |  | 6     | 1.2E-2  | 3.4E-1    |
| <input type="checkbox"/> | INTERPRO              | <a href="#">Succinyl-CoA synthetase, beta subunit, conserved site</a>                   | RT |  | 3     | 1.9E-2  | 4.2E-1    |
|                          | Annotation Cluster 42 | Enrichment Score: 2.18                                                                  | G  |  | Count | P_Value | Benjamini |
| <input type="checkbox"/> | INTERPRO              | <a href="#">ATPase, alpha/beta subunit, nucleotide-binding domain, active site</a>      | RT |  | 4     | 4.6E-3  | 1.9E-1    |
| <input type="checkbox"/> | INTERPRO              | <a href="#">ATPase, alpha/beta subunit, N-terminal</a>                                  | RT |  | 4     | 4.6E-3  | 1.9E-1    |
| <input type="checkbox"/> | INTERPRO              | <a href="#">ATPase, F1/V1/A1 complex, alpha/beta subunit, nucleotide-binding domain</a> | RT |  | 4     | 4.6E-3  | 1.9E-1    |
| <input type="checkbox"/> | INTERPRO              | <a href="#">ATPase, F1/V1/A1 complex, alpha/beta subunit, C-terminal</a>                | RT |  | 3     | 1.9E-2  | 4.2E-1    |
|                          | Annotation Cluster 43 | Enrichment Score: 2.17                                                                  | G  |  | Count | P_Value | Benjamini |
| <input type="checkbox"/> | UP_KEYWORDS           | <a href="#">Complement alternate pathway</a>                                            | RT |  | 5     | 1.1E-3  | 3.9E-3    |
| <input type="checkbox"/> | GOTERM_BP_DIRECT      | <a href="#">complement activation, alternative pathway</a>                              | RT |  | 5     | 1.9E-3  | 1.2E-1    |
| <input type="checkbox"/> | KEGG_PATHWAY          | <a href="#">Staphylococcus aureus infection</a>                                         | RT |  | 10    | 1.4E-1  | 4.3E-1    |
|                          | Annotation Cluster 44 | Enrichment Score: 2.17                                                                  | G  |  | Count | P_Value | Benjamini |
| <input type="checkbox"/> | GOTERM_MF_DIRECT      | <a href="#">cytochrome-c oxidase activity</a>                                           | RT |  | 9     | 2.6E-3  | 6.3E-2    |
| <input type="checkbox"/> | GOTERM_BP_DIRECT      | <a href="#">mitochondrial electron transport, cytochrome c to oxygen</a>                | RT |  | 6     | 2.8E-3  | 1.6E-1    |
| <input type="checkbox"/> | GOTERM_CC_DIRECT      | <a href="#">respiratory chain complex IV</a>                                            | RT |  | 6     | 9.7E-3  | 9.0E-2    |
| <input type="checkbox"/> | GOTERM_CC_DIRECT      | <a href="#">mitochondrial respiratory chain complex IV</a>                              | RT |  | 5     | 2.8E-2  | 2.1E-1    |
|                          | Annotation Cluster 45 | Enrichment Score: 2.14                                                                  | G  |  | Count | P_Value | Benjamini |
| <input type="checkbox"/> | GOTERM_BP_DIRECT      | <a href="#">defense response to Gram-negative bacterium</a>                             | RT |  | 13    | 1.1E-4  | 1.0E-2    |
| <input type="checkbox"/> | SMART                 | <a href="#">LYZ1</a>                                                                    | RT |  | 6     | 3.4E-3  | 7.6E-2    |
| <input type="checkbox"/> | INTERPRO              | <a href="#">Glycoside hydrolase, family 22</a>                                          | RT |  | 6     | 7.0E-3  | 2.3E-1    |

|                          | Annotation Cluster    | Enrichment Score                                                                        |    |  | Count | P_Value | Benjamini |
|--------------------------|-----------------------|-----------------------------------------------------------------------------------------|----|--|-------|---------|-----------|
| <input type="checkbox"/> | INTERPRO              | Lysozyme-like domain                                                                    | RT |  | 6     | 9.3E-3  | 2.8E-1    |
| <input type="checkbox"/> | GOTERM_BP_DIRECT      | cell wall macromolecule catabolic process                                               | RT |  | 6     | 1.1E-2  | 4.1E-1    |
| <input type="checkbox"/> | GOTERM_MF_DIRECT      | lysozyme activity                                                                       | RT |  | 6     | 1.5E-2  | 2.4E-1    |
| <input type="checkbox"/> | INTERPRO              | Glycoside hydrolase, family 22, conserved site                                          | RT |  | 5     | 2.2E-2  | 4.6E-1    |
| <input type="checkbox"/> | GOTERM_BP_DIRECT      | defense response to Gram-positive bacterium                                             | RT |  | 12    | 2.3E-2  | 5.8E-1    |
| <input type="checkbox"/> | INTERPRO              | Glycoside hydrolase, family 22, lysozyme                                                | RT |  | 5     | 2.8E-2  | 5.3E-1    |
|                          | Annotation Cluster 46 | Enrichment Score: 2.11                                                                  | G  |  | Count | P_Value | Benjamini |
| <input type="checkbox"/> | INTERPRO              | Lactate dehydrogenase/glycoside hydrolase, family 4, C-terminal                         | RT |  | 6     | 1.6E-4  | 1.3E-2    |
| <input type="checkbox"/> | GOTERM_MF_DIRECT      | L-malate dehydrogenase activity                                                         | RT |  | 3     | 2.3E-2  | 3.3E-1    |
| <input type="checkbox"/> | GOTERM_BP_DIRECT      | malate metabolic process                                                                | RT |  | 3     | 1.3E-1  | 9.6E-1    |
|                          | Annotation Cluster 47 | Enrichment Score: 2.1                                                                   | G  |  | Count | P_Value | Benjamini |
| <input type="checkbox"/> | INTERPRO              | Mitochondrial carrier protein                                                           | RT |  | 9     | 5.5E-4  | 3.6E-2    |
| <input type="checkbox"/> | INTERPRO              | Mitochondrial substrate/solute carrier                                                  | RT |  | 13    | 6.0E-4  | 3.8E-2    |
| <input type="checkbox"/> | INTERPRO              | Mitochondrial carrier domain                                                            | RT |  | 13    | 6.0E-4  | 3.8E-2    |
| <input type="checkbox"/> | UP_SEQ_FEATURE        | repeat:Solcar 1                                                                         | RT |  | 13    | 4.3E-3  | 4.2E-1    |
| <input type="checkbox"/> | UP_SEQ_FEATURE        | repeat:Solcar 2                                                                         | RT |  | 13    | 4.3E-3  | 4.2E-1    |
| <input type="checkbox"/> | UP_SEQ_FEATURE        | repeat:Solcar 3                                                                         | RT |  | 10    | 4.2E-2  | 9.7E-1    |
| <input type="checkbox"/> | GOTERM_MF_DIRECT      | structural constituent of ribosome                                                      | RT |  | 28    | 4.4E-2  | 4.5E-1    |
| <input type="checkbox"/> | GOTERM_BP_DIRECT      | translation                                                                             | RT |  | 22    | 9.9E-2  | 9.3E-1    |
| <input type="checkbox"/> | GOTERM_BP_DIRECT      | transmembrane transport                                                                 | RT |  | 14    | 2.0E-1  | 9.9E-1    |
|                          | Annotation Cluster 48 | Enrichment Score: 1.95                                                                  | G  |  | Count | P_Value | Benjamini |
| <input type="checkbox"/> | INTERPRO              | Mitochondrial carrier protein                                                           | RT |  | 9     | 5.5E-4  | 3.6E-2    |
| <input type="checkbox"/> | INTERPRO              | Adenine nucleotide translocator 1                                                       | RT |  | 4     | 2.0E-3  | 9.5E-2    |
| <input type="checkbox"/> | UP_SEQ_FEATURE        | short sequence motif:Substrate recognition                                              | RT |  | 4     | 3.3E-2  | 9.4E-1    |
| <input type="checkbox"/> | UP_SEQ_FEATURE        | repeat:Solcar 3                                                                         | RT |  | 10    | 4.2E-2  | 9.7E-1    |
| <input type="checkbox"/> | UP_SEQ_FEATURE        | binding site:Nucleotide                                                                 | RT |  | 3     | 1.2E-1  | 1.0E0     |
|                          | Annotation Cluster 49 | Enrichment Score: 1.93                                                                  | G  |  | Count | P_Value | Benjamini |
| <input type="checkbox"/> | GOTERM_CC_DIRECT      | proteasome regulatory particle, base subcomplex                                         | RT |  | 8     | 2.0E-5  | 3.7E-4    |
| <input type="checkbox"/> | GOTERM_CC_DIRECT      | nuclear proteasome complex                                                              | RT |  | 5     | 3.0E-3  | 3.3E-2    |
| <input type="checkbox"/> | INTERPRO              | ATPase, AAA-type, conserved site                                                        | RT |  | 8     | 4.6E-3  | 1.9E-1    |
| <input type="checkbox"/> | INTERPRO              | ATPase, AAA-type, core                                                                  | RT |  | 10    | 7.6E-3  | 2.5E-1    |
| <input type="checkbox"/> | INTERPRO              | 26S proteasome subunit P45                                                              | RT |  | 4     | 8.7E-3  | 2.7E-1    |
| <input type="checkbox"/> | GOTERM_BP_DIRECT      | positive regulation of proteasomal protein catabolic process                            | RT |  | 5     | 9.1E-3  | 3.6E-1    |
| <input type="checkbox"/> | GOTERM_MF_DIRECT      | proteasome-activating ATPase activity                                                   | RT |  | 4     | 1.2E-2  | 2.0E-1    |
| <input type="checkbox"/> | GOTERM_CC_DIRECT      | cytosolic proteasome complex                                                            | RT |  | 4     | 1.8E-2  | 1.4E-1    |
| <input type="checkbox"/> | GOTERM_BP_DIRECT      | positive regulation of RNA polymerase II transcriptional preinitiation complex assembly | RT |  | 4     | 2.0E-2  | 5.4E-1    |
| <input type="checkbox"/> | GOTERM_MF_DIRECT      | TBP-class protein binding                                                               | RT |  | 4     | 5.5E-2  | 5.2E-1    |
| <input type="checkbox"/> | GOTERM_BP_DIRECT      | ER-associated ubiquitin-dependent protein catabolic process                             | RT |  | 9     | 6.5E-2  | 8.6E-1    |
| <input type="checkbox"/> | SMART                 | AAA                                                                                     | RT |  | 14    | 1.2E-1  | 7.2E-1    |
| <input type="checkbox"/> | INTERPRO              | AAA+ ATPase domain                                                                      | RT |  | 14    | 2.7E-1  | 9.9E-1    |
|                          | Annotation Cluster 50 | Enrichment Score: 1.9                                                                   | G  |  | Count | P_Value | Benjamini |
| <input type="checkbox"/> | INTERPRO              | Kringle-like fold                                                                       | RT |  | 9     | 7.4E-4  | 4.3E-2    |
| <input type="checkbox"/> | SMART                 | FN2                                                                                     | RT |  | 6     | 1.8E-3  | 4.6E-2    |
| <input type="checkbox"/> | INTERPRO              | Fibronectin, type II, collagen-binding                                                  | RT |  | 6     | 3.7E-3  | 1.6E-1    |
| <input type="checkbox"/> | GOTERM_BP_DIRECT      | sperm capacitation                                                                      | RT |  | 5     | 6.2E-2  | 8.5E-1    |
| <input type="checkbox"/> | UP_SEQ_FEATURE        | domain:Fibronectin type-II 2                                                            | RT |  | 4     | 1.2E-1  | 1.0E0     |
| <input type="checkbox"/> | UP_SEQ_FEATURE        | domain:Fibronectin type-II 1                                                            | RT |  | 4     | 1.2E-1  | 1.0E0     |
|                          | Annotation Cluster 51 | Enrichment Score: 1.87                                                                  | G  |  | Count | P_Value | Benjamini |
| <input type="checkbox"/> | UP_SEQ_FEATURE        | metal ion-binding site:Manganese                                                        | RT |  | 12    | 8.3E-6  | 2.9E-3    |
| <input type="checkbox"/> | GOTERM_BP_DIRECT      | protein dephosphorylation                                                               | RT |  | 13    | 1.7E-5  | 2.3E-3    |
| <input type="checkbox"/> | GOTERM_MF_DIRECT      | phosphoprotein phosphatase activity                                                     | RT |  | 10    | 1.0E-4  | 4.3E-3    |



| Annotation Cluster 1     |                  | Enrichment Score: 57.69                                                                         | G  |     | Count | P_Value | Benjamini |
|--------------------------|------------------|-------------------------------------------------------------------------------------------------|----|---------------------------------------------------------------------------------------|-------|---------|-----------|
| <input type="checkbox"/> | INTERPRO         | <a href="#">Metallophosphoesterase domain</a>                                                   | RT |      | 10    | 1.8E-4  | 1.4E-2    |
| <input type="checkbox"/> | GOTERM_MF_DIRECT | <a href="#">phosphatase activity</a>                                                            | RT |      | 8     | 6.4E-4  | 1.9E-2    |
| <input type="checkbox"/> | SMART            | <a href="#">PP2Ac</a>                                                                           | RT |      | 6     | 1.2E-3  | 3.4E-2    |
| <input type="checkbox"/> | INTERPRO         | <a href="#">Serine/threonine-specific protein phosphatase/bis(5-nucleosyl)-tetraphosphatase</a> | RT |      | 6     | 2.5E-3  | 1.1E-1    |
| <input type="checkbox"/> | GOTERM_MF_DIRECT | <a href="#">protein serine/threonine phosphatase activity</a>                                   | RT |      | 10    | 5.8E-3  | 1.1E-1    |
| <input type="checkbox"/> | UP_KEYWORDS      | <a href="#">Protein phosphatase</a>                                                             | RT |      | 14    | 8.6E-3  | 2.6E-2    |
| <input type="checkbox"/> | UP_KEYWORDS      | <a href="#">Glycogen metabolism</a>                                                             | RT |      | 5     | 1.1E-2  | 3.3E-2    |
| <input type="checkbox"/> | GOTERM_CC_DIRECT | <a href="#">MLL5-L complex</a>                                                                  | RT |      | 4     | 2.7E-2  | 2.0E-1    |
| <input type="checkbox"/> | UP_KEYWORDS      | <a href="#">Biological rhythms</a>                                                              | RT |      | 7     | 5.4E-2  | 1.3E-1    |
| <input type="checkbox"/> | GOTERM_BP_DIRECT | <a href="#">glycogen metabolic process</a>                                                      | RT |      | 5     | 6.2E-2  | 8.5E-1    |
| <input type="checkbox"/> | GOTERM_CC_DIRECT | <a href="#">PTW/PP1 phosphatase complex</a>                                                     | RT |      | 3     | 1.2E-1  | 5.2E-1    |
| <input type="checkbox"/> | GOTERM_BP_DIRECT | <a href="#">entrainment of circadian clock by photoperiod</a>                                   | RT |      | 4     | 2.0E-1  | 9.9E-1    |
| <input type="checkbox"/> | UP_SEQ_FEATURE   | metal ion-binding site:Iron                                                                     | RT |      | 9     | 2.7E-1  | 1.0E0     |
| <input type="checkbox"/> | KEGG_PATHWAY     | <a href="#">mRNA surveillance pathway</a>                                                       | RT |      | 9     | 7.0E-1  | 9.0E-1    |
| <input type="checkbox"/> | GOTERM_BP_DIRECT | <a href="#">circadian regulation of gene expression</a>                                         | RT |      | 4     | 8.0E-1  | 1.0E0     |
| <input type="checkbox"/> | GOTERM_BP_DIRECT | <a href="#">regulation of circadian rhythm</a>                                                  | RT |      | 3     | 8.0E-1  | 1.0E0     |
| <input type="checkbox"/> | GOTERM_CC_DIRECT | <a href="#">nuclear chromosome, telomeric region</a>                                            | RT |      | 6     | 8.9E-1  | 1.0E0     |
| <input type="checkbox"/> | KEGG_PATHWAY     | <a href="#">Insulin resistance</a>                                                              | RT |      | 9     | 8.9E-1  | 9.7E-1    |
| Annotation Cluster 52    |                  | Enrichment Score: 1.86                                                                          | G  |    | Count | P_Value | Benjamini |
| <input type="checkbox"/> | GOTERM_BP_DIRECT | <a href="#">translational elongation</a>                                                        | RT |      | 8     | 5.3E-5  | 5.6E-3    |
| <input type="checkbox"/> | UP_KEYWORDS      | <a href="#">Elongation factor</a>                                                               | RT |      | 7     | 2.5E-4  | 1.0E-3    |
| <input type="checkbox"/> | GOTERM_MF_DIRECT | <a href="#">translation elongation factor activity</a>                                          | RT |      | 7     | 3.9E-3  | 8.4E-2    |
| <input type="checkbox"/> | GOTERM_CC_DIRECT | <a href="#">eukaryotic translation elongation factor 1 complex</a>                              | RT |      | 3     | 2.1E-2  | 1.7E-1    |
| <input type="checkbox"/> | INTERPRO         | <a href="#">Translation elongation factor EFTu/EF1A, domain 2</a>                               | RT |      | 3     | 2.8E-1  | 1.0E0     |
| <input type="checkbox"/> | INTERPRO         | <a href="#">Elongation factor, GTP-binding domain</a>                                           | RT |     | 3     | 4.6E-1  | 1.0E0     |
| <input type="checkbox"/> | INTERPRO         | <a href="#">Translation elongation/initiation factor/Ribosomal, beta-barrel</a>                 | RT |    | 3     | 6.5E-1  | 1.0E0     |
| Annotation Cluster 53    |                  | Enrichment Score: 1.82                                                                          | G  |  | Count | P_Value | Benjamini |
| <input type="checkbox"/> | UP_KEYWORDS      | <a href="#">Transmembrane beta strand</a>                                                       | RT |    | 5     | 1.1E-3  | 3.9E-3    |
| <input type="checkbox"/> | INTERPRO         | <a href="#">Porin domain</a>                                                                    | RT |    | 3     | 5.5E-2  | 7.3E-1    |
| <input type="checkbox"/> | INTERPRO         | <a href="#">Eukaryotic porin/Tom40</a>                                                          | RT |    | 3     | 5.5E-2  | 7.3E-1    |
| Annotation Cluster 54    |                  | Enrichment Score: 1.76                                                                          | G  |  | Count | P_Value | Benjamini |
| <input type="checkbox"/> | UP_KEYWORDS      | <a href="#">Protein biosynthesis</a>                                                            | RT |    | 23    | 1.2E-5  | 5.9E-5    |
| <input type="checkbox"/> | UP_KEYWORDS      | <a href="#">Ligase</a>                                                                          | RT |    | 26    | 5.0E-5  | 2.3E-4    |
| <input type="checkbox"/> | UP_KEYWORDS      | <a href="#">Aminoacyl-tRNA synthetase</a>                                                       | RT |    | 9     | 2.3E-3  | 7.7E-3    |
| <input type="checkbox"/> | INTERPRO         | <a href="#">Rossmann-like alpha/beta/alpha sandwich fold</a>                                    | RT |    | 8     | 4.9E-2  | 7.0E-1    |
| <input type="checkbox"/> | KEGG_PATHWAY     | <a href="#">Aminoacyl-tRNA biosynthesis</a>                                                     | RT |    | 9     | 8.2E-2  | 3.2E-1    |
| <input type="checkbox"/> | INTERPRO         | <a href="#">Aminoacyl-tRNA synthetase, class I, conserved site</a>                              | RT |    | 4     | 1.2E-1  | 9.2E-1    |
| <input type="checkbox"/> | INTERPRO         | <a href="#">Aminoacyl-tRNA synthetase, class II (G/ H/ P/ S), conserved domain</a>              | RT |    | 3     | 1.3E-1  | 9.4E-1    |
| <input type="checkbox"/> | INTERPRO         | <a href="#">Aminoacyl-tRNA synthetase, class II</a>                                             | RT |    | 4     | 1.5E-1  | 9.6E-1    |
| <input type="checkbox"/> | UP_SEQ_FEATURE   | short sequence motif:"KMSKS" region                                                             | RT |    | 3     | 3.8E-1  | 1.0E0     |
| <input type="checkbox"/> | UP_SEQ_FEATURE   | short sequence motif:"HIGH" region                                                              | RT |    | 3     | 4.6E-1  | 1.0E0     |
| Annotation Cluster 55    |                  | Enrichment Score: 1.76                                                                          | G  |  | Count | P_Value | Benjamini |
| <input type="checkbox"/> | UP_KEYWORDS      | <a href="#">Thiamine pyrophosphate</a>                                                          | RT |    | 5     | 5.5E-3  | 1.7E-2    |
| <input type="checkbox"/> | SMART            | <a href="#">SM00861</a>                                                                         | RT |    | 4     | 1.4E-2  | 2.1E-1    |
| <input type="checkbox"/> | INTERPRO         | <a href="#">Transketolase-like, pyrimidine-binding domain</a>                                   | RT |    | 4     | 2.2E-2  | 4.6E-1    |
| <input type="checkbox"/> | INTERPRO         | <a href="#">Transketolase, C-terminal/Pyruvate-ferredoxin oxidoreductase, domain II</a>         | RT |    | 3     | 5.5E-2  | 7.3E-1    |
| Annotation Cluster 56    |                  | Enrichment Score: 1.75                                                                          | G  |  | Count | P_Value | Benjamini |
| <input type="checkbox"/> | GOTERM_MF_DIRECT | <a href="#">serine-type endopeptidase activity</a>                                              | RT |    | 30    | 8.6E-5  | 3.9E-3    |
| <input type="checkbox"/> | UP_KEYWORDS      | <a href="#">Serine protease</a>                                                                 | RT |    | 21    | 1.6E-4  | 6.8E-4    |
| <input type="checkbox"/> | UP_SEQ_FEATURE   | active site:Charge relay system                                                                 | RT |    | 29    | 2.4E-4  | 5.5E-2    |

|                          | Annotation Cluster    | Enrichment Score                                                                |    |  | Count | P_Value | Benjamini |
|--------------------------|-----------------------|---------------------------------------------------------------------------------|----|--|-------|---------|-----------|
| <input type="checkbox"/> | SMART                 | Tryp_SPC                                                                        | RT |  | 13    | 8.1E-2  | 6.2E-1    |
| <input type="checkbox"/> | INTERPRO              | Trypsin-like cysteine/serine peptidase domain                                   | RT |  | 15    | 1.1E-1  | 9.1E-1    |
| <input type="checkbox"/> | UP_SEQ_FEATURE        | domain:Peptidase S1                                                             | RT |  | 13    | 1.3E-1  | 1.0E0     |
| <input type="checkbox"/> | INTERPRO              | Peptidase S1                                                                    | RT |  | 13    | 2.1E-1  | 9.8E-1    |
| <input type="checkbox"/> | INTERPRO              | Peptidase S1A, chymotrypsin-type                                                | RT |  | 10    | 4.7E-1  | 1.0E0     |
| <input type="checkbox"/> | INTERPRO              | Peptidase S1, trypsin family, active site                                       | RT |  | 9     | 4.8E-1  | 1.0E0     |
|                          | Annotation Cluster 57 | Enrichment Score: 1.74                                                          | G  |  | Count | P_Value | Benjamini |
| <input type="checkbox"/> | UP_KEYWORDS           | Glycosidase                                                                     | RT |  | 14    | 1.3E-3  | 4.5E-3    |
| <input type="checkbox"/> | KEGG_PATHWAY          | Other glycan degradation                                                        | RT |  | 7     | 1.2E-2  | 7.6E-2    |
| <input type="checkbox"/> | INTERPRO              | Glycoside hydrolase, superfamily                                                | RT |  | 10    | 1.4E-2  | 3.6E-1    |
| <input type="checkbox"/> | INTERPRO              | Glycoside hydrolase, catalytic domain                                           | RT |  | 7     | 4.6E-2  | 6.8E-1    |
| <input type="checkbox"/> | KEGG_PATHWAY          | Glycosaminoglycan degradation                                                   | RT |  | 5     | 2.0E-1  | 5.1E-1    |
|                          | Annotation Cluster 58 | Enrichment Score: 1.73                                                          | G  |  | Count | P_Value | Benjamini |
| <input type="checkbox"/> | UP_KEYWORDS           | Carboxypeptidase                                                                | RT |  | 7     | 2.6E-3  | 8.9E-3    |
| <input type="checkbox"/> | GOTERM_BP_DIRECT      | peptide catabolic process                                                       | RT |  | 7     | 5.3E-3  | 2.5E-1    |
| <input type="checkbox"/> | GOTERM_MF_DIRECT      | carboxypeptidase activity                                                       | RT |  | 3     | 6.8E-2  | 5.9E-1    |
| <input type="checkbox"/> | GOTERM_MF_DIRECT      | metalloidpeptidase activity                                                     | RT |  | 3     | 1.3E-1  | 7.8E-1    |
|                          | Annotation Cluster 59 | Enrichment Score: 1.72                                                          | G  |  | Count | P_Value | Benjamini |
| <input type="checkbox"/> | UP_KEYWORDS           | Growth factor binding                                                           | RT |  | 6     | 5.5E-4  | 2.0E-3    |
| <input type="checkbox"/> | SMART                 | IB                                                                              | RT |  | 6     | 4.6E-3  | 8.9E-2    |
| <input type="checkbox"/> | INTERPRO              | Insulin-like growth factor binding protein                                      | RT |  | 4     | 8.7E-3  | 2.7E-1    |
| <input type="checkbox"/> | INTERPRO              | Insulin-like growth factor-binding protein family 1-6, chordata                 | RT |  | 4     | 8.7E-3  | 2.7E-1    |
| <input type="checkbox"/> | GOTERM_MF_DIRECT      | insulin-like growth factor II binding                                           | RT |  | 4     | 1.2E-2  | 2.0E-1    |
| <input type="checkbox"/> | GOTERM_MF_DIRECT      | insulin-like growth factor I binding                                            | RT |  | 4     | 1.2E-2  | 2.0E-1    |
| <input type="checkbox"/> | INTERPRO              | Insulin-like growth factor binding protein, N-terminal, Cys-rich conserved site | RT |  | 4     | 1.4E-2  | 3.7E-1    |
| <input type="checkbox"/> | INTERPRO              | Insulin-like growth factor-binding protein, IGFBP                               | RT |  | 6     | 1.5E-2  | 3.7E-1    |
| <input type="checkbox"/> | SMART                 | TY                                                                              | RT |  | 5     | 1.6E-2  | 2.4E-1    |
| <input type="checkbox"/> | INTERPRO              | Thyroglobulin type-1                                                            | RT |  | 5     | 2.8E-2  | 5.3E-1    |
| <input type="checkbox"/> | GOTERM_BP_DIRECT      | positive regulation of insulin-like growth factor receptor signaling pathway    | RT |  | 4     | 3.0E-2  | 6.6E-1    |
| <input type="checkbox"/> | GOTERM_BP_DIRECT      | regulation of insulin-like growth factor receptor signaling pathway             | RT |  | 4     | 3.0E-2  | 6.6E-1    |
| <input type="checkbox"/> | UP_SEQ_FEATURE        | domain:Thyroglobulin type-1                                                     | RT |  | 5     | 4.3E-2  | 9.6E-1    |
| <input type="checkbox"/> | GOTERM_BP_DIRECT      | regulation of glucose metabolic process                                         | RT |  | 5     | 6.2E-2  | 8.5E-1    |
| <input type="checkbox"/> | UP_SEQ_FEATURE        | domain:IGFBP N-terminal                                                         | RT |  | 5     | 7.1E-2  | 9.9E-1    |
| <input type="checkbox"/> | GOTERM_BP_DIRECT      | regulation of cell growth                                                       | RT |  | 7     | 1.0E-1  | 9.3E-1    |
| <input type="checkbox"/> | GOTERM_BP_DIRECT      | type B pancreatic cell proliferation                                            | RT |  | 3     | 1.3E-1  | 9.6E-1    |
|                          | Annotation Cluster 60 | Enrichment Score: 1.7                                                           | G  |  | Count | P_Value | Benjamini |
| <input type="checkbox"/> | INTERPRO              | Biotin/lipoyl attachment                                                        | RT |  | 5     | 6.0E-3  | 2.1E-1    |
| <input type="checkbox"/> | INTERPRO              | Single hybrid motif                                                             | RT |  | 5     | 8.8E-3  | 2.7E-1    |
| <input type="checkbox"/> | UP_KEYWORDS           | Lipoyl                                                                          | RT |  | 3     | 5.3E-2  | 1.3E-1    |
| <input type="checkbox"/> | INTERPRO              | 2-oxo acid dehydrogenase, lipoyl-binding site                                   | RT |  | 3     | 5.5E-2  | 7.3E-1    |
|                          | Annotation Cluster 61 | Enrichment Score: 1.7                                                           | G  |  | Count | P_Value | Benjamini |
| <input type="checkbox"/> | UP_SEQ_FEATURE        | metal ion-binding site:Magnesium 2                                              | RT |  | 12    | 5.9E-4  | 9.6E-2    |
| <input type="checkbox"/> | UP_SEQ_FEATURE        | metal ion-binding site:Magnesium 1                                              | RT |  | 13    | 6.8E-4  | 1.1E-1    |
| <input type="checkbox"/> | INTERPRO              | Inositol monophosphatase                                                        | RT |  | 4     | 4.6E-3  | 1.9E-1    |
| <input type="checkbox"/> | INTERPRO              | Inositol monophosphatase, conserved site                                        | RT |  | 4     | 4.6E-3  | 1.9E-1    |
| <input type="checkbox"/> | UP_SEQ_FEATURE        | metal ion-binding site:Magnesium 1; via carbonyl oxygen                         | RT |  | 5     | 8.8E-3  | 6.2E-1    |
| <input type="checkbox"/> | UP_KEYWORDS           | Lithium                                                                         | RT |  | 3     | 1.8E-2  | 4.9E-2    |
| <input type="checkbox"/> | INTERPRO              | Inositol monophosphatase, metal-binding site                                    | RT |  | 3     | 3.5E-2  | 5.9E-1    |
| <input type="checkbox"/> | GOTERM_BP_DIRECT      | phosphatidylinositol phosphorylation                                            | RT |  | 4     | 3.2E-1  | 1.0E0     |
| <input type="checkbox"/> | KEGG_PATHWAY          | Inositol phosphate metabolism                                                   | RT |  | 7     | 7.4E-1  | 9.1E-1    |
| <input type="checkbox"/> | KEGG_PATHWAY          | Phosphatidylinositol signaling system                                           | RT |  | 6     | 9.8E-1  | 1.0E0     |

| Annotation Cluster 1     |                  | Enrichment Score: 57.69                                                                                 | G  |     | Count | P_Value | Benjamini |
|--------------------------|------------------|---------------------------------------------------------------------------------------------------------|----|---------------------------------------------------------------------------------------|-------|---------|-----------|
| Annotation Cluster 62    |                  | Enrichment Score: 1.67                                                                                  | G  |    | Count | P_Value | Benjamini |
| <input type="checkbox"/> | INTERPRO         | <a href="#">Thioredoxin domain</a>                                                                      | RT |      | 12    | 1.4E-4  | 1.2E-2    |
| <input type="checkbox"/> | GOTERM_BP_DIRECT | <a href="#">response to endoplasmic reticulum stress</a>                                                | RT |      | 10    | 2.1E-2  | 5.6E-1    |
| <input type="checkbox"/> | INTERPRO         | <a href="#">Protein disulphide isomerase</a>                                                            | RT |      | 3     | 3.5E-2  | 5.9E-1    |
| <input type="checkbox"/> | INTERPRO         | <a href="#">Disulphide isomerase</a>                                                                    | RT |      | 3     | 3.5E-2  | 5.9E-1    |
| <input type="checkbox"/> | INTERPRO         | <a href="#">Thioredoxin, conserved site</a>                                                             | RT |      | 5     | 4.3E-2  | 6.6E-1    |
| <input type="checkbox"/> | GOTERM_MF_DIRECT | <a href="#">protein disulfide isomerase activity</a>                                                    | RT |      | 5     | 6.1E-2  | 5.5E-1    |
| <input type="checkbox"/> | UP_SEQ_FEATURE   | domain:Thioredoxin 1                                                                                    | RT |      | 4     | 7.0E-2  | 9.9E-1    |
| <input type="checkbox"/> | UP_SEQ_FEATURE   | domain:Thioredoxin 2                                                                                    | RT |      | 4     | 7.0E-2  | 9.9E-1    |
| Annotation Cluster 63    |                  | Enrichment Score: 1.65                                                                                  | G  |    | Count | P_Value | Benjamini |
| <input type="checkbox"/> | GOTERM_MF_DIRECT | <a href="#">growth factor activity</a>                                                                  | RT |      | 15    | 4.7E-3  | 9.6E-2    |
| <input type="checkbox"/> | UP_KEYWORDS      | <a href="#">Mitogen</a>                                                                                 | RT |      | 6     | 1.4E-2  | 3.9E-2    |
| <input type="checkbox"/> | UP_KEYWORDS      | <a href="#">Growth factor</a>                                                                           | RT |      | 14    | 5.4E-2  | 1.3E-1    |
| <input type="checkbox"/> | GOTERM_BP_DIRECT | <a href="#">positive regulation of cell division</a>                                                    | RT |      | 6     | 7.1E-2  | 8.7E-1    |
| Annotation Cluster 64    |                  | Enrichment Score: 1.58                                                                                  | G  |    | Count | P_Value | Benjamini |
| <input type="checkbox"/> | INTERPRO         | <a href="#">Carbon-nitrogen hydrolase</a>                                                               | RT |      | 4     | 1.4E-2  | 3.7E-1    |
| <input type="checkbox"/> | GOTERM_BP_DIRECT | <a href="#">nitrogen compound metabolic process</a>                                                     | RT |      | 5     | 1.8E-2  | 5.3E-1    |
| <input type="checkbox"/> | UP_SEQ_FEATURE   | domain:CN hydrolase                                                                                     | RT |      | 4     | 7.0E-2  | 9.9E-1    |
| Annotation Cluster 65    |                  | Enrichment Score: 1.57                                                                                  | G  |    | Count | P_Value | Benjamini |
| <input type="checkbox"/> | UP_KEYWORDS      | <a href="#">Multifunctional enzyme</a>                                                                  | RT |      | 9     | 3.5E-4  | 1.4E-3    |
| <input type="checkbox"/> | INTERPRO         | <a href="#">ATP-grasp fold, subdomain 2</a>                                                             | RT |      | 6     | 1.2E-2  | 3.4E-1    |
| <input type="checkbox"/> | INTERPRO         | <a href="#">ATP-grasp fold, subdomain 1</a>                                                             | RT |      | 5     | 2.8E-2  | 5.3E-1    |
| <input type="checkbox"/> | UP_SEQ_FEATURE   | domain:ATP-grasp                                                                                        | RT |      | 5     | 4.3E-2  | 9.6E-1    |
| <input type="checkbox"/> | INTERPRO         | <a href="#">Rudiment single hybrid motif</a>                                                            | RT |      | 3     | 7.9E-2  | 8.4E-1    |
| <input type="checkbox"/> | INTERPRO         | <a href="#">ATP-grasp fold</a>                                                                          | RT |      | 4     | 8.2E-2  | 8.5E-1    |
| <input type="checkbox"/> | INTERPRO         | <a href="#">Pre-ATP-grasp domain</a>                                                                    | RT |      | 3     | 3.1E-1  | 1.0E0     |
| Annotation Cluster 66    |                  | Enrichment Score: 1.54                                                                                  | G  |  | Count | P_Value | Benjamini |
| <input type="checkbox"/> | UP_KEYWORDS      | <a href="#">Flavoprotein</a>                                                                            | RT |    | 21    | 7.5E-6  | 3.8E-5    |
| <input type="checkbox"/> | UP_KEYWORDS      | <a href="#">FAD</a>                                                                                     | RT |    | 20    | 1.1E-5  | 5.4E-5    |
| <input type="checkbox"/> | GOTERM_BP_DIRECT | <a href="#">fatty acid beta-oxidation using acyl-CoA dehydrogenase</a>                                  | RT |    | 7     | 2.8E-3  | 1.6E-1    |
| <input type="checkbox"/> | COG_ONTOLOGY     | <a href="#">Lipid metabolism</a>                                                                        | RT |    | 11    | 6.3E-3  | 5.6E-2    |
| <input type="checkbox"/> | UP_SEQ_FEATURE   | nucleotide phosphate-binding region:FAD                                                                 | RT |    | 12    | 2.5E-2  | 8.9E-1    |
| <input type="checkbox"/> | INTERPRO         | <a href="#">Acyl-CoA dehydrogenase, conserved site</a>                                                  | RT |    | 4     | 3.1E-2  | 5.5E-1    |
| <input type="checkbox"/> | GOTERM_MF_DIRECT | <a href="#">fatty-acyl-CoA binding</a>                                                                  | RT |    | 6     | 7.0E-2  | 5.9E-1    |
| <input type="checkbox"/> | INTERPRO         | <a href="#">Acyl-CoA dehydrogenase/oxidase, N-terminal</a>                                              | RT |    | 4     | 8.2E-2  | 8.5E-1    |
| <input type="checkbox"/> | INTERPRO         | <a href="#">Acyl-CoA oxidase/dehydrogenase, central domain</a>                                          | RT |    | 4     | 8.2E-2  | 8.5E-1    |
| <input type="checkbox"/> | INTERPRO         | <a href="#">Acyl-CoA dehydrogenase/oxidase C-terminal</a>                                               | RT |    | 4     | 9.8E-2  | 8.9E-1    |
| <input type="checkbox"/> | INTERPRO         | <a href="#">Acyl-CoA dehydrogenase/oxidase</a>                                                          | RT |    | 4     | 9.8E-2  | 8.9E-1    |
| <input type="checkbox"/> | GOTERM_BP_DIRECT | <a href="#">lipid homeostasis</a>                                                                       | RT |    | 6     | 1.2E-1  | 9.4E-1    |
| <input type="checkbox"/> | GOTERM_MF_DIRECT | <a href="#">oxidoreductase activity, acting on the CH-CH group of donors, with a flavin as acceptor</a> | RT |    | 4     | 1.3E-1  | 7.8E-1    |
| <input type="checkbox"/> | GOTERM_MF_DIRECT | <a href="#">flavin adenine dinucleotide binding</a>                                                     | RT |    | 9     | 1.7E-1  | 8.6E-1    |
| <input type="checkbox"/> | UP_SEQ_FEATURE   | binding site:Substrate; via amide nitrogen                                                              | RT |    | 6     | 2.0E-1  | 1.0E0     |
| <input type="checkbox"/> | GOTERM_MF_DIRECT | <a href="#">acyl-CoA dehydrogenase activity</a>                                                         | RT |    | 3     | 3.3E-1  | 9.7E-1    |
| <input type="checkbox"/> | UP_SEQ_FEATURE   | binding site:FAD                                                                                        | RT |    | 4     | 3.7E-1  | 1.0E0     |
| <input type="checkbox"/> | UP_SEQ_FEATURE   | binding site:Substrate; via carbonyl oxygen                                                             | RT |    | 5     | 5.1E-1  | 1.0E0     |
| Annotation Cluster 67    |                  | Enrichment Score: 1.53                                                                                  | G  |  | Count | P_Value | Benjamini |
| <input type="checkbox"/> | GOTERM_BP_DIRECT | <a href="#">nucleotide biosynthetic process</a>                                                         | RT |    | 5     | 5.9E-3  | 2.7E-1    |
| <input type="checkbox"/> | INTERPRO         | <a href="#">Phosphoribosyltransferase domain</a>                                                        | RT |    | 5     | 1.2E-2  | 3.4E-1    |
| <input type="checkbox"/> | UP_KEYWORDS      | <a href="#">Nucleotide biosynthesis</a>                                                                 | RT |    | 3     | 3.4E-2  | 8.6E-2    |
| <input type="checkbox"/> | INTERPRO         | <a href="#">Ribose-phosphate diphosphokinase</a>                                                        | RT |    | 3     | 5.5E-2  | 7.3E-1    |
| <input type="checkbox"/> | GOTERM_MF_DIRECT | <a href="#">ribose phosphate diphosphokinase activity</a>                                               | RT |    | 3     | 6.8E-2  | 5.9E-1    |
| <input type="checkbox"/> | GOTERM_BP_DIRECT | <a href="#">nucleoside metabolic process</a>                                                            | RT |    | 4     | 7.1E-2  | 8.7E-1    |

| Annotation Cluster 1     |                  | Enrichment Score: 57.69                                                                 | <b>G</b>           |     | Count | P_Value | Benjamini |
|--------------------------|------------------|-----------------------------------------------------------------------------------------|--------------------|---------------------------------------------------------------------------------------|-------|---------|-----------|
| Annotation Cluster 68    |                  | Enrichment Score: 1.48                                                                  | <b>G</b>           |    | Count | P_Value | Benjamini |
| <input type="checkbox"/> | UP_KEYWORDS      | <a href="#">HDL</a>                                                                     | <a href="#">RT</a> |      | 7     | 2.5E-4  | 1.0E-3    |
| <input type="checkbox"/> | UP_KEYWORDS      | <a href="#">Lipid transport</a>                                                         | <a href="#">RT</a> |      | 12    | 3.1E-4  | 1.2E-3    |
| <input type="checkbox"/> | GOTERM_CC_DIRECT | <a href="#">chylomicron</a>                                                             | <a href="#">RT</a> |      | 5     | 3.0E-3  | 3.3E-2    |
| <input type="checkbox"/> | GOTERM_CC_DIRECT | <a href="#">very-low-density lipoprotein particle</a>                                   | <a href="#">RT</a> |      | 6     | 3.5E-3  | 3.7E-2    |
| <input type="checkbox"/> | GOTERM_MF_DIRECT | <a href="#">phosphatidylcholine-sterol O-acyltransferase activator activity</a>         | <a href="#">RT</a> |      | 4     | 6.4E-3  | 1.2E-1    |
| <input type="checkbox"/> | GOTERM_CC_DIRECT | <a href="#">high-density lipoprotein particle</a>                                       | <a href="#">RT</a> |      | 6     | 7.1E-3  | 7.1E-2    |
| <input type="checkbox"/> | GOTERM_CC_DIRECT | <a href="#">spherical high-density lipoprotein particle</a>                             | <a href="#">RT</a> |      | 4     | 1.1E-2  | 9.9E-2    |
| <input type="checkbox"/> | GOTERM_BP_DIRECT | <a href="#">neuron projection regeneration</a>                                          | <a href="#">RT</a> |      | 4     | 1.2E-2  | 4.2E-1    |
| <input type="checkbox"/> | GOTERM_BP_DIRECT | <a href="#">phospholipid efflux</a>                                                     | <a href="#">RT</a> |      | 5     | 1.8E-2  | 5.3E-1    |
| <input type="checkbox"/> | GOTERM_BP_DIRECT | <a href="#">positive regulation of cholesterol esterification</a>                       | <a href="#">RT</a> |      | 4     | 2.0E-2  | 5.4E-1    |
| <input type="checkbox"/> | GOTERM_MF_DIRECT | <a href="#">high-density lipoprotein particle receptor binding</a>                      | <a href="#">RT</a> |      | 3     | 2.3E-2  | 3.3E-1    |
| <input type="checkbox"/> | GOTERM_BP_DIRECT | <a href="#">negative regulation of very-low-density lipoprotein particle remodeling</a> | <a href="#">RT</a> |      | 3     | 2.3E-2  | 5.9E-1    |
| <input type="checkbox"/> | GOTERM_BP_DIRECT | <a href="#">high-density lipoprotein particle assembly</a>                              | <a href="#">RT</a> |      | 4     | 3.0E-2  | 6.6E-1    |
| <input type="checkbox"/> | GOTERM_BP_DIRECT | <a href="#">lipoprotein metabolic process</a>                                           | <a href="#">RT</a> |      | 5     | 4.1E-2  | 7.5E-1    |
| <input type="checkbox"/> | GOTERM_BP_DIRECT | <a href="#">triglyceride catabolic process</a>                                          | <a href="#">RT</a> |      | 5     | 5.1E-2  | 8.0E-1    |
| <input type="checkbox"/> | UP_KEYWORDS      | <a href="#">VLDL</a>                                                                    | <a href="#">RT</a> |      | 3     | 5.3E-2  | 1.3E-1    |
| <input type="checkbox"/> | UP_KEYWORDS      | <a href="#">Chylomicron</a>                                                             | <a href="#">RT</a> |      | 3     | 5.3E-2  | 1.3E-1    |
| <input type="checkbox"/> | INTERPRO         | <a href="#">Apolipoprotein A1/A4/E</a>                                                  | <a href="#">RT</a> |      | 3     | 5.5E-2  | 7.3E-1    |
| <input type="checkbox"/> | GOTERM_BP_DIRECT | <a href="#">cholesterol efflux</a>                                                      | <a href="#">RT</a> |      | 6     | 6.1E-2  | 8.5E-1    |
| <input type="checkbox"/> | GOTERM_BP_DIRECT | <a href="#">regulation of intestinal cholesterol absorption</a>                         | <a href="#">RT</a> |      | 3     | 6.8E-2  | 8.7E-1    |
| <input type="checkbox"/> | GOTERM_BP_DIRECT | <a href="#">reverse cholesterol transport</a>                                           | <a href="#">RT</a> |      | 4     | 7.1E-2  | 8.7E-1    |
| <input type="checkbox"/> | GOTERM_MF_DIRECT | <a href="#">cholesterol transporter activity</a>                                        | <a href="#">RT</a> |      | 4     | 8.8E-2  | 6.6E-1    |
| <input type="checkbox"/> | GOTERM_MF_DIRECT | <a href="#">cholesterol binding</a>                                                     | <a href="#">RT</a> |      | 6     | 1.2E-1  | 7.5E-1    |
| <input type="checkbox"/> | GOTERM_MF_DIRECT | <a href="#">phospholipid binding</a>                                                    | <a href="#">RT</a> |    | 8     | 1.2E-1  | 7.6E-1    |
| <input type="checkbox"/> | GOTERM_BP_DIRECT | <a href="#">very-low-density lipoprotein particle remodeling</a>                        | <a href="#">RT</a> |    | 3     | 1.3E-1  | 9.6E-1    |
| <input type="checkbox"/> | GOTERM_MF_DIRECT | <a href="#">phosphatidylcholine binding</a>                                             | <a href="#">RT</a> |    | 4     | 1.5E-1  | 8.2E-1    |
| <input type="checkbox"/> | GOTERM_BP_DIRECT | <a href="#">cholesterol biosynthetic process</a>                                        | <a href="#">RT</a> |    | 5     | 1.7E-1  | 9.8E-1    |
| <input type="checkbox"/> | GOTERM_BP_DIRECT | <a href="#">triglyceride homeostasis</a>                                                | <a href="#">RT</a> |    | 4     | 1.7E-1  | 9.8E-1    |
| <input type="checkbox"/> | GOTERM_BP_DIRECT | <a href="#">cholesterol metabolic process</a>                                           | <a href="#">RT</a> |    | 6     | 1.9E-1  | 9.9E-1    |
| <input type="checkbox"/> | GOTERM_BP_DIRECT | <a href="#">high-density lipoprotein particle remodeling</a>                            | <a href="#">RT</a> |    | 3     | 2.3E-1  | 9.9E-1    |
| <input type="checkbox"/> | GOTERM_BP_DIRECT | <a href="#">cholesterol homeostasis</a>                                                 | <a href="#">RT</a> |    | 7     | 2.5E-1  | 9.9E-1    |
| <input type="checkbox"/> | GOTERM_BP_DIRECT | <a href="#">lipid transport</a>                                                         | <a href="#">RT</a> |    | 6     | 3.0E-1  | 1.0E0     |
| Annotation Cluster 69    |                  | Enrichment Score: 1.47                                                                  | <b>G</b>           |  | Count | P_Value | Benjamini |
| <input type="checkbox"/> | UP_KEYWORDS      | <a href="#">Actin capping</a>                                                           | <a href="#">RT</a> |    | 7     | 3.8E-5  | 1.8E-4    |
| <input type="checkbox"/> | GOTERM_BP_DIRECT | <a href="#">actin filament severing</a>                                                 | <a href="#">RT</a> |    | 4     | 1.2E-2  | 4.2E-1    |
| <input type="checkbox"/> | GOTERM_BP_DIRECT | <a href="#">barbed-end actin filament capping</a>                                       | <a href="#">RT</a> |    | 5     | 1.3E-2  | 4.4E-1    |
| <input type="checkbox"/> | SMART            | <a href="#">GEL</a>                                                                     | <a href="#">RT</a> |    | 4     | 1.4E-2  | 2.1E-1    |
| <input type="checkbox"/> | INTERPRO         | <a href="#">Villin/Gelsolin</a>                                                         | <a href="#">RT</a> |    | 4     | 2.2E-2  | 4.6E-1    |
| <input type="checkbox"/> | GOTERM_BP_DIRECT | <a href="#">actin nucleation</a>                                                        | <a href="#">RT</a> |    | 3     | 6.8E-2  | 8.7E-1    |
| <input type="checkbox"/> | UP_SEQ_FEATURE   | repeat:Gelsolin-like 2                                                                  | <a href="#">RT</a> |    | 4     | 7.0E-2  | 9.9E-1    |
| <input type="checkbox"/> | UP_SEQ_FEATURE   | repeat:Gelsolin-like 3                                                                  | <a href="#">RT</a> |    | 4     | 7.0E-2  | 9.9E-1    |
| <input type="checkbox"/> | UP_SEQ_FEATURE   | repeat:Gelsolin-like 1                                                                  | <a href="#">RT</a> |    | 4     | 7.0E-2  | 9.9E-1    |
| <input type="checkbox"/> | INTERPRO         | <a href="#">Gelsolin domain</a>                                                         | <a href="#">RT</a> |    | 4     | 9.8E-2  | 8.9E-1    |
| <input type="checkbox"/> | UP_SEQ_FEATURE   | repeat:Gelsolin-like 6                                                                  | <a href="#">RT</a> |    | 3     | 1.2E-1  | 1.0E0     |
| <input type="checkbox"/> | UP_SEQ_FEATURE   | region of interest:Polyphosphoinositide binding                                         | <a href="#">RT</a> |    | 3     | 1.2E-1  | 1.0E0     |
| <input type="checkbox"/> | UP_SEQ_FEATURE   | repeat:Gelsolin-like 5                                                                  | <a href="#">RT</a> |    | 3     | 2.0E-1  | 1.0E0     |
| <input type="checkbox"/> | UP_SEQ_FEATURE   | repeat:Gelsolin-like 4                                                                  | <a href="#">RT</a> |    | 3     | 2.0E-1  | 1.0E0     |
| Annotation Cluster 70    |                  | Enrichment Score: 1.46                                                                  | <b>G</b>           |  | Count | P_Value | Benjamini |
| <input type="checkbox"/> | INTERPRO         | <a href="#">Peptidase M16, N-terminal</a>                                               | <a href="#">RT</a> |    | 4     | 1.4E-2  | 3.7E-1    |
| <input type="checkbox"/> | INTERPRO         | <a href="#">Metalloenzyme, LuxS/M16 peptidase-like</a>                                  | <a href="#">RT</a> |    | 4     | 1.4E-2  | 3.7E-1    |

|                          | Annotation Cluster    | Enrichment Score                                           |    |  | Count | P_Value | Benjamini |
|--------------------------|-----------------------|------------------------------------------------------------|----|--|-------|---------|-----------|
| <input type="checkbox"/> | INTERPRO              | Peptidase M16 domain                                       | RT |  | 4     | 1.4E-2  | 3.7E-1    |
| <input type="checkbox"/> | INTERPRO              | Peptidase M16, C-terminal domain                           | RT |  | 4     | 1.4E-2  | 3.7E-1    |
| <input type="checkbox"/> | INTERPRO              | Peptidase M16, zinc-binding site                           | RT |  | 3     | 5.5E-2  | 7.3E-1    |
| <input type="checkbox"/> | GOTERM_MF_DIRECT      | metalloendopeptidase activity                              | RT |  | 9     | 6.9E-1  | 1.0E0     |
|                          | Annotation Cluster 71 | Enrichment Score: 1.45                                     | G  |  | Count | P_Value | Benjamini |
| <input type="checkbox"/> | UP_KEYWORDS           | Metalloprotease inhibitor                                  | RT |  | 4     | 2.0E-2  | 5.5E-2    |
| <input type="checkbox"/> | UP_KEYWORDS           | Metalloenzyme inhibitor                                    | RT |  | 4     | 2.0E-2  | 5.5E-2    |
| <input type="checkbox"/> | GOTERM_MF_DIRECT      | metalloendopeptidase inhibitor activity                    | RT |  | 4     | 1.1E-1  | 7.3E-1    |
|                          | Annotation Cluster 72 | Enrichment Score: 1.45                                     | G  |  | Count | P_Value | Benjamini |
| <input type="checkbox"/> | GOTERM_BP_DIRECT      | fibrinolysis                                               | RT |  | 8     | 9.7E-5  | 9.4E-3    |
| <input type="checkbox"/> | INTERPRO              | Kringle-like fold                                          | RT |  | 9     | 7.4E-4  | 4.3E-2    |
| <input type="checkbox"/> | SMART                 | KR                                                         | RT |  | 4     | 6.6E-2  | 6.0E-1    |
| <input type="checkbox"/> | UP_KEYWORDS           | Kringle                                                    | RT |  | 4     | 9.3E-2  | 2.1E-1    |
| <input type="checkbox"/> | INTERPRO              | Kringle                                                    | RT |  | 4     | 9.8E-2  | 8.9E-1    |
| <input type="checkbox"/> | INTERPRO              | Kringle, conserved site                                    | RT |  | 3     | 2.8E-1  | 1.0E0     |
| <input type="checkbox"/> | INTERPRO              | Peptidase S1A, chymotrypsin-type                           | RT |  | 10    | 4.7E-1  | 1.0E0     |
| <input type="checkbox"/> | INTERPRO              | Peptidase S1, trypsin family, active site                  | RT |  | 9     | 4.8E-1  | 1.0E0     |
|                          | Annotation Cluster 73 | Enrichment Score: 1.38                                     | G  |  | Count | P_Value | Benjamini |
| <input type="checkbox"/> | GOTERM_BP_DIRECT      | chaperone mediated protein folding independent of cofactor | RT |  | 5     | 3.5E-3  | 1.9E-1    |
| <input type="checkbox"/> | GOTERM_CC_DIRECT      | prefoldin complex                                          | RT |  | 3     | 1.2E-1  | 5.2E-1    |
| <input type="checkbox"/> | INTERPRO              | Prefoldin                                                  | RT |  | 4     | 1.7E-1  | 9.7E-1    |
|                          | Annotation Cluster 74 | Enrichment Score: 1.36                                     | G  |  | Count | P_Value | Benjamini |
| <input type="checkbox"/> | GOTERM_MF_DIRECT      | protein heterodimerization activity                        | RT |  | 23    | 3.4E-4  | 1.1E-2    |
| <input type="checkbox"/> | UP_KEYWORDS           | Nucleosome core                                            | RT |  | 17    | 2.7E-3  | 9.0E-3    |
| <input type="checkbox"/> | UP_KEYWORDS           | Chromosome                                                 | RT |  | 28    | 7.7E-3  | 2.4E-2    |
| <input type="checkbox"/> | UP_KEYWORDS           | Citrullination                                             | RT |  | 10    | 8.9E-3  | 2.6E-2    |
| <input type="checkbox"/> | GOTERM_CC_DIRECT      | nucleosome                                                 | RT |  | 14    | 1.5E-2  | 1.3E-1    |
| <input type="checkbox"/> | INTERPRO              | Histone core                                               | RT |  | 14    | 1.5E-2  | 3.7E-1    |
| <input type="checkbox"/> | SMART                 | H3                                                         | RT |  | 5     | 2.5E-2  | 3.2E-1    |
| <input type="checkbox"/> | INTERPRO              | Histone H3                                                 | RT |  | 5     | 4.3E-2  | 6.6E-1    |
| <input type="checkbox"/> | INTERPRO              | Histone-fold                                               | RT |  | 16    | 4.7E-2  | 6.8E-1    |
| <input type="checkbox"/> | KEGG_PATHWAY          | Systemic lupus erythematosus                               | RT |  | 23    | 2.0E-1  | 5.1E-1    |
| <input type="checkbox"/> | GOTERM_MF_DIRECT      | nucleosomal DNA binding                                    | RT |  | 5     | 2.2E-1  | 9.2E-1    |
| <input type="checkbox"/> | KEGG_PATHWAY          | Alcoholism                                                 | RT |  | 26    | 2.7E-1  | 6.1E-1    |
| <input type="checkbox"/> | GOTERM_BP_DIRECT      | nucleosome assembly                                        | RT |  | 11    | 5.7E-1  | 1.0E0     |
| <input type="checkbox"/> | KEGG_PATHWAY          | Transcriptional misregulation in cancer                    | RT |  | 14    | 9.0E-1  | 9.7E-1    |
| <input type="checkbox"/> | UP_KEYWORDS           | DNA-binding                                                | RT |  | 33    | 1.0E0   | 1.0E0     |
|                          | Annotation Cluster 75 | Enrichment Score: 1.33                                     | G  |  | Count | P_Value | Benjamini |
| <input type="checkbox"/> | GOTERM_MF_DIRECT      | chondroitin sulfate binding                                | RT |  | 4     | 6.4E-3  | 1.2E-1    |
| <input type="checkbox"/> | SMART                 | ANX                                                        | RT |  | 5     | 6.9E-3  | 1.2E-1    |
| <input type="checkbox"/> | UP_KEYWORDS           | Calcium/phospholipid-binding                               | RT |  | 5     | 8.1E-3  | 2.5E-2    |
| <input type="checkbox"/> | UP_KEYWORDS           | Annexin                                                    | RT |  | 5     | 1.1E-2  | 3.3E-2    |
| <input type="checkbox"/> | INTERPRO              | Annexin repeat, conserved site                             | RT |  | 5     | 1.2E-2  | 3.4E-1    |
| <input type="checkbox"/> | INTERPRO              | Annexin repeat                                             | RT |  | 5     | 1.2E-2  | 3.4E-1    |
| <input type="checkbox"/> | INTERPRO              | Annexin                                                    | RT |  | 5     | 1.2E-2  | 3.4E-1    |
| <input type="checkbox"/> | GOTERM_MF_DIRECT      | calcium-dependent protein binding                          | RT |  | 5     | 5.0E-2  | 4.9E-1    |
| <input type="checkbox"/> | UP_SEQ_FEATURE        | repeat:Annexin 4                                           | RT |  | 5     | 2.5E-1  | 1.0E0     |
| <input type="checkbox"/> | UP_SEQ_FEATURE        | repeat:Annexin 2                                           | RT |  | 5     | 2.5E-1  | 1.0E0     |
| <input type="checkbox"/> | UP_SEQ_FEATURE        | repeat:Annexin 3                                           | RT |  | 5     | 2.5E-1  | 1.0E0     |
| <input type="checkbox"/> | UP_SEQ_FEATURE        | repeat:Annexin 1                                           | RT |  | 5     | 2.5E-1  | 1.0E0     |
| <input type="checkbox"/> | GOTERM_BP_DIRECT      | calcium ion transmembrane transport                        | RT |  | 5     | 3.3E-1  | 1.0E0     |
| <input type="checkbox"/> | GOTERM_MF_DIRECT      | calcium-dependent phospholipid binding                     | RT |  | 5     | 5.3E-1  | 1.0E0     |
|                          | Annotation Cluster 76 | Enrichment Score: 1.32                                     | G  |  | Count | P_Value | Benjamini |

|                          | Annotation Cluster    | Enrichment Score                                                                     |    |  | Count | P_Value | Benjamini |
|--------------------------|-----------------------|--------------------------------------------------------------------------------------|----|--|-------|---------|-----------|
| <input type="checkbox"/> | INTERPRO              | <a href="#">Lipocalin/cytosolic fatty-acid binding protein domain</a>                | RT |  | 8     | 2.0E-2  | 4.4E-1    |
| <input type="checkbox"/> | INTERPRO              | <a href="#">Calycin</a>                                                              | RT |  | 8     | 2.7E-2  | 5.2E-1    |
| <input type="checkbox"/> | INTERPRO              | <a href="#">Calycin-like</a>                                                         | RT |  | 8     | 3.5E-2  | 5.9E-1    |
| <input type="checkbox"/> | GOTERM_MF_DIRECT      | <a href="#">small molecule binding</a>                                               | RT |  | 4     | 4.1E-2  | 4.4E-1    |
| <input type="checkbox"/> | INTERPRO              | <a href="#">Lipocalin</a>                                                            | RT |  | 4     | 4.1E-2  | 6.5E-1    |
| <input type="checkbox"/> | INTERPRO              | <a href="#">Lipocalin conserved site</a>                                             | RT |  | 3     | 4.0E-1  | 1.0E0     |
|                          | Annotation Cluster 77 | Enrichment Score: 1.31                                                               | G  |  | Count | P_Value | Benjamini |
| <input type="checkbox"/> | UP_KEYWORDS           | <a href="#">Steroid metabolism</a>                                                   | RT |  | 8     | 9.2E-3  | 2.7E-2    |
| <input type="checkbox"/> | UP_KEYWORDS           | <a href="#">Sterol metabolism</a>                                                    | RT |  | 7     | 1.4E-2  | 3.9E-2    |
| <input type="checkbox"/> | UP_KEYWORDS           | <a href="#">Cholesterol metabolism</a>                                               | RT |  | 6     | 4.3E-2  | 1.1E-1    |
| <input type="checkbox"/> | UP_KEYWORDS           | <a href="#">Steroid biosynthesis</a>                                                 | RT |  | 4     | 1.7E-1  | 3.3E-1    |
| <input type="checkbox"/> | UP_KEYWORDS           | <a href="#">Sterol biosynthesis</a>                                                  | RT |  | 3     | 3.0E-1  | 5.2E-1    |
|                          | Annotation Cluster 78 | Enrichment Score: 1.31                                                               | G  |  | Count | P_Value | Benjamini |
| <input type="checkbox"/> | UP_KEYWORDS           | <a href="#">Serine esterase</a>                                                      | RT |  | 6     | 5.5E-4  | 2.0E-3    |
| <input type="checkbox"/> | UP_SEQ_FEATURE        | active site:Acyl-ester intermediate                                                  | RT |  | 4     | 1.7E-1  | 1.0E0     |
| <input type="checkbox"/> | INTERPRO              | <a href="#">Carboxylesterase type B, active site</a>                                 | RT |  | 3     | 1.9E-1  | 9.8E-1    |
| <input type="checkbox"/> | INTERPRO              | <a href="#">Carboxylesterase, type B</a>                                             | RT |  | 3     | 3.1E-1  | 1.0E0     |
|                          | Annotation Cluster 79 | Enrichment Score: 1.29                                                               | G  |  | Count | P_Value | Benjamini |
| <input type="checkbox"/> | UP_KEYWORDS           | <a href="#">Dynein</a>                                                               | RT |  | 6     | 3.3E-3  | 1.1E-2    |
| <input type="checkbox"/> | GOTERM_MF_DIRECT      | <a href="#">motor activity</a>                                                       | RT |  | 9     | 4.2E-2  | 4.4E-1    |
| <input type="checkbox"/> | UP_KEYWORDS           | <a href="#">Motor protein</a>                                                        | RT |  | 12    | 6.6E-2  | 1.5E-1    |
| <input type="checkbox"/> | GOTERM_CC_DIRECT      | <a href="#">dynein complex</a>                                                       | RT |  | 5     | 9.1E-2  | 4.4E-1    |
| <input type="checkbox"/> | GOTERM_CC_DIRECT      | <a href="#">cytoplasmic dynein complex</a>                                           | RT |  | 3     | 4.1E-1  | 8.8E-1    |
|                          | Annotation Cluster 80 | Enrichment Score: 1.27                                                               | G  |  | Count | P_Value | Benjamini |
| <input type="checkbox"/> | INTERPRO              | <a href="#">Thiolase-like</a>                                                        | RT |  | 5     | 6.0E-3  | 2.1E-1    |
| <input type="checkbox"/> | INTERPRO              | <a href="#">Thiolase</a>                                                             | RT |  | 3     | 5.5E-2  | 7.3E-1    |
| <input type="checkbox"/> | INTERPRO              | <a href="#">Thiolase, active site</a>                                                | RT |  | 3     | 5.5E-2  | 7.3E-1    |
| <input type="checkbox"/> | INTERPRO              | <a href="#">Thiolase, acyl-enzyme intermediate active site</a>                       | RT |  | 3     | 5.5E-2  | 7.3E-1    |
| <input type="checkbox"/> | GOTERM_BP_DIRECT      | <a href="#">fatty acid beta-oxidation</a>                                            | RT |  | 7     | 6.5E-2  | 8.6E-1    |
| <input type="checkbox"/> | INTERPRO              | <a href="#">Thiolase, C-terminal</a>                                                 | RT |  | 3     | 7.9E-2  | 8.4E-1    |
| <input type="checkbox"/> | INTERPRO              | <a href="#">Thiolase, conserved site</a>                                             | RT |  | 3     | 7.9E-2  | 8.4E-1    |
| <input type="checkbox"/> | INTERPRO              | <a href="#">Thiolase, N-terminal</a>                                                 | RT |  | 3     | 7.9E-2  | 8.4E-1    |
| <input type="checkbox"/> | UP_SEQ_FEATURE        | active site:Acyl-thioester intermediate                                              | RT |  | 3     | 1.2E-1  | 1.0E0     |
|                          | Annotation Cluster 81 | Enrichment Score: 1.27                                                               | G  |  | Count | P_Value | Benjamini |
| <input type="checkbox"/> | UP_KEYWORDS           | <a href="#">Aminotransferase</a>                                                     | RT |  | 6     | 8.4E-3  | 2.5E-2    |
| <input type="checkbox"/> | INTERPRO              | <a href="#">Aspartate/other aminotransferase</a>                                     | RT |  | 3     | 1.9E-2  | 4.2E-1    |
| <input type="checkbox"/> | UP_KEYWORDS           | <a href="#">Pyridoxal phosphate</a>                                                  | RT |  | 10    | 1.9E-2  | 5.3E-2    |
| <input type="checkbox"/> | GOTERM_MF_DIRECT      | <a href="#">L-aspartate:2-oxoglutarate aminotransferase activity</a>                 | RT |  | 3     | 2.3E-2  | 3.3E-1    |
| <input type="checkbox"/> | GOTERM_MF_DIRECT      | <a href="#">pyridoxal phosphate binding</a>                                          | RT |  | 11    | 2.7E-2  | 3.5E-1    |
| <input type="checkbox"/> | GOTERM_BP_DIRECT      | <a href="#">aspartate biosynthetic process</a>                                       | RT |  | 3     | 6.8E-2  | 8.7E-1    |
| <input type="checkbox"/> | INTERPRO              | <a href="#">Pyridoxal phosphate-dependent transferase</a>                            | RT |  | 7     | 1.5E-1  | 9.6E-1    |
| <input type="checkbox"/> | INTERPRO              | <a href="#">Pyridoxal phosphate-dependent transferase, major region, subdomain 1</a> | RT |  | 7     | 1.5E-1  | 9.6E-1    |
| <input type="checkbox"/> | INTERPRO              | <a href="#">Aminotransferase, class I/classII</a>                                    | RT |  | 4     | 1.7E-1  | 9.7E-1    |
| <input type="checkbox"/> | INTERPRO              | <a href="#">Pyridoxal phosphate-dependent transferase, major region, subdomain 2</a> | RT |  | 5     | 4.3E-1  | 1.0E0     |
|                          | Annotation Cluster 82 | Enrichment Score: 1.26                                                               | G  |  | Count | P_Value | Benjamini |
| <input type="checkbox"/> | GOTERM_MF_DIRECT      | <a href="#">lipopolysaccharide binding</a>                                           | RT |  | 7     | 2.8E-3  | 6.5E-2    |
| <input type="checkbox"/> | GOTERM_CC_DIRECT      | <a href="#">lipopolysaccharide receptor complex</a>                                  | RT |  | 3     | 9.0E-2  | 4.4E-1    |
| <input type="checkbox"/> | GOTERM_BP_DIRECT      | <a href="#">positive regulation of interferon-gamma production</a>                   | RT |  | 4     | 6.7E-1  | 1.0E0     |
|                          | Annotation Cluster 83 | Enrichment Score: 1.26                                                               | G  |  | Count | P_Value | Benjamini |
| <input type="checkbox"/> | GOTERM_CC_DIRECT      | <a href="#">vacuolar membrane</a>                                                    | RT |  | 5     | 1.2E-2  | 1.0E-1    |
| <input type="checkbox"/> | INTERPRO              | <a href="#">NSF attachment protein</a>                                               | RT |  | 3     | 1.9E-2  | 4.2E-1    |
| <input type="checkbox"/> | GOTERM_MF_DIRECT      | <a href="#">soluble NSF attachment protein activity</a>                              | RT |  | 3     | 2.3E-2  | 3.3E-1    |

|                          | Annotation Cluster | Enrichment Score |           |  | Count | P_Value | Benjamini |
|--------------------------|--------------------|------------------|-----------|--|-------|---------|-----------|
| <input type="checkbox"/> | GOTERM_BP_DIRECT   | 57.69            | <b>G</b>  |  | 6     | 3.6E-2  | 7.2E-1    |
| <input type="checkbox"/> | GOTERM_CC_DIRECT   |                  | <b>RT</b> |  | 3     | 4.0E-2  | 2.7E-1    |
| <input type="checkbox"/> | GOTERM_CC_DIRECT   |                  | <b>RT</b> |  | 6     | 3.9E-1  | 8.7E-1    |
| <input type="checkbox"/> | GOTERM_MF_DIRECT   |                  | <b>RT</b> |  | 5     | 5.7E-1  | 1.0E0     |
| <input type="checkbox"/> | INTERPRO           | 1.25             | <b>G</b>  |  | 5     | 2.8E-2  | 5.3E-1    |
| <input type="checkbox"/> | INTERPRO           |                  | <b>RT</b> |  | 5     | 2.8E-2  | 5.3E-1    |
| <input type="checkbox"/> | SMART              |                  | <b>RT</b> |  | 3     | 7.8E-2  | 6.3E-1    |
| <input type="checkbox"/> | INTERPRO           |                  | <b>RT</b> |  | 3     | 1.6E-1  | 9.6E-1    |
| <input type="checkbox"/> | UP_KEYWORDS        | 1.24             | <b>G</b>  |  | 7     | 9.6E-4  | 3.4E-3    |
| <input type="checkbox"/> | GOTERM_MF_DIRECT   |                  | <b>RT</b> |  | 7     | 1.4E-2  | 2.3E-1    |
| <input type="checkbox"/> | INTERPRO           |                  | <b>RT</b> |  | 4     | 1.2E-1  | 9.2E-1    |
| <input type="checkbox"/> | INTERPRO           |                  | <b>RT</b> |  | 3     | 1.3E-1  | 9.4E-1    |
| <input type="checkbox"/> | UP_SEQ_FEATURE     |                  | <b>RT</b> |  | 3     | 3.8E-1  | 1.0E0     |
| <input type="checkbox"/> | UP_SEQ_FEATURE     |                  | <b>RT</b> |  | 4     | 4.3E-1  | 1.0E0     |
| <input type="checkbox"/> | UP_KEYWORDS        | 1.23             | <b>G</b>  |  | 23    | 3.5E-3  | 1.1E-2    |
| <input type="checkbox"/> | UP_KEYWORDS        |                  | <b>RT</b> |  | 31    | 4.8E-3  | 1.5E-2    |
| <input type="checkbox"/> | GOTERM_BP_DIRECT   |                  | <b>RT</b> |  | 20    | 8.6E-2  | 9.1E-1    |
| <input type="checkbox"/> | GOTERM_BP_DIRECT   |                  | <b>RT</b> |  | 13    | 2.4E-1  | 9.9E-1    |
| <input type="checkbox"/> | UP_KEYWORDS        |                  | <b>RT</b> |  | 11    | 2.9E-1  | 5.2E-1    |
| <input type="checkbox"/> | GOTERM_CC_DIRECT   |                  | <b>RT</b> |  | 7     | 4.3E-1  | 8.9E-1    |
| <input type="checkbox"/> | GOTERM_BP_DIRECT   | 1.23             | <b>G</b>  |  | 6     | 8.5E-3  | 3.4E-1    |
| <input type="checkbox"/> | UP_KEYWORDS        |                  | <b>RT</b> |  | 4     | 3.9E-2  | 9.7E-2    |
| <input type="checkbox"/> | UP_KEYWORDS        |                  | <b>RT</b> |  | 4     | 5.0E-2  | 1.2E-1    |
| <input type="checkbox"/> | KEGG_PATHWAY       |                  | <b>RT</b> |  | 7     | 7.6E-1  | 9.1E-1    |
| <input type="checkbox"/> | INTERPRO           | 1.21             | <b>G</b>  |  | 4     | 3.1E-2  | 5.5E-1    |
| <input type="checkbox"/> | GOTERM_MF_DIRECT   |                  | <b>RT</b> |  | 4     | 4.1E-2  | 4.4E-1    |
| <input type="checkbox"/> | GOTERM_BP_DIRECT   |                  | <b>RT</b> |  | 3     | 4.4E-2  | 7.6E-1    |
| <input type="checkbox"/> | UP_SEQ_FEATURE     |                  | <b>RT</b> |  | 6     | 9.4E-2  | 1.0E0     |
| <input type="checkbox"/> | GOTERM_BP_DIRECT   |                  | <b>RT</b> |  | 3     | 9.7E-2  | 9.2E-1    |
| <input type="checkbox"/> | UP_SEQ_FEATURE     |                  | <b>RT</b> |  | 5     | 1.1E-1  | 1.0E0     |
| <input type="checkbox"/> | GOTERM_BP_DIRECT   | 1.19             | <b>G</b>  |  | 3     | 4.4E-2  | 7.6E-1    |
| <input type="checkbox"/> | GOTERM_CC_DIRECT   |                  | <b>RT</b> |  | 3     | 6.4E-2  | 3.6E-1    |
| <input type="checkbox"/> | GOTERM_MF_DIRECT   |                  | <b>RT</b> |  | 3     | 9.6E-2  | 6.9E-1    |
| <input type="checkbox"/> | UP_KEYWORDS        | 1.19             | <b>G</b>  |  | 9     | 7.2E-3  | 2.2E-2    |
| <input type="checkbox"/> | UP_KEYWORDS        |                  | <b>RT</b> |  | 5     | 1.1E-2  | 3.3E-2    |
| <input type="checkbox"/> | UP_KEYWORDS        |                  | <b>RT</b> |  | 6     | 1.5E-1  | 3.1E-1    |
| <input type="checkbox"/> | GOTERM_CC_DIRECT   |                  | <b>RT</b> |  | 6     | 2.5E-1  | 7.3E-1    |
| <input type="checkbox"/> | GOTERM_BP_DIRECT   |                  | <b>RT</b> |  | 4     | 3.7E-1  | 1.0E0     |
| <input type="checkbox"/> | INTERPRO           | 1.17             | <b>G</b>  |  | 11    | 4.1E-4  | 2.8E-2    |
| <input type="checkbox"/> | INTERPRO           |                  | <b>RT</b> |  | 8     | 1.7E-3  | 8.4E-2    |
| <input type="checkbox"/> | GOTERM_MF_DIRECT   |                  | <b>RT</b> |  | 9     | 2.0E-3  | 5.2E-2    |
| <input type="checkbox"/> | INTERPRO           |                  | <b>RT</b> |  | 11    | 5.9E-3  | 2.1E-1    |
| <input type="checkbox"/> | UP_SEQ_FEATURE     |                  | <b>RT</b> |  | 10    | 4.2E-2  | 9.7E-1    |
| <input type="checkbox"/> | GOTERM_BP_DIRECT   |                  | <b>RT</b> |  | 4     | 7.1E-2  | 8.7E-1    |
| <input type="checkbox"/> | GOTERM_BP_DIRECT   |                  | <b>RT</b> |  | 6     | 1.0E-1  | 9.3E-1    |

| Annotation Cluster 1     |                  | Enrichment Score: 57.69                                                                  | <b>G</b>  |     | Count | P_Value | Benjamini |
|--------------------------|------------------|------------------------------------------------------------------------------------------|-----------|---------------------------------------------------------------------------------------|-------|---------|-----------|
| <input type="checkbox"/> | GOTERM_BP_DIRECT | <a href="#">protein K48-linked ubiquitination</a>                                        | <b>RT</b> |      | 8     | 1.1E-1  | 9.4E-1    |
| <input type="checkbox"/> | GOTERM_BP_DIRECT | <a href="#">protein K11-linked ubiquitination</a>                                        | <b>RT</b> |      | 4     | 3.5E-1  | 1.0E0     |
| <input type="checkbox"/> | KEGG_PATHWAY     | <a href="#">Ubiquitin mediated proteolysis</a>                                           | <b>RT</b> |      | 13    | 7.4E-1  | 9.1E-1    |
| <input type="checkbox"/> | GOTERM_MF_DIRECT | <a href="#">ubiquitin-protein transferase activity</a>                                   | <b>RT</b> |      | 15    | 8.1E-1  | 1.0E0     |
| <input type="checkbox"/> | GOTERM_BP_DIRECT | <a href="#">protein polyubiquitination</a>                                               | <b>RT</b> |      | 6     | 8.5E-1  | 1.0E0     |
| <input type="checkbox"/> | GOTERM_MF_DIRECT | <a href="#">ubiquitin protein ligase activity</a>                                        | <b>RT</b> |      | 11    | 8.6E-1  | 1.0E0     |
| <input type="checkbox"/> | GOTERM_BP_DIRECT | <a href="#">protein autoubiquitination</a>                                               | <b>RT</b> |      | 3     | 9.4E-1  | 1.0E0     |
| Annotation Cluster 92    |                  | Enrichment Score: 1.16                                                                   | <b>G</b>  |    | Count | P_Value | Benjamini |
| <input type="checkbox"/> | GOTERM_MF_DIRECT | <a href="#">chaperone binding</a>                                                        | <b>RT</b> |      | 9     | 1.2E-3  | 3.3E-2    |
| <input type="checkbox"/> | SMART            | <a href="#">DnaJ</a>                                                                     | <b>RT</b> |      | 8     | 4.8E-2  | 4.9E-1    |
| <input type="checkbox"/> | INTERPRO         | <a href="#">DnaJ domain</a>                                                              | <b>RT</b> |      | 8     | 1.1E-1  | 9.2E-1    |
| <input type="checkbox"/> | INTERPRO         | <a href="#">DnaJ domain, conserved site</a>                                              | <b>RT</b> |      | 5     | 1.5E-1  | 9.6E-1    |
| <input type="checkbox"/> | INTERPRO         | <a href="#">HSP40/DnaJ peptide-binding</a>                                               | <b>RT</b> |      | 3     | 1.6E-1  | 9.6E-1    |
| <input type="checkbox"/> | INTERPRO         | <a href="#">Chaperone DnaJ, C-terminal</a>                                               | <b>RT</b> |      | 3     | 1.6E-1  | 9.6E-1    |
| <input type="checkbox"/> | UP_SEQ_FEATURE   | domain:J                                                                                 | <b>RT</b> |      | 8     | 3.2E-1  | 1.0E0     |
| Annotation Cluster 93    |                  | Enrichment Score: 1.14                                                                   | <b>G</b>  |    | Count | P_Value | Benjamini |
| <input type="checkbox"/> | UP_KEYWORDS      | <a href="#">Signalosome</a>                                                              | <b>RT</b> |      | 3     | 3.4E-2  | 8.6E-2    |
| <input type="checkbox"/> | GOTERM_CC_DIRECT | <a href="#">COP9 signalosome</a>                                                         | <b>RT</b> |      | 7     | 4.8E-2  | 3.0E-1    |
| <input type="checkbox"/> | GOTERM_BP_DIRECT | <a href="#">cullin deneddylation</a>                                                     | <b>RT</b> |      | 3     | 2.3E-1  | 9.9E-1    |
| Annotation Cluster 94    |                  | Enrichment Score: 1.14                                                                   | <b>G</b>  |    | Count | P_Value | Benjamini |
| <input type="checkbox"/> | INTERPRO         | <a href="#">Ubiquitin</a>                                                                | <b>RT</b> |      | 12    | 5.3E-3  | 1.9E-1    |
| <input type="checkbox"/> | INTERPRO         | <a href="#">Ubiquitin conserved site</a>                                                 | <b>RT</b> |      | 5     | 8.8E-3  | 2.7E-1    |
| <input type="checkbox"/> | INTERPRO         | <a href="#">Ubiquitin subgroup</a>                                                       | <b>RT</b> |      | 5     | 1.7E-2  | 3.9E-1    |
| <input type="checkbox"/> | SMART            | <a href="#">UBQ</a>                                                                      | <b>RT</b> |      | 8     | 1.8E-2  | 2.4E-1    |
| <input type="checkbox"/> | UP_SEQ_FEATURE   | chain:60S ribosomal protein L40                                                          | <b>RT</b> |      | 3     | 1.2E-1  | 1.0E0     |
| <input type="checkbox"/> | UP_SEQ_FEATURE   | chain:Ubiquitin                                                                          | <b>RT</b> |     | 4     | 1.7E-1  | 1.0E0     |
| <input type="checkbox"/> | UP_SEQ_FEATURE   | site:Essential for function                                                              | <b>RT</b> |    | 4     | 1.7E-1  | 1.0E0     |
| <input type="checkbox"/> | UP_SEQ_FEATURE   | binding site:Activating enzyme                                                           | <b>RT</b> |    | 4     | 2.4E-1  | 1.0E0     |
| <input type="checkbox"/> | UP_SEQ_FEATURE   | cross-link:Glycyl lysine isopeptide (Gly-Lys) (interchain with K-? in acceptor proteins) | <b>RT</b> |    | 5     | 5.1E-1  | 1.0E0     |
| <input type="checkbox"/> | UP_SEQ_FEATURE   | domain:Ubiquitin-like                                                                    | <b>RT</b> |    | 6     | 6.1E-1  | 1.0E0     |
| Annotation Cluster 95    |                  | Enrichment Score: 1.13                                                                   | <b>G</b>  |  | Count | P_Value | Benjamini |
| <input type="checkbox"/> | UP_SEQ_FEATURE   | site:Transition state stabilizer                                                         | <b>RT</b> |    | 7     | 4.5E-3  | 4.2E-1    |
| <input type="checkbox"/> | KEGG_PATHWAY     | <a href="#">beta-Alanine metabolism</a>                                                  | <b>RT</b> |    | 9     | 1.9E-2  | 1.1E-1    |
| <input type="checkbox"/> | GOTERM_MF_DIRECT | <a href="#">aldehyde dehydrogenase (NAD) activity</a>                                    | <b>RT</b> |    | 5     | 3.2E-2  | 3.8E-1    |
| <input type="checkbox"/> | INTERPRO         | <a href="#">Aldehyde dehydrogenase domain</a>                                            | <b>RT</b> |    | 5     | 5.2E-2  | 7.1E-1    |
| <input type="checkbox"/> | INTERPRO         | <a href="#">Aldehyde dehydrogenase, N-terminal</a>                                       | <b>RT</b> |    | 5     | 5.2E-2  | 7.1E-1    |
| <input type="checkbox"/> | INTERPRO         | <a href="#">Aldehyde dehydrogenase, C-terminal</a>                                       | <b>RT</b> |    | 5     | 5.2E-2  | 7.1E-1    |
| <input type="checkbox"/> | INTERPRO         | <a href="#">Aldehyde/histidinol dehydrogenase</a>                                        | <b>RT</b> |    | 5     | 5.2E-2  | 7.1E-1    |
| <input type="checkbox"/> | INTERPRO         | <a href="#">Aldehyde dehydrogenase, conserved site</a>                                   | <b>RT</b> |    | 4     | 8.2E-2  | 8.5E-1    |
| <input type="checkbox"/> | KEGG_PATHWAY     | <a href="#">Tryptophan metabolism</a>                                                    | <b>RT</b> |    | 9     | 9.1E-2  | 3.4E-1    |
| <input type="checkbox"/> | KEGG_PATHWAY     | <a href="#">Lysine degradation</a>                                                       | <b>RT</b> |    | 9     | 1.8E-1  | 4.9E-1    |
| <input type="checkbox"/> | KEGG_PATHWAY     | <a href="#">Histidine metabolism</a>                                                     | <b>RT</b> |    | 5     | 1.8E-1  | 4.9E-1    |
| <input type="checkbox"/> | KEGG_PATHWAY     | <a href="#">Glycerolipid metabolism</a>                                                  | <b>RT</b> |    | 7     | 6.3E-1  | 8.7E-1    |
| <input type="checkbox"/> | KEGG_PATHWAY     | <a href="#">Ascorbate and aldarate metabolism</a>                                        | <b>RT</b> |    | 3     | 6.5E-1  | 8.8E-1    |
| Annotation Cluster 96    |                  | Enrichment Score: 1.13                                                                   | <b>G</b>  |  | Count | P_Value | Benjamini |
| <input type="checkbox"/> | INTERPRO         | <a href="#">Profilin, chordates</a>                                                      | <b>RT</b> |    | 3     | 1.9E-2  | 4.2E-1    |
| <input type="checkbox"/> | SMART            | <a href="#">PROF</a>                                                                     | <b>RT</b> |    | 3     | 2.6E-2  | 3.1E-1    |
| <input type="checkbox"/> | INTERPRO         | <a href="#">Profilin</a>                                                                 | <b>RT</b> |    | 3     | 3.5E-2  | 5.9E-1    |
| <input type="checkbox"/> | GOTERM_BP_DIRECT | <a href="#">positive regulation of actin filament bundle assembly</a>                    | <b>RT</b> |    | 4     | 4.1E-2  | 7.5E-1    |
| <input type="checkbox"/> | GOTERM_BP_DIRECT | <a href="#">regulation of actin filament polymerization</a>                              | <b>RT</b> |    | 3     | 3.0E-1  | 1.0E0     |
| <input type="checkbox"/> | GOTERM_BP_DIRECT | <a href="#">actin cytoskeleton organization</a>                                          | <b>RT</b> |    | 6     | 8.6E-1  | 1.0E0     |
| Annotation Cluster 97    |                  | Enrichment Score: 1.09                                                                   | <b>G</b>  |  | Count | P_Value | Benjamini |
| <input type="checkbox"/> | INTERPRO         | <a href="#">Glutathione S-transferase, C-terminal-like</a>                               | <b>RT</b> |    | 9     | 1.1E-2  | 3.3E-1    |



| Annotation Cluster 1     |                  | Enrichment Score: 57.69                                                            | G  |     | Count | P_Value | Benjamini |
|--------------------------|------------------|------------------------------------------------------------------------------------|----|---------------------------------------------------------------------------------------|-------|---------|-----------|
| <input type="checkbox"/> | GOTERM_BP_DIRECT | <a href="#">glutathione metabolic process</a>                                      | RT |      | 8     | 1.3E-2  | 4.4E-1    |
| <input type="checkbox"/> | INTERPRO         | <a href="#">Glutathione S-transferase, N-terminal</a>                              | RT |      | 7     | 2.2E-2  | 4.6E-1    |
| <input type="checkbox"/> | UP_SEQ_FEATURE   | domain:GST C-terminal                                                              | RT |      | 8     | 5.3E-2  | 9.8E-1    |
| <input type="checkbox"/> | GOTERM_MF_DIRECT | <a href="#">glutathione transferase activity</a>                                   | RT |      | 7     | 5.6E-2  | 5.2E-1    |
| <input type="checkbox"/> | UP_SEQ_FEATURE   | domain:GST N-terminal                                                              | RT |      | 5     | 7.1E-2  | 9.9E-1    |
| <input type="checkbox"/> | INTERPRO         | <a href="#">Glutathione S-transferase, C-terminal</a>                              | RT |      | 5     | 9.7E-2  | 8.9E-1    |
| <input type="checkbox"/> | KEGG_PATHWAY     | <a href="#">Drug metabolism - cytochrome P450</a>                                  | RT |      | 7     | 5.5E-1  | 8.4E-1    |
| <input type="checkbox"/> | KEGG_PATHWAY     | <a href="#">Metabolism of xenobiotics by cytochrome P450</a>                       | RT |      | 7     | 5.7E-1  | 8.4E-1    |
| <input type="checkbox"/> | KEGG_PATHWAY     | <a href="#">Chemical carcinogenesis</a>                                            | RT |      | 8     | 5.8E-1  | 8.4E-1    |
| Annotation Cluster 98    |                  | Enrichment Score: 1.09                                                             | G  |    | Count | P_Value | Benjamini |
| <input type="checkbox"/> | INTERPRO         | <a href="#">Phosphoglycerate mutase 1</a>                                          | RT |      | 3     | 1.9E-2  | 4.2E-1    |
| <input type="checkbox"/> | GOTERM_MF_DIRECT | <a href="#">2,3-bisphosphoglycerate-dependent phosphoglycerate mutase activity</a> | RT |      | 3     | 2.3E-2  | 3.3E-1    |
| <input type="checkbox"/> | GOTERM_MF_DIRECT | <a href="#">bisphosphoglycerate mutase activity</a>                                | RT |      | 3     | 2.3E-2  | 3.3E-1    |
| <input type="checkbox"/> | GOTERM_MF_DIRECT | <a href="#">bisphosphoglycerate 2-phosphatase activity</a>                         | RT |      | 3     | 4.3E-2  | 4.5E-1    |
| <input type="checkbox"/> | GOTERM_BP_DIRECT | <a href="#">regulation of pentose-phosphate shunt</a>                              | RT |      | 3     | 4.4E-2  | 7.6E-1    |
| <input type="checkbox"/> | SMART            | <a href="#">SM00855</a>                                                            | RT |      | 3     | 1.2E-1  | 7.2E-1    |
| <input type="checkbox"/> | INTERPRO         | <a href="#">Phosphoglycerate/bisphosphoglycerate mutase, active site</a>           | RT |      | 3     | 1.3E-1  | 9.4E-1    |
| <input type="checkbox"/> | INTERPRO         | <a href="#">Histidine phosphatase superfamily, clade-1</a>                         | RT |      | 3     | 2.2E-1  | 9.9E-1    |
| <input type="checkbox"/> | UP_SEQ_FEATURE   | active site:Tele-phosphohistidine intermediate                                     | RT |      | 5     | 3.5E-1  | 1.0E0     |
| <input type="checkbox"/> | UP_SEQ_FEATURE   | site:Interaction with carboxyl group of phosphoglycerates                          | RT |      | 3     | 5.4E-1  | 1.0E0     |
| Annotation Cluster 99    |                  | Enrichment Score: 1.07                                                             | G  |    | Count | P_Value | Benjamini |
| <input type="checkbox"/> | INTERPRO         | <a href="#">EF-Hand 1, calcium-binding site</a>                                    | RT |      | 25    | 1.5E-3  | 7.6E-2    |
| <input type="checkbox"/> | SMART            | <a href="#">EFh</a>                                                                | RT |      | 19    | 4.4E-3  | 9.1E-2    |
| <input type="checkbox"/> | INTERPRO         | <a href="#">EF-hand domain</a>                                                     | RT |      | 28    | 5.0E-3  | 2.0E-1    |
| <input type="checkbox"/> | INTERPRO         | <a href="#">EF-hand-like domain</a>                                                | RT |    | 31    | 1.4E-2  | 3.6E-1    |
| <input type="checkbox"/> | GOTERM_MF_DIRECT | <a href="#">calcium ion binding</a>                                                | RT |    | 63    | 7.6E-2  | 6.2E-1    |
| <input type="checkbox"/> | UP_SEQ_FEATURE   | domain:EF-hand 1                                                                   | RT |    | 24    | 1.2E-1  | 1.0E0     |
| <input type="checkbox"/> | UP_SEQ_FEATURE   | domain:EF-hand 2                                                                   | RT |    | 24    | 1.2E-1  | 1.0E0     |
| <input type="checkbox"/> | UP_SEQ_FEATURE   | calcium-binding region:1                                                           | RT |    | 18    | 1.6E-1  | 1.0E0     |
| <input type="checkbox"/> | UP_SEQ_FEATURE   | domain:EF-hand 5                                                                   | RT |    | 4     | 1.7E-1  | 1.0E0     |
| <input type="checkbox"/> | UP_SEQ_FEATURE   | calcium-binding region:2                                                           | RT |    | 15    | 2.8E-1  | 1.0E0     |
| <input type="checkbox"/> | UP_SEQ_FEATURE   | calcium-binding region:5                                                           | RT |    | 3     | 2.9E-1  | 1.0E0     |
| <input type="checkbox"/> | UP_SEQ_FEATURE   | calcium-binding region:4                                                           | RT |    | 5     | 3.0E-1  | 1.0E0     |
| <input type="checkbox"/> | UP_SEQ_FEATURE   | domain:EF-hand 3                                                                   | RT |    | 11    | 5.7E-1  | 1.0E0     |
| <input type="checkbox"/> | UP_SEQ_FEATURE   | domain:EF-hand 4                                                                   | RT |    | 8     | 7.1E-1  | 1.0E0     |
| <input type="checkbox"/> | UP_SEQ_FEATURE   | calcium-binding region:3                                                           | RT |    | 6     | 7.5E-1  | 1.0E0     |
| Annotation Cluster 100   |                  | Enrichment Score: 1.06                                                             | G  |  | Count | P_Value | Benjamini |
| <input type="checkbox"/> | GOTERM_BP_DIRECT | <a href="#">peptide catabolic process</a>                                          | RT |    | 7     | 5.3E-3  | 2.5E-1    |
| <input type="checkbox"/> | GOTERM_MF_DIRECT | <a href="#">metalloaminopeptidase activity</a>                                     | RT |    | 5     | 5.0E-2  | 4.9E-1    |
| <input type="checkbox"/> | GOTERM_MF_DIRECT | <a href="#">peptide binding</a>                                                    | RT |    | 7     | 8.2E-2  | 6.4E-1    |
| <input type="checkbox"/> | INTERPRO         | <a href="#">Peptidase M1, alanine aminopeptidase/leukotriene A4 hydrolase</a>      | RT |    | 3     | 1.9E-1  | 9.8E-1    |
| <input type="checkbox"/> | INTERPRO         | <a href="#">Peptidase M1, membrane alanine aminopeptidase, N-terminal</a>          | RT |    | 3     | 2.2E-1  | 9.9E-1    |
| <input type="checkbox"/> | UP_SEQ_FEATURE   | metal ion-binding site:Zinc; catalytic                                             | RT |    | 9     | 4.5E-1  | 1.0E0     |
| Annotation Cluster 101   |                  | Enrichment Score: 1.05                                                             | G  |  | Count | P_Value | Benjamini |
| <input type="checkbox"/> | GOTERM_MF_DIRECT | <a href="#">lipopolysaccharide binding</a>                                         | RT |    | 7     | 2.8E-3  | 6.5E-2    |
| <input type="checkbox"/> | GOTERM_BP_DIRECT | <a href="#">cellular response to lipoteichoic acid</a>                             | RT |    | 3     | 9.7E-2  | 9.2E-1    |
| <input type="checkbox"/> | GOTERM_BP_DIRECT | <a href="#">lipopolysaccharide-mediated signaling pathway</a>                      | RT |    | 5     | 2.5E-1  | 9.9E-1    |
| <input type="checkbox"/> | KEGG_PATHWAY     | <a href="#">NF-kappa B signaling pathway</a>                                       | RT |    | 7     | 9.1E-1  | 9.7E-1    |
| Annotation Cluster 102   |                  | Enrichment Score: 1.04                                                             | G  |  | Count | P_Value | Benjamini |
| <input type="checkbox"/> | INTERPRO         | <a href="#">Peptidase S8/S53 domain</a>                                            | RT |    | 4     | 3.1E-2  | 5.5E-1    |
| <input type="checkbox"/> | INTERPRO         | <a href="#">Peptidase S8, subtilisin, Ser-active site</a>                          | RT |    | 3     | 1.3E-1  | 9.4E-1    |

|                          | Annotation Cluster     | Enrichment Score                                                                |    |  | Count | P_Value | Benjamini |
|--------------------------|------------------------|---------------------------------------------------------------------------------|----|--|-------|---------|-----------|
| <input type="checkbox"/> | INTERPRO               | Peptidase S8, subtilisin-related                                                | RT |  | 3     | 1.3E-1  | 9.4E-1    |
| <input type="checkbox"/> | INTERPRO               | Peptidase S8, subtilisin, His-active site                                       | RT |  | 3     | 1.3E-1  | 9.4E-1    |
|                          | Annotation Cluster 103 | Enrichment Score: 1.04                                                          | G  |  | Count | P_Value | Benjamini |
| <input type="checkbox"/> | INTERPRO               | Insulin family                                                                  | RT |  | 3     | 5.5E-2  | 7.3E-1    |
| <input type="checkbox"/> | SMART                  | IIGF                                                                            | RT |  | 3     | 7.8E-2  | 6.3E-1    |
| <input type="checkbox"/> | INTERPRO               | Insulin-like                                                                    | RT |  | 3     | 1.0E-1  | 9.0E-1    |
| <input type="checkbox"/> | INTERPRO               | Insulin, conserved site                                                         | RT |  | 3     | 1.0E-1  | 9.0E-1    |
| <input type="checkbox"/> | GOTERM_MF_DIRECT       | hormone activity                                                                | RT |  | 9     | 1.4E-1  | 8.1E-1    |
|                          | Annotation Cluster 104 | Enrichment Score: 1.03                                                          | G  |  | Count | P_Value | Benjamini |
| <input type="checkbox"/> | UP_KEYWORDS            | Sushi                                                                           | RT |  | 8     | 2.5E-3  | 8.7E-3    |
| <input type="checkbox"/> | UP_SEQ_FEATURE         | domain:Sushi 1                                                                  | RT |  | 8     | 9.3E-2  | 1.0E0     |
| <input type="checkbox"/> | UP_SEQ_FEATURE         | domain:Sushi 2                                                                  | RT |  | 8     | 1.2E-1  | 1.0E0     |
| <input type="checkbox"/> | INTERPRO               | Sushi/SCR/CCP                                                                   | RT |  | 8     | 1.2E-1  | 9.3E-1    |
| <input type="checkbox"/> | SMART                  | CCP                                                                             | RT |  | 7     | 1.2E-1  | 7.2E-1    |
| <input type="checkbox"/> | UP_SEQ_FEATURE         | domain:Sushi 3                                                                  | RT |  | 5     | 2.5E-1  | 1.0E0     |
| <input type="checkbox"/> | UP_SEQ_FEATURE         | domain:Sushi 4                                                                  | RT |  | 3     | 6.1E-1  | 1.0E0     |
|                          | Annotation Cluster 105 | Enrichment Score: 1.03                                                          | G  |  | Count | P_Value | Benjamini |
| <input type="checkbox"/> | INTERPRO               | Somatomedin B domain                                                            | RT |  | 4     | 4.1E-2  | 6.5E-1    |
| <input type="checkbox"/> | SMART                  | SO                                                                              | RT |  | 3     | 7.8E-2  | 6.3E-1    |
| <input type="checkbox"/> | GOTERM_MF_DIRECT       | polysaccharide binding                                                          | RT |  | 4     | 8.8E-2  | 6.6E-1    |
| <input type="checkbox"/> | GOTERM_MF_DIRECT       | scavenger receptor activity                                                     | RT |  | 7     | 2.8E-1  | 9.5E-1    |
|                          | Annotation Cluster 106 | Enrichment Score: 1.02                                                          | G  |  | Count | P_Value | Benjamini |
| <input type="checkbox"/> | GOTERM_BP_DIRECT       | nucleoside diphosphate phosphorylation                                          | RT |  | 5     | 1.9E-3  | 1.2E-1    |
| <input type="checkbox"/> | GOTERM_BP_DIRECT       | nucleoside triphosphate biosynthetic process                                    | RT |  | 5     | 1.3E-2  | 4.4E-1    |
| <input type="checkbox"/> | GOTERM_MF_DIRECT       | nucleoside diphosphate kinase activity                                          | RT |  | 5     | 6.1E-2  | 5.5E-1    |
| <input type="checkbox"/> | UP_SEQ_FEATURE         | active site:Pros-phosphohistidine intermediate                                  | RT |  | 3     | 1.2E-1  | 1.0E0     |
| <input type="checkbox"/> | SMART                  | NDK                                                                             | RT |  | 3     | 1.2E-1  | 7.2E-1    |
| <input type="checkbox"/> | INTERPRO               | Nucleoside diphosphate kinase                                                   | RT |  | 3     | 1.6E-1  | 9.6E-1    |
| <input type="checkbox"/> | GOTERM_BP_DIRECT       | CTP biosynthetic process                                                        | RT |  | 3     | 1.9E-1  | 9.9E-1    |
| <input type="checkbox"/> | GOTERM_BP_DIRECT       | UTP biosynthetic process                                                        | RT |  | 3     | 1.9E-1  | 9.9E-1    |
| <input type="checkbox"/> | UP_KEYWORDS            | Nucleotide metabolism                                                           | RT |  | 3     | 2.1E-1  | 4.1E-1    |
| <input type="checkbox"/> | GOTERM_BP_DIRECT       | GTP biosynthetic process                                                        | RT |  | 3     | 2.6E-1  | 9.9E-1    |
| <input type="checkbox"/> | KEGG_PATHWAY           | Pyrimidine metabolism                                                           | RT |  | 8     | 8.8E-1  | 9.7E-1    |
|                          | Annotation Cluster 107 | Enrichment Score: 1                                                             | G  |  | Count | P_Value | Benjamini |
| <input type="checkbox"/> | GOTERM_CC_DIRECT       | nucleosome                                                                      | RT |  | 14    | 1.5E-2  | 1.3E-1    |
| <input type="checkbox"/> | INTERPRO               | Histone core                                                                    | RT |  | 14    | 1.5E-2  | 3.7E-1    |
| <input type="checkbox"/> | SMART                  | H2A                                                                             | RT |  | 5     | 9.9E-2  | 6.8E-1    |
| <input type="checkbox"/> | INTERPRO               | Histone H2A                                                                     | RT |  | 5     | 1.5E-1  | 9.6E-1    |
| <input type="checkbox"/> | GOTERM_BP_DIRECT       | chromatin silencing                                                             | RT |  | 5     | 3.1E-1  | 1.0E0     |
| <input type="checkbox"/> | GOTERM_CC_DIRECT       | nuclear chromatin                                                               | RT |  | 8     | 9.8E-1  | 1.0E0     |
|                          | Annotation Cluster 108 | Enrichment Score: 0.99                                                          | G  |  | Count | P_Value | Benjamini |
| <input type="checkbox"/> | GOTERM_BP_DIRECT       | terminal web assembly                                                           | RT |  | 3     | 2.3E-2  | 5.9E-1    |
| <input type="checkbox"/> | GOTERM_BP_DIRECT       | intestinal D-glucose absorption                                                 | RT |  | 3     | 4.4E-2  | 7.6E-1    |
| <input type="checkbox"/> | GOTERM_BP_DIRECT       | regulation of microvillus length                                                | RT |  | 3     | 9.7E-2  | 9.2E-1    |
| <input type="checkbox"/> | GOTERM_BP_DIRECT       | positive regulation of establishment of protein localization to plasma membrane | RT |  | 5     | 2.1E-1  | 9.9E-1    |
| <input type="checkbox"/> | GOTERM_BP_DIRECT       | positive regulation of multicellular organism growth                            | RT |  | 4     | 5.4E-1  | 1.0E0     |
|                          | Annotation Cluster 109 | Enrichment Score: 0.97                                                          | G  |  | Count | P_Value | Benjamini |
| <input type="checkbox"/> | INTERPRO               | Alkaline-phosphatase-like, core domain                                          | RT |  | 7     | 3.0E-2  | 5.6E-1    |
| <input type="checkbox"/> | INTERPRO               | Alkaline phosphatase-like, alpha/beta/alpha                                     | RT |  | 7     | 3.0E-2  | 5.6E-1    |
| <input type="checkbox"/> | UP_SEQ_FEATURE         | metal ion-binding site:Calcium                                                  | RT |  | 8     | 9.3E-2  | 1.0E0     |
| <input type="checkbox"/> | INTERPRO               | Ectonucleotide pyrophosphatase/phosphodiesterase family                         | RT |  | 3     | 1.0E-1  | 9.0E-1    |
| <input type="checkbox"/> | UP_SEQ_FEATURE         | metal ion-binding site:Calcium; via 3-oxoalanine                                | RT |  | 3     | 1.2E-1  | 1.0E0     |

|                          | Annotation Cluster     | Enrichment Score                                                                          |          |  | Count | P_Value | Benjamini |
|--------------------------|------------------------|-------------------------------------------------------------------------------------------|----------|--|-------|---------|-----------|
| <input type="checkbox"/> | COG_ONTOLOGY           | 57.69                                                                                     | <b>G</b> |  | 4     | 2.1E-1  | 6.5E-1    |
| <input type="checkbox"/> | INTERPRO               | <a href="#">Inorganic ion transport and metabolism</a>                                    | RT       |  | 4     | 2.1E-1  | 6.5E-1    |
| <input type="checkbox"/> | INTERPRO               | <a href="#">Type I phosphodiesterase/nucleotide pyrophosphatase/phosphate transferase</a> | RT       |  | 3     | 2.2E-1  | 9.9E-1    |
| <input type="checkbox"/> | INTERPRO               | <a href="#">Sulfatase</a>                                                                 | RT       |  | 3     | 3.4E-1  | 1.0E0     |
| <input type="checkbox"/> | Annotation Cluster 110 | 0.97                                                                                      | <b>G</b> |  | Count | P_Value | Benjamini |
| <input type="checkbox"/> | INTERPRO               | <a href="#">Nitrophenylphosphatase-like domain</a>                                        | RT       |  | 3     | 5.5E-2  | 7.3E-1    |
| <input type="checkbox"/> | INTERPRO               | <a href="#">HAD-superfamily hydrolase, subfamily IIA</a>                                  | RT       |  | 3     | 7.9E-2  | 8.4E-1    |
| <input type="checkbox"/> | INTERPRO               | <a href="#">HAD-like domain</a>                                                           | RT       |  | 9     | 2.8E-1  | 1.0E0     |
| <input type="checkbox"/> | Annotation Cluster 111 | 0.96                                                                                      | <b>G</b> |  | Count | P_Value | Benjamini |
| <input type="checkbox"/> | GOTERM_BP_DIRECT       | <a href="#">mitochondrion organization</a>                                                | RT       |  | 8     | 3.5E-2  | 7.1E-1    |
| <input type="checkbox"/> | SMART                  | <a href="#">PHB</a>                                                                       | RT       |  | 3     | 1.7E-1  | 8.2E-1    |
| <input type="checkbox"/> | INTERPRO               | <a href="#">Band 7 protein</a>                                                            | RT       |  | 3     | 2.2E-1  | 9.9E-1    |
| <input type="checkbox"/> | Annotation Cluster 112 | 0.94                                                                                      | <b>G</b> |  | Count | P_Value | Benjamini |
| <input type="checkbox"/> | INTERPRO               | <a href="#">Phospholipase D/Transphosphatidylase</a>                                      | RT       |  | 3     | 1.0E-1  | 9.0E-1    |
| <input type="checkbox"/> | UP_SEQ_FEATURE         | domain:PLD phosphodiesterase 2                                                            | RT       |  | 3     | 1.2E-1  | 1.0E0     |
| <input type="checkbox"/> | UP_SEQ_FEATURE         | domain:PLD phosphodiesterase 1                                                            | RT       |  | 3     | 1.2E-1  | 1.0E0     |
| <input type="checkbox"/> | Annotation Cluster 113 | 0.91                                                                                      | <b>G</b> |  | Count | P_Value | Benjamini |
| <input type="checkbox"/> | UP_KEYWORDS            | <a href="#">Rotamase</a>                                                                  | RT       |  | 8     | 5.1E-3  | 1.6E-2    |
| <input type="checkbox"/> | GOTERM_BP_DIRECT       | <a href="#">protein peptidyl-prolyl isomerization</a>                                     | RT       |  | 8     | 5.6E-3  | 2.6E-1    |
| <input type="checkbox"/> | UP_KEYWORDS            | <a href="#">Cyclosporin</a>                                                               | RT       |  | 3     | 5.3E-2  | 1.3E-1    |
| <input type="checkbox"/> | GOTERM_MF_DIRECT       | <a href="#">peptidyl-prolyl cis-trans isomerase activity</a>                              | RT       |  | 8     | 7.3E-2  | 6.0E-1    |
| <input type="checkbox"/> | GOTERM_MF_DIRECT       | <a href="#">peptide binding</a>                                                           | RT       |  | 7     | 8.2E-2  | 6.4E-1    |
| <input type="checkbox"/> | INTERPRO               | <a href="#">Cyclophilin-type peptidyl-prolyl cis-trans isomerase</a>                      | RT       |  | 4     | 1.5E-1  | 9.6E-1    |
| <input type="checkbox"/> | INTERPRO               | <a href="#">Cyclophilin-like peptidyl-prolyl cis-trans isomerase domain</a>               | RT       |  | 4     | 1.7E-1  | 9.7E-1    |
| <input type="checkbox"/> | GOTERM_BP_DIRECT       | <a href="#">chaperone-mediated protein folding</a>                                        | RT       |  | 5     | 2.7E-1  | 1.0E0     |
| <input type="checkbox"/> | INTERPRO               | <a href="#">Cyclophilin-type peptidyl-prolyl cis-trans isomerase, conserved site</a>      | RT       |  | 3     | 3.4E-1  | 1.0E0     |
| <input type="checkbox"/> | INTERPRO               | <a href="#">Peptidyl-prolyl cis-trans isomerase, FKBP-type, domain</a>                    | RT       |  | 3     | 4.0E-1  | 1.0E0     |
| <input type="checkbox"/> | INTERPRO               | <a href="#">Peptidyl-prolyl cis-trans isomerase, FKBP-type</a>                            | RT       |  | 3     | 4.9E-1  | 1.0E0     |
| <input type="checkbox"/> | GOTERM_MF_DIRECT       | <a href="#">FK506 binding</a>                                                             | RT       |  | 3     | 5.5E-1  | 1.0E0     |
| <input type="checkbox"/> | UP_SEQ_FEATURE         | domain:PPIase cyclophilin-type                                                            | RT       |  | 4     | 7.0E-1  | 1.0E0     |
| <input type="checkbox"/> | Annotation Cluster 114 | 0.87                                                                                      | <b>G</b> |  | Count | P_Value | Benjamini |
| <input type="checkbox"/> | GOTERM_MF_DIRECT       | <a href="#">actin-dependent ATPase activity</a>                                           | RT       |  | 5     | 9.0E-3  | 1.6E-1    |
| <input type="checkbox"/> | GOTERM_MF_DIRECT       | <a href="#">calmodulin binding</a>                                                        | RT       |  | 12    | 3.7E-2  | 4.1E-1    |
| <input type="checkbox"/> | UP_KEYWORDS            | <a href="#">Motor protein</a>                                                             | RT       |  | 12    | 6.6E-2  | 1.5E-1    |
| <input type="checkbox"/> | UP_SEQ_FEATURE         | domain:IQ 1                                                                               | RT       |  | 5     | 7.1E-2  | 9.9E-1    |
| <input type="checkbox"/> | UP_SEQ_FEATURE         | domain:IQ 2                                                                               | RT       |  | 5     | 7.1E-2  | 9.9E-1    |
| <input type="checkbox"/> | UP_KEYWORDS            | <a href="#">Calmodulin-binding</a>                                                        | RT       |  | 8     | 9.6E-2  | 2.1E-1    |
| <input type="checkbox"/> | SMART                  | <a href="#">IQ</a>                                                                        | RT       |  | 7     | 1.0E-1  | 6.7E-1    |
| <input type="checkbox"/> | UP_SEQ_FEATURE         | domain:Myosin head-like                                                                   | RT       |  | 4     | 2.4E-1  | 1.0E0     |
| <input type="checkbox"/> | UP_KEYWORDS            | <a href="#">Myosin</a>                                                                    | RT       |  | 6     | 2.5E-1  | 4.6E-1    |
| <input type="checkbox"/> | INTERPRO               | <a href="#">IQ motif, EF-hand binding site</a>                                            | RT       |  | 8     | 4.6E-1  | 1.0E0     |
| <input type="checkbox"/> | SMART                  | <a href="#">MYSc</a>                                                                      | RT       |  | 4     | 4.7E-1  | 9.9E-1    |
| <input type="checkbox"/> | INTERPRO               | <a href="#">Myosin head, motor domain</a>                                                 | RT       |  | 4     | 5.8E-1  | 1.0E0     |
| <input type="checkbox"/> | GOTERM_CC_DIRECT       | <a href="#">myosin complex</a>                                                            | RT       |  | 4     | 7.1E-1  | 9.9E-1    |
| <input type="checkbox"/> | Annotation Cluster 115 | 0.86                                                                                      | <b>G</b> |  | Count | P_Value | Benjamini |
| <input type="checkbox"/> | UP_KEYWORDS            | <a href="#">Thioester bond</a>                                                            | RT       |  | 3     | 3.4E-2  | 8.6E-2    |
| <input type="checkbox"/> | INTERPRO               | <a href="#">Alpha-2-macroglobulin, conserved site</a>                                     | RT       |  | 3     | 1.0E-1  | 9.0E-1    |
| <input type="checkbox"/> | SMART                  | <a href="#">SM01361</a>                                                                   | RT       |  | 3     | 1.5E-1  | 7.7E-1    |
| <input type="checkbox"/> | INTERPRO               | <a href="#">Alpha-2-macroglobulin, thiol-ester bond-forming</a>                           | RT       |  | 3     | 1.6E-1  | 9.6E-1    |
| <input type="checkbox"/> | INTERPRO               | <a href="#">A-macroglobulin complement component</a>                                      | RT       |  | 3     | 1.9E-1  | 9.8E-1    |
| <input type="checkbox"/> | INTERPRO               | <a href="#">Alpha-macroglobulin, receptor-binding</a>                                     | RT       |  | 3     | 1.9E-1  | 9.8E-1    |
| <input type="checkbox"/> | INTERPRO               | <a href="#">Terpenoid cyclases/protein prenyltransferase alpha-alpha toroid</a>           | RT       |  | 3     | 3.1E-1  | 1.0E0     |

| Annotation Cluster 1     |                  | Enrichment Score: 57.69                                                          | <b>G</b>  |     | Count | P_Value | Benjamini |
|--------------------------|------------------|----------------------------------------------------------------------------------|-----------|---------------------------------------------------------------------------------------|-------|---------|-----------|
| Annotation Cluster 116   |                  | Enrichment Score: 0.85                                                           | <b>G</b>  |    | Count | P_Value | Benjamini |
| <input type="checkbox"/> | INTERPRO         | <a href="#">Heat shock protein Hsp90, conserved site</a>                         | <b>RT</b> |      | 3     | 3.5E-2  | 5.9E-1    |
| <input type="checkbox"/> | INTERPRO         | <a href="#">Heat shock protein Hsp90</a>                                         | <b>RT</b> |      | 3     | 5.5E-2  | 7.3E-1    |
| <input type="checkbox"/> | INTERPRO         | <a href="#">Heat shock protein Hsp90, N-terminal</a>                             | <b>RT</b> |      | 3     | 5.5E-2  | 7.3E-1    |
| <input type="checkbox"/> | INTERPRO         | <a href="#">Ribosomal protein S5 domain 2-type fold</a>                          | <b>RT</b> |      | 6     | 1.4E-1  | 9.4E-1    |
| <input type="checkbox"/> | SMART            | <a href="#">HATPase_c</a>                                                        | <b>RT</b> |      | 3     | 1.5E-1  | 7.7E-1    |
| <input type="checkbox"/> | PIR_SUPERFAMILY  | <a href="#">heat shock protein, HSP90/HTPG types</a>                             | <b>RT</b> |      | 3     | 1.6E-1  | 1.0E0     |
| <input type="checkbox"/> | INTERPRO         | <a href="#">Histidine kinase-like ATPase, ATP-binding domain</a>                 | <b>RT</b> |      | 3     | 4.9E-1  | 1.0E0     |
| <input type="checkbox"/> | KEGG_PATHWAY     | <a href="#">Prostate cancer</a>                                                  | <b>RT</b> |      | 5     | 9.8E-1  | 1.0E0     |
| Annotation Cluster 117   |                  | Enrichment Score: 0.85                                                           | <b>G</b>  |    | Count | P_Value | Benjamini |
| <input type="checkbox"/> | INTERPRO         | <a href="#">HSP20-like chaperone</a>                                             | <b>RT</b> |      | 7     | 1.6E-2  | 3.7E-1    |
| <input type="checkbox"/> | INTERPRO         | <a href="#">CS-like domain</a>                                                   | <b>RT</b> |      | 3     | 3.4E-1  | 1.0E0     |
| <input type="checkbox"/> | UP_SEQ_FEATURE   | domain:CS                                                                        | <b>RT</b> |      | 3     | 5.4E-1  | 1.0E0     |
| Annotation Cluster 118   |                  | Enrichment Score: 0.79                                                           | <b>G</b>  |    | Count | P_Value | Benjamini |
| <input type="checkbox"/> | UP_KEYWORDS      | <a href="#">Gamma-carboxyglutamic acid</a>                                       | <b>RT</b> |      | 5     | 8.1E-3  | 2.5E-2    |
| <input type="checkbox"/> | SMART            | <a href="#">GLA</a>                                                              | <b>RT</b> |      | 3     | 2.5E-1  | 9.1E-1    |
| <input type="checkbox"/> | INTERPRO         | <a href="#">Coagulation factor, subgroup, Gla domain</a>                         | <b>RT</b> |      | 3     | 2.5E-1  | 9.9E-1    |
| <input type="checkbox"/> | INTERPRO         | <a href="#">Gamma-carboxyglutamic acid-rich (GLA) domain</a>                     | <b>RT</b> |      | 3     | 3.1E-1  | 1.0E0     |
| <input type="checkbox"/> | UP_SEQ_FEATURE   | domain:Gla                                                                       | <b>RT</b> |      | 3     | 6.7E-1  | 1.0E0     |
| Annotation Cluster 119   |                  | Enrichment Score: 0.76                                                           | <b>G</b>  |    | Count | P_Value | Benjamini |
| <input type="checkbox"/> | GOTERM_MF_DIRECT | <a href="#">cysteine-type endopeptidase inhibitor activity</a>                   | <b>RT</b> |      | 6     | 9.1E-2  | 6.8E-1    |
| <input type="checkbox"/> | UP_KEYWORDS      | <a href="#">Thiol protease inhibitor</a>                                         | <b>RT</b> |      | 4     | 1.5E-1  | 3.0E-1    |
| <input type="checkbox"/> | INTERPRO         | <a href="#">Proteinase inhibitor I25, cystatin</a>                               | <b>RT</b> |      | 4     | 1.9E-1  | 9.8E-1    |
| <input type="checkbox"/> | SMART            | <a href="#">CY</a>                                                               | <b>RT</b> |      | 3     | 3.5E-1  | 9.7E-1    |
| Annotation Cluster 120   |                  | Enrichment Score: 0.69                                                           | <b>G</b>  |   | Count | P_Value | Benjamini |
| <input type="checkbox"/> | GOTERM_BP_DIRECT | <a href="#">positive regulation of early endosome to late endosome transport</a> | <b>RT</b> |    | 4     | 1.2E-2  | 4.2E-1    |
| <input type="checkbox"/> | GOTERM_BP_DIRECT | <a href="#">establishment of endothelial barrier</a>                             | <b>RT</b> |    | 5     | 3.2E-2  | 6.8E-1    |
| <input type="checkbox"/> | INTERPRO         | <a href="#">Ezrin/radixin/moesin</a>                                             | <b>RT</b> |    | 3     | 3.5E-2  | 5.9E-1    |
| <input type="checkbox"/> | INTERPRO         | <a href="#">Ezrin/radixin/moesin, C-terminal</a>                                 | <b>RT</b> |    | 3     | 3.5E-2  | 5.9E-1    |
| <input type="checkbox"/> | GOTERM_BP_DIRECT | <a href="#">positive regulation of protein localization to early endosome</a>    | <b>RT</b> |    | 3     | 4.4E-2  | 7.6E-1    |
| <input type="checkbox"/> | INTERPRO         | <a href="#">Moesin</a>                                                           | <b>RT</b> |    | 3     | 5.5E-2  | 7.3E-1    |
| <input type="checkbox"/> | PIR_SUPERFAMILY  | <a href="#">ezrin/radixin/moesin</a>                                             | <b>RT</b> |    | 3     | 1.0E-1  | 9.9E-1    |
| <input type="checkbox"/> | GOTERM_BP_DIRECT | <a href="#">positive regulation of cellular protein catabolic process</a>        | <b>RT</b> |    | 3     | 2.3E-1  | 9.9E-1    |
| <input type="checkbox"/> | UP_SEQ_FEATURE   | domain:FERM                                                                      | <b>RT</b> |    | 4     | 2.4E-1  | 1.0E0     |
| <input type="checkbox"/> | INTERPRO         | <a href="#">Ezrin/radixin/moesin like</a>                                        | <b>RT</b> |    | 3     | 2.8E-1  | 1.0E0     |
| <input type="checkbox"/> | INTERPRO         | <a href="#">FERM(acyl-CoA-binding protein, 3-helical bundle</a>                  | <b>RT</b> |    | 6     | 3.8E-1  | 1.0E0     |
| <input type="checkbox"/> | INTERPRO         | <a href="#">FERM conserved site</a>                                              | <b>RT</b> |    | 3     | 5.4E-1  | 1.0E0     |
| <input type="checkbox"/> | SMART            | <a href="#">SM01196</a>                                                          | <b>RT</b> |    | 3     | 5.4E-1  | 9.9E-1    |
| <input type="checkbox"/> | INTERPRO         | <a href="#">FERM, N-terminal</a>                                                 | <b>RT</b> |    | 3     | 6.1E-1  | 1.0E0     |
| <input type="checkbox"/> | INTERPRO         | <a href="#">FERM, C-terminal PH-like domain</a>                                  | <b>RT</b> |    | 3     | 6.3E-1  | 1.0E0     |
| <input type="checkbox"/> | SMART            | <a href="#">B41</a>                                                              | <b>RT</b> |    | 4     | 6.5E-1  | 1.0E0     |
| <input type="checkbox"/> | INTERPRO         | <a href="#">FERM domain</a>                                                      | <b>RT</b> |    | 4     | 7.3E-1  | 1.0E0     |
| <input type="checkbox"/> | INTERPRO         | <a href="#">FERM central domain</a>                                              | <b>RT</b> |    | 4     | 7.7E-1  | 1.0E0     |
| <input type="checkbox"/> | INTERPRO         | <a href="#">Band 4.1 domain</a>                                                  | <b>RT</b> |    | 4     | 7.7E-1  | 1.0E0     |
| <input type="checkbox"/> | GOTERM_CC_DIRECT | <a href="#">extrinsic component of membrane</a>                                  | <b>RT</b> |    | 4     | 8.8E-1  | 1.0E0     |
| Annotation Cluster 121   |                  | Enrichment Score: 0.66                                                           | <b>G</b>  |  | Count | P_Value | Benjamini |
| <input type="checkbox"/> | GOTERM_MF_DIRECT | <a href="#">structural constituent of ribosome</a>                               | <b>RT</b> |    | 28    | 4.4E-2  | 4.5E-1    |
| <input type="checkbox"/> | GOTERM_MF_DIRECT | <a href="#">large ribosomal subunit rRNA binding</a>                             | <b>RT</b> |    | 3     | 6.8E-2  | 5.9E-1    |
| <input type="checkbox"/> | GOTERM_BP_DIRECT | <a href="#">cytoplasmic translation</a>                                          | <b>RT</b> |    | 6     | 7.1E-2  | 8.7E-1    |
| <input type="checkbox"/> | GOTERM_CC_DIRECT | <a href="#">cytosolic large ribosomal subunit</a>                                | <b>RT</b> |    | 8     | 3.1E-1  | 8.0E-1    |
| <input type="checkbox"/> | GOTERM_CC_DIRECT | <a href="#">preribosome, large subunit precursor</a>                             | <b>RT</b> |    | 4     | 4.2E-1  | 8.9E-1    |
| <input type="checkbox"/> | UP_KEYWORDS      | <a href="#">Ribosomal protein</a>                                                | <b>RT</b> |    | 15    | 4.6E-1  | 7.0E-1    |

|                          | Annotation Cluster     | Enrichment Score                                                      |    |  | Count | P_Value | Benjamini |
|--------------------------|------------------------|-----------------------------------------------------------------------|----|--|-------|---------|-----------|
| <input type="checkbox"/> | UP_KEYWORDS            | <a href="#">Ribonucleoprotein</a>                                     | RT |  | 18    | 6.0E-1  | 8.3E-1    |
| <input type="checkbox"/> | KEGG_PATHWAY           | <a href="#">Ribosome</a>                                              | RT |  | 13    | 7.3E-1  | 9.1E-1    |
|                          | Annotation Cluster 122 | Enrichment Score: 0.63                                                | G  |  | Count | P_Value | Benjamini |
| <input type="checkbox"/> | SMART                  | <a href="#">ADF</a>                                                   | RT |  | 3     | 1.5E-1  | 7.7E-1    |
| <input type="checkbox"/> | INTERPRO               | <a href="#">Actin-binding_cofilin/tropomyosin_type</a>                | RT |  | 3     | 1.9E-1  | 9.8E-1    |
| <input type="checkbox"/> | UP_SEQ_FEATURE         | domain:ADF-H                                                          | RT |  | 3     | 4.6E-1  | 1.0E0     |
|                          | Annotation Cluster 123 | Enrichment Score: 0.63                                                | G  |  | Count | P_Value | Benjamini |
| <input type="checkbox"/> | SMART                  | <a href="#">UBX</a>                                                   | RT |  | 3     | 1.2E-1  | 7.2E-1    |
| <input type="checkbox"/> | INTERPRO               | <a href="#">UBX</a>                                                   | RT |  | 3     | 2.8E-1  | 1.0E0     |
| <input type="checkbox"/> | UP_SEQ_FEATURE         | domain:UBX                                                            | RT |  | 3     | 3.8E-1  | 1.0E0     |
|                          | Annotation Cluster 124 | Enrichment Score: 0.62                                                | G  |  | Count | P_Value | Benjamini |
| <input type="checkbox"/> | INTERPRO               | <a href="#">HIT-like domain</a>                                       | RT |  | 3     | 1.6E-1  | 9.6E-1    |
| <input type="checkbox"/> | UP_SEQ_FEATURE         | short sequence motif:Histidine triad motif                            | RT |  | 3     | 2.9E-1  | 1.0E0     |
| <input type="checkbox"/> | UP_SEQ_FEATURE         | domain:HIT                                                            | RT |  | 3     | 2.9E-1  | 1.0E0     |
|                          | Annotation Cluster 125 | Enrichment Score: 0.62                                                | G  |  | Count | P_Value | Benjamini |
| <input type="checkbox"/> | UP_SEQ_FEATURE         | domain:EGF-like 1                                                     | RT |  | 11    | 2.0E-2  | 8.5E-1    |
| <input type="checkbox"/> | INTERPRO               | <a href="#">Insulin-like growth factor binding protein_N-terminal</a> | RT |  | 15    | 5.6E-2  | 7.3E-1    |
| <input type="checkbox"/> | UP_KEYWORDS            | <a href="#">EGF-like domain</a>                                       | RT |  | 17    | 7.0E-2  | 1.6E-1    |
| <input type="checkbox"/> | UP_SEQ_FEATURE         | domain:EGF-like 3; calcium-binding                                    | RT |  | 5     | 7.1E-2  | 9.9E-1    |
| <input type="checkbox"/> | UP_SEQ_FEATURE         | domain:EGF-like 2; calcium-binding                                    | RT |  | 6     | 9.4E-2  | 1.0E0     |
| <input type="checkbox"/> | UP_SEQ_FEATURE         | domain:EGF-like 5; calcium-binding                                    | RT |  | 3     | 2.0E-1  | 1.0E0     |
| <input type="checkbox"/> | UP_SEQ_FEATURE         | domain:EGF-like 6; calcium-binding                                    | RT |  | 3     | 2.0E-1  | 1.0E0     |
| <input type="checkbox"/> | UP_SEQ_FEATURE         | domain:EGF-like 2                                                     | RT |  | 6     | 2.5E-1  | 1.0E0     |
| <input type="checkbox"/> | UP_SEQ_FEATURE         | domain:EGF-like 4                                                     | RT |  | 3     | 2.9E-1  | 1.0E0     |
| <input type="checkbox"/> | SMART                  | <a href="#">EGF_CA</a>                                                | RT |  | 9     | 4.9E-1  | 9.9E-1    |
| <input type="checkbox"/> | SMART                  | <a href="#">EGF</a>                                                   | RT |  | 11    | 6.3E-1  | 1.0E0     |
| <input type="checkbox"/> | INTERPRO               | <a href="#">EGF-like calcium-binding</a>                              | RT |  | 9     | 6.8E-1  | 1.0E0     |
| <input type="checkbox"/> | INTERPRO               | <a href="#">EGF-like calcium-binding_conserved site</a>               | RT |  | 7     | 7.1E-1  | 1.0E0     |
| <input type="checkbox"/> | INTERPRO               | <a href="#">EGF-type aspartate/asparagine hydroxylation site</a>      | RT |  | 7     | 7.4E-1  | 1.0E0     |
| <input type="checkbox"/> | INTERPRO               | <a href="#">EGF-like_conserved site</a>                               | RT |  | 12    | 8.3E-1  | 1.0E0     |
| <input type="checkbox"/> | INTERPRO               | <a href="#">Epidermal growth factor-like domain</a>                   | RT |  | 13    | 8.8E-1  | 1.0E0     |
|                          | Annotation Cluster 126 | Enrichment Score: 0.61                                                | G  |  | Count | P_Value | Benjamini |
| <input type="checkbox"/> | SMART                  | <a href="#">DEFSN</a>                                                 | RT |  | 3     | 2.0E-1  | 8.6E-1    |
| <input type="checkbox"/> | UP_KEYWORDS            | <a href="#">Defensin</a>                                              | RT |  | 4     | 2.3E-1  | 4.3E-1    |
| <input type="checkbox"/> | INTERPRO               | <a href="#">Beta defensin/Neutrophil defensin</a>                     | RT |  | 3     | 2.5E-1  | 9.9E-1    |
| <input type="checkbox"/> | INTERPRO               | <a href="#">Beta defensin type</a>                                    | RT |  | 3     | 3.1E-1  | 1.0E0     |
|                          | Annotation Cluster 127 | Enrichment Score: 0.61                                                | G  |  | Count | P_Value | Benjamini |
| <input type="checkbox"/> | INTERPRO               | <a href="#">Septin</a>                                                | RT |  | 4     | 9.8E-2  | 8.9E-1    |
| <input type="checkbox"/> | PIR_SUPERFAMILY        | <a href="#">septin</a>                                                | RT |  | 4     | 2.9E-1  | 1.0E0     |
| <input type="checkbox"/> | UP_SEQ_FEATURE         | binding site:GTP                                                      | RT |  | 5     | 3.5E-1  | 1.0E0     |
| <input type="checkbox"/> | UP_SEQ_FEATURE         | binding site:GTP; via amide nitrogen and carbonyl oxygen              | RT |  | 4     | 3.7E-1  | 1.0E0     |
|                          | Annotation Cluster 128 | Enrichment Score: 0.6                                                 | G  |  | Count | P_Value | Benjamini |
| <input type="checkbox"/> | SMART                  | <a href="#">SM01394</a>                                               | RT |  | 5     | 6.8E-2  | 5.9E-1    |
| <input type="checkbox"/> | INTERPRO               | <a href="#">S100/CaBP-9k-type_calcium binding_subdomain</a>           | RT |  | 5     | 1.1E-1  | 9.1E-1    |
| <input type="checkbox"/> | INTERPRO               | <a href="#">S100/Calbindin-D9k_conserved site</a>                     | RT |  | 3     | 4.6E-1  | 1.0E0     |
| <input type="checkbox"/> | UP_SEQ_FEATURE         | calcium-binding region:1; low affinity                                | RT |  | 4     | 4.9E-1  | 1.0E0     |
| <input type="checkbox"/> | UP_SEQ_FEATURE         | calcium-binding region:2; high affinity                               | RT |  | 4     | 5.5E-1  | 1.0E0     |
|                          | Annotation Cluster 129 | Enrichment Score: 0.59                                                | G  |  | Count | P_Value | Benjamini |
| <input type="checkbox"/> | UP_KEYWORDS            | <a href="#">Synapse</a>                                               | RT |  | 19    | 2.4E-2  | 6.3E-2    |
| <input type="checkbox"/> | UP_KEYWORDS            | <a href="#">Postsynaptic cell membrane</a>                            | RT |  | 7     | 4.7E-1  | 7.1E-1    |
| <input type="checkbox"/> | GOTERM_CC_DIRECT       | <a href="#">postsynaptic density</a>                                  | RT |  | 7     | 4.9E-1  | 9.2E-1    |
| <input type="checkbox"/> | GOTERM_CC_DIRECT       | <a href="#">postsynaptic membrane</a>                                 | RT |  | 8     | 7.9E-1  | 9.9E-1    |
|                          | Annotation Cluster 130 | Enrichment Score: 0.57                                                | G  |  | Count | P_Value | Benjamini |

| Annotation Cluster 1     |                  | Enrichment Score: 57.69                                              | <b>G</b>           |     | Count | P_Value | Benjamini |
|--------------------------|------------------|----------------------------------------------------------------------|--------------------|---------------------------------------------------------------------------------------|-------|---------|-----------|
| <input type="checkbox"/> | INTERPRO         | <a href="#">Apolipoprotein A1/A4/E</a>                               | <a href="#">RT</a> |      | 3     | 5.5E-2  | 7.3E-1    |
| <input type="checkbox"/> | UP_SEQ_FEATURE   | repeat:8                                                             | <a href="#">RT</a> |      | 8     | 9.3E-2  | 1.0E0     |
| <input type="checkbox"/> | UP_SEQ_FEATURE   | repeat:6                                                             | <a href="#">RT</a> |      | 9     | 1.0E-1  | 1.0E0     |
| <input type="checkbox"/> | UP_SEQ_FEATURE   | repeat:5                                                             | <a href="#">RT</a> |      | 9     | 1.0E-1  | 1.0E0     |
| <input type="checkbox"/> | GOTERM_BP_DIRECT | <a href="#">very-low-density lipoprotein particle remodeling</a>     | <a href="#">RT</a> |      | 3     | 1.3E-1  | 9.6E-1    |
| <input type="checkbox"/> | UP_SEQ_FEATURE   | repeat:7                                                             | <a href="#">RT</a> |      | 8     | 1.5E-1  | 1.0E0     |
| <input type="checkbox"/> | UP_SEQ_FEATURE   | repeat:9                                                             | <a href="#">RT</a> |      | 5     | 3.0E-1  | 1.0E0     |
| <input type="checkbox"/> | UP_SEQ_FEATURE   | repeat:10                                                            | <a href="#">RT</a> |      | 5     | 3.5E-1  | 1.0E0     |
| <input type="checkbox"/> | UP_SEQ_FEATURE   | repeat:12                                                            | <a href="#">RT</a> |      | 4     | 4.3E-1  | 1.0E0     |
| <input type="checkbox"/> | UP_SEQ_FEATURE   | repeat:4                                                             | <a href="#">RT</a> |      | 11    | 4.8E-1  | 1.0E0     |
| <input type="checkbox"/> | UP_SEQ_FEATURE   | repeat:11                                                            | <a href="#">RT</a> |      | 4     | 4.9E-1  | 1.0E0     |
| <input type="checkbox"/> | UP_SEQ_FEATURE   | repeat:13                                                            | <a href="#">RT</a> |      | 3     | 6.7E-1  | 1.0E0     |
| <input type="checkbox"/> | UP_SEQ_FEATURE   | repeat:3                                                             | <a href="#">RT</a> |      | 10    | 7.1E-1  | 1.0E0     |
| <input type="checkbox"/> | UP_SEQ_FEATURE   | repeat:1                                                             | <a href="#">RT</a> |      | 12    | 7.7E-1  | 1.0E0     |
| <input type="checkbox"/> | UP_SEQ_FEATURE   | repeat:2                                                             | <a href="#">RT</a> |      | 12    | 7.9E-1  | 1.0E0     |
| Annotation Cluster 131   |                  | Enrichment Score: 0.55                                               | <b>G</b>           |    | Count | P_Value | Benjamini |
| <input type="checkbox"/> | INTERPRO         | <a href="#">Cytochrome c domain</a>                                  | <a href="#">RT</a> |      | 3     | 3.5E-2  | 5.9E-1    |
| <input type="checkbox"/> | UP_SEQ_FEATURE   | binding site:Heme (covalent)                                         | <a href="#">RT</a> |      | 3     | 1.2E-1  | 1.0E0     |
| <input type="checkbox"/> | UP_KEYWORDS      | <a href="#">Heme</a>                                                 | <a href="#">RT</a> |      | 9     | 5.9E-1  | 8.2E-1    |
| <input type="checkbox"/> | GOTERM_MF_DIRECT | <a href="#">heme binding</a>                                         | <a href="#">RT</a> |      | 10    | 7.7E-1  | 1.0E0     |
| <input type="checkbox"/> | UP_SEQ_FEATURE   | metal ion-binding site:Iron (heme axial ligand)                      | <a href="#">RT</a> |      | 5     | 9.8E-1  | 1.0E0     |
| Annotation Cluster 132   |                  | Enrichment Score: 0.54                                               | <b>G</b>           |    | Count | P_Value | Benjamini |
| <input type="checkbox"/> | GOTERM_BP_DIRECT | <a href="#">actin filament bundle assembly</a>                       | <a href="#">RT</a> |      | 6     | 8.1E-2  | 9.0E-1    |
| <input type="checkbox"/> | GOTERM_BP_DIRECT | <a href="#">actin filament network formation</a>                     | <a href="#">RT</a> |      | 3     | 1.6E-1  | 9.7E-1    |
| <input type="checkbox"/> | INTERPRO         | <a href="#">Actinin-type, actin-binding, conserved site</a>          | <a href="#">RT</a> |     | 4     | 1.9E-1  | 9.8E-1    |
| <input type="checkbox"/> | GOTERM_BP_DIRECT | <a href="#">actin crosslink formation</a>                            | <a href="#">RT</a> |    | 3     | 2.3E-1  | 9.9E-1    |
| <input type="checkbox"/> | SMART            | <a href="#">CH</a>                                                   | <a href="#">RT</a> |    | 6     | 3.5E-1  | 9.7E-1    |
| <input type="checkbox"/> | UP_SEQ_FEATURE   | domain:CH 1                                                          | <a href="#">RT</a> |    | 3     | 3.8E-1  | 1.0E0     |
| <input type="checkbox"/> | UP_SEQ_FEATURE   | domain:CH 2                                                          | <a href="#">RT</a> |    | 3     | 3.8E-1  | 1.0E0     |
| <input type="checkbox"/> | INTERPRO         | <a href="#">Calponin homology domain</a>                             | <a href="#">RT</a> |    | 6     | 6.4E-1  | 1.0E0     |
| <input type="checkbox"/> | COG_ONTOLOGY     | <a href="#">Cytoskeleton</a>                                         | <a href="#">RT</a> |    | 3     | 7.3E-1  | 9.8E-1    |
| Annotation Cluster 133   |                  | Enrichment Score: 0.54                                               | <b>G</b>           |  | Count | P_Value | Benjamini |
| <input type="checkbox"/> | GOTERM_CC_DIRECT | <a href="#">eukaryotic translation initiation factor 3 complex</a>   | <a href="#">RT</a> |    | 4     | 9.8E-2  | 4.6E-1    |
| <input type="checkbox"/> | GOTERM_BP_DIRECT | <a href="#">regulation of translational initiation</a>               | <a href="#">RT</a> |    | 5     | 2.1E-1  | 9.9E-1    |
| <input type="checkbox"/> | GOTERM_BP_DIRECT | <a href="#">translational initiation</a>                             | <a href="#">RT</a> |    | 5     | 2.7E-1  | 1.0E0     |
| <input type="checkbox"/> | UP_KEYWORDS      | <a href="#">Initiation factor</a>                                    | <a href="#">RT</a> |    | 6     | 2.8E-1  | 5.0E-1    |
| <input type="checkbox"/> | GOTERM_CC_DIRECT | <a href="#">eukaryotic 48S preinitiation complex</a>                 | <a href="#">RT</a> |    | 3     | 3.5E-1  | 8.4E-1    |
| <input type="checkbox"/> | GOTERM_CC_DIRECT | <a href="#">eukaryotic 43S preinitiation complex</a>                 | <a href="#">RT</a> |    | 3     | 3.5E-1  | 8.4E-1    |
| <input type="checkbox"/> | GOTERM_MF_DIRECT | <a href="#">translation initiation factor activity</a>               | <a href="#">RT</a> |    | 6     | 4.8E-1  | 1.0E0     |
| <input type="checkbox"/> | GOTERM_BP_DIRECT | <a href="#">formation of translation preinitiation complex</a>       | <a href="#">RT</a> |    | 3     | 5.8E-1  | 1.0E0     |
| Annotation Cluster 134   |                  | Enrichment Score: 0.53                                               | <b>G</b>           |  | Count | P_Value | Benjamini |
| <input type="checkbox"/> | INTERPRO         | <a href="#">Aldo/keto reductase</a>                                  | <a href="#">RT</a> |    | 4     | 1.9E-1  | 9.8E-1    |
| <input type="checkbox"/> | UP_SEQ_FEATURE   | site:Lowers pKa of active site Tyr                                   | <a href="#">RT</a> |    | 3     | 2.0E-1  | 1.0E0     |
| <input type="checkbox"/> | INTERPRO         | <a href="#">NADP-dependent oxidoreductase domain</a>                 | <a href="#">RT</a> |    | 4     | 2.2E-1  | 9.9E-1    |
| <input type="checkbox"/> | INTERPRO         | <a href="#">Aldo/keto reductase subgroup</a>                         | <a href="#">RT</a> |    | 3     | 3.4E-1  | 1.0E0     |
| <input type="checkbox"/> | INTERPRO         | <a href="#">Aldo/keto reductase, conserved site</a>                  | <a href="#">RT</a> |    | 3     | 3.4E-1  | 1.0E0     |
| <input type="checkbox"/> | PIR_SUPERFAMILY  | <a href="#">aldo-keto reductase</a>                                  | <a href="#">RT</a> |    | 3     | 6.7E-1  | 1.0E0     |
| Annotation Cluster 135   |                  | Enrichment Score: 0.52                                               | <b>G</b>           |  | Count | P_Value | Benjamini |
| <input type="checkbox"/> | INTERPRO         | <a href="#">Netrin domain</a>                                        | <a href="#">RT</a> |    | 4     | 2.6E-1  | 9.9E-1    |
| <input type="checkbox"/> | INTERPRO         | <a href="#">Tissue inhibitor of metalloproteinases-like, OB-fold</a> | <a href="#">RT</a> |    | 4     | 2.8E-1  | 1.0E0     |
| <input type="checkbox"/> | UP_SEQ_FEATURE   | domain:NTR                                                           | <a href="#">RT</a> |    | 4     | 3.7E-1  | 1.0E0     |
| Annotation Cluster 136   |                  | Enrichment Score: 0.52                                               | <b>G</b>           |  | Count | P_Value | Benjamini |

|                          | Annotation Cluster 1   | Enrichment Score: 57.69                                                                | <b>G</b> |   | Count | P_Value | Benjamini |
|--------------------------|------------------------|----------------------------------------------------------------------------------------|----------|-------------------------------------------------------------------------------------|-------|---------|-----------|
| <input type="checkbox"/> | UP_KEYWORDS            | <a href="#">Centromere</a>                                                             | RT       |    | 8     | 1.5E-1  | 3.1E-1    |
| <input type="checkbox"/> | GOTERM_CC_DIRECT       | <a href="#">condensed chromosome kinetochore</a>                                       | RT       |    | 5     | 4.3E-1  | 8.9E-1    |
| <input type="checkbox"/> | UP_KEYWORDS            | <a href="#">Kinetochore</a>                                                            | RT       |    | 5     | 4.3E-1  | 6.7E-1    |
|                          | Annotation Cluster 137 | Enrichment Score: 0.52                                                                 | <b>G</b> |  | Count | P_Value | Benjamini |
| <input type="checkbox"/> | GOTERM_CC_DIRECT       | <a href="#">protein phosphatase type 2A complex</a>                                    | RT       |    | 5     | 5.5E-2  | 3.3E-1    |
| <input type="checkbox"/> | GOTERM_CC_DIRECT       | <a href="#">chromosome, centromeric region</a>                                         | RT       |    | 4     | 5.2E-1  | 9.3E-1    |
| <input type="checkbox"/> | KEGG_PATHWAY           | <a href="#">Hepatitis C</a>                                                            | RT       |    | 6     | 1.0E0   | 1.0E0     |
|                          | Annotation Cluster 138 | Enrichment Score: 0.5                                                                  | <b>G</b> |  | Count | P_Value | Benjamini |
| <input type="checkbox"/> | KEGG_PATHWAY           | <a href="#">Endocrine and other factor-regulated calcium reabsorption</a>              | RT       |    | 11    | 8.2E-3  | 5.4E-2    |
| <input type="checkbox"/> | KEGG_PATHWAY           | <a href="#">Oocyte meiosis</a>                                                         | RT       |    | 21    | 1.1E-2  | 6.9E-2    |
| <input type="checkbox"/> | GOTERM_CC_DIRECT       | <a href="#">heterotrimeric G-protein complex</a>                                       | RT       |    | 8     | 1.3E-2  | 1.1E-1    |
| <input type="checkbox"/> | KEGG_PATHWAY           | <a href="#">Estrogen signaling pathway</a>                                             | RT       |    | 17    | 3.9E-2  | 2.0E-1    |
| <input type="checkbox"/> | UP_KEYWORDS            | <a href="#">Sodium/potassium transport</a>                                             | RT       |    | 3     | 5.3E-2  | 1.3E-1    |
| <input type="checkbox"/> | KEGG_PATHWAY           | <a href="#">Proximal tubule bicarbonate reclamation</a>                                | RT       |    | 6     | 6.6E-2  | 2.8E-1    |
| <input type="checkbox"/> | GOTERM_BP_DIRECT       | <a href="#">establishment or maintenance of transmembrane electrochemical gradient</a> | RT       |    | 3     | 6.8E-2  | 8.7E-1    |
| <input type="checkbox"/> | KEGG_PATHWAY           | <a href="#">Salivary secretion</a>                                                     | RT       |    | 14    | 7.6E-2  | 3.1E-1    |
| <input type="checkbox"/> | KEGG_PATHWAY           | <a href="#">Adrenergic signaling in cardiomyocytes</a>                                 | RT       |    | 20    | 9.6E-2  | 3.5E-1    |
| <input type="checkbox"/> | KEGG_PATHWAY           | <a href="#">cGMP-PKG signaling pathway</a>                                             | RT       |    | 22    | 1.3E-1  | 4.2E-1    |
| <input type="checkbox"/> | KEGG_PATHWAY           | <a href="#">Platelet activation</a>                                                    | RT       |    | 18    | 1.5E-1  | 4.4E-1    |
| <input type="checkbox"/> | GOTERM_CC_DIRECT       | <a href="#">sodium:potassium-exchanging ATPase complex</a>                             | RT       |    | 3     | 1.5E-1  | 5.8E-1    |
| <input type="checkbox"/> | GOTERM_MF_DIRECT       | <a href="#">sodium:potassium-exchanging ATPase activity</a>                            | RT       |    | 3     | 1.6E-1  | 8.3E-1    |
| <input type="checkbox"/> | GOTERM_BP_DIRECT       | <a href="#">sodium ion export from cell</a>                                            | RT       |    | 3     | 1.6E-1  | 9.7E-1    |
| <input type="checkbox"/> | KEGG_PATHWAY           | <a href="#">Thyroid hormone synthesis</a>                                              | RT       |    | 11    | 1.6E-1  | 4.6E-1    |
| <input type="checkbox"/> | GOTERM_BP_DIRECT       | <a href="#">cellular potassium ion homeostasis</a>                                     | RT       |    | 3     | 1.9E-1  | 9.9E-1    |
| <input type="checkbox"/> | KEGG_PATHWAY           | <a href="#">Gastric acid secretion</a>                                                 | RT       |    | 11    | 1.9E-1  | 5.0E-1    |
| <input type="checkbox"/> | UP_KEYWORDS            | <a href="#">Potassium</a>                                                              | RT       |    | 9     | 2.3E-1  | 4.3E-1    |
| <input type="checkbox"/> | KEGG_PATHWAY           | <a href="#">Dopaminergic synapse</a>                                                   | RT       |    | 17    | 2.3E-1  | 5.5E-1    |
| <input type="checkbox"/> | KEGG_PATHWAY           | <a href="#">Mineral absorption</a>                                                     | RT       |   | 7     | 2.9E-1  | 6.3E-1    |
| <input type="checkbox"/> | KEGG_PATHWAY           | <a href="#">Vascular smooth muscle contraction</a>                                     | RT       |  | 15    | 3.3E-1  | 6.7E-1    |
| <input type="checkbox"/> | KEGG_PATHWAY           | <a href="#">Long-term potentiation</a>                                                 | RT       |  | 9     | 3.4E-1  | 6.8E-1    |
| <input type="checkbox"/> | GOTERM_BP_DIRECT       | <a href="#">cellular sodium ion homeostasis</a>                                        | RT       |  | 3     | 3.7E-1  | 1.0E0     |
| <input type="checkbox"/> | KEGG_PATHWAY           | <a href="#">Amphetamine addiction</a>                                                  | RT       |  | 9     | 3.7E-1  | 7.2E-1    |
| <input type="checkbox"/> | KEGG_PATHWAY           | <a href="#">Bile secretion</a>                                                         | RT       |  | 9     | 3.9E-1  | 7.3E-1    |
| <input type="checkbox"/> | KEGG_PATHWAY           | <a href="#">Carbohydrate digestion and absorption</a>                                  | RT       |  | 6     | 4.1E-1  | 7.4E-1    |
| <input type="checkbox"/> | KEGG_PATHWAY           | <a href="#">Glutamatergic synapse</a>                                                  | RT       |  | 13    | 4.9E-1  | 8.1E-1    |
| <input type="checkbox"/> | KEGG_PATHWAY           | <a href="#">Renin secretion</a>                                                        | RT       |  | 8     | 5.2E-1  | 8.3E-1    |
| <input type="checkbox"/> | KEGG_PATHWAY           | <a href="#">Oxytocin signaling pathway</a>                                             | RT       |  | 16    | 5.2E-1  | 8.3E-1    |
| <input type="checkbox"/> | KEGG_PATHWAY           | <a href="#">Dilated cardiomyopathy</a>                                                 | RT       |  | 10    | 5.2E-1  | 8.3E-1    |
| <input type="checkbox"/> | KEGG_PATHWAY           | <a href="#">cAMP signaling pathway</a>                                                 | RT       |  | 21    | 5.5E-1  | 8.4E-1    |
| <input type="checkbox"/> | UP_KEYWORDS            | <a href="#">Potassium transport</a>                                                    | RT       |  | 6     | 5.6E-1  | 8.0E-1    |
| <input type="checkbox"/> | KEGG_PATHWAY           | <a href="#">Aldosterone-regulated sodium reabsorption</a>                              | RT       |  | 5     | 5.7E-1  | 8.4E-1    |
| <input type="checkbox"/> | KEGG_PATHWAY           | <a href="#">Insulin secretion</a>                                                      | RT       |  | 9     | 6.1E-1  | 8.6E-1    |
| <input type="checkbox"/> | GOTERM_BP_DIRECT       | <a href="#">potassium ion import</a>                                                   | RT       |  | 3     | 6.3E-1  | 1.0E0     |
| <input type="checkbox"/> | KEGG_PATHWAY           | <a href="#">Protein digestion and absorption</a>                                       | RT       |  | 9     | 6.3E-1  | 8.7E-1    |
| <input type="checkbox"/> | KEGG_PATHWAY           | <a href="#">GnRH signaling pathway</a>                                                 | RT       |  | 9     | 6.6E-1  | 8.9E-1    |
| <input type="checkbox"/> | KEGG_PATHWAY           | <a href="#">Circadian entrainment</a>                                                  | RT       |  | 10    | 6.7E-1  | 8.9E-1    |
| <input type="checkbox"/> | KEGG_PATHWAY           | <a href="#">Regulation of lipolysis in adipocytes</a>                                  | RT       |  | 6     | 6.7E-1  | 8.9E-1    |
| <input type="checkbox"/> | KEGG_PATHWAY           | <a href="#">GABAergic synapse</a>                                                      | RT       |  | 9     | 6.7E-1  | 8.9E-1    |
| <input type="checkbox"/> | KEGG_PATHWAY           | <a href="#">Cholinergic synapse</a>                                                    | RT       |  | 11    | 7.0E-1  | 9.0E-1    |
| <input type="checkbox"/> | KEGG_PATHWAY           | <a href="#">Morphine addiction</a>                                                     | RT       |  | 9     | 7.5E-1  | 9.1E-1    |
| <input type="checkbox"/> | KEGG_PATHWAY           | <a href="#">Inflammatory mediator regulation of TRP channels</a>                       | RT       |  | 10    | 7.5E-1  | 9.1E-1    |
| <input type="checkbox"/> | KEGG_PATHWAY           | <a href="#">Cocaine addiction</a>                                                      | RT       |  | 5     | 7.5E-1  | 9.1E-1    |

| Annotation Cluster 1     |                  | Enrichment Score: 57.69                                                                | <b>G</b>           |     | Count | P_Value | Benjamini |
|--------------------------|------------------|----------------------------------------------------------------------------------------|--------------------|---------------------------------------------------------------------------------------|-------|---------|-----------|
| <input type="checkbox"/> | KEGG_PATHWAY     | <a href="#">Ovarian steroidogenesis</a>                                                | <a href="#">RT</a> |      | 5     | 7.6E-1  | 9.2E-1    |
| <input type="checkbox"/> | UP_KEYWORDS      | <a href="#">Sodium transport</a>                                                       | <a href="#">RT</a> |      | 4     | 8.3E-1  | 9.6E-1    |
| <input type="checkbox"/> | KEGG_PATHWAY     | <a href="#">Aldosterone synthesis and secretion</a>                                    | <a href="#">RT</a> |      | 7     | 8.3E-1  | 9.5E-1    |
| <input type="checkbox"/> | KEGG_PATHWAY     | <a href="#">Serotonergic synapse</a>                                                   | <a href="#">RT</a> |      | 10    | 8.5E-1  | 9.5E-1    |
| <input type="checkbox"/> | KEGG_PATHWAY     | <a href="#">Chemokine signaling pathway</a>                                            | <a href="#">RT</a> |      | 16    | 8.6E-1  | 9.6E-1    |
| <input type="checkbox"/> | UP_KEYWORDS      | <a href="#">Sodium</a>                                                                 | <a href="#">RT</a> |      | 4     | 8.6E-1  | 9.7E-1    |
| <input type="checkbox"/> | KEGG_PATHWAY     | <a href="#">Progesterone-mediated oocyte maturation</a>                                | <a href="#">RT</a> |      | 7     | 9.0E-1  | 9.7E-1    |
| <input type="checkbox"/> | KEGG_PATHWAY     | <a href="#">Thyroid hormone signaling pathway</a>                                      | <a href="#">RT</a> |      | 9     | 9.0E-1  | 9.7E-1    |
| <input type="checkbox"/> | KEGG_PATHWAY     | <a href="#">Retrograde endocannabinoid signaling</a>                                   | <a href="#">RT</a> |      | 8     | 9.2E-1  | 9.7E-1    |
| <input type="checkbox"/> | KEGG_PATHWAY     | <a href="#">Melanogenesis</a>                                                          | <a href="#">RT</a> |      | 7     | 9.5E-1  | 9.9E-1    |
| <input type="checkbox"/> | GOTERM_BP_DIRECT | <a href="#">potassium ion transmembrane transport</a>                                  | <a href="#">RT</a> |      | 3     | 9.5E-1  | 1.0E0     |
| <input type="checkbox"/> | UP_KEYWORDS      | <a href="#">Ion channel</a>                                                            | <a href="#">RT</a> |      | 5     | 1.0E0   | 1.0E0     |
| <input type="checkbox"/> | KEGG_PATHWAY     | <a href="#">Olfactory transduction</a>                                                 | <a href="#">RT</a> |      | 3     | 1.0E0   | 1.0E0     |
| Annotation Cluster 139   |                  | Enrichment Score: 0.48                                                                 | <b>G</b>           |    | Count | P_Value | Benjamini |
| <input type="checkbox"/> | UP_SEQ_FEATURE   | domain:VWFA                                                                            | <a href="#">RT</a> |      | 7     | 1.7E-1  | 1.0E0     |
| <input type="checkbox"/> | SMART            | <a href="#">VWA</a>                                                                    | <a href="#">RT</a> |      | 6     | 4.6E-1  | 9.9E-1    |
| <input type="checkbox"/> | INTERPRO         | <a href="#">von Willebrand factor, type A</a>                                          | <a href="#">RT</a> |      | 9     | 4.7E-1  | 1.0E0     |
| Annotation Cluster 140   |                  | Enrichment Score: 0.48                                                                 | <b>G</b>           |    | Count | P_Value | Benjamini |
| <input type="checkbox"/> | SMART            | <a href="#">MORN</a>                                                                   | <a href="#">RT</a> |      | 3     | 2.5E-1  | 9.1E-1    |
| <input type="checkbox"/> | INTERPRO         | <a href="#">MORN motif</a>                                                             | <a href="#">RT</a> |      | 3     | 3.4E-1  | 1.0E0     |
| <input type="checkbox"/> | UP_SEQ_FEATURE   | repeat:MORN 1                                                                          | <a href="#">RT</a> |      | 3     | 3.8E-1  | 1.0E0     |
| <input type="checkbox"/> | UP_SEQ_FEATURE   | repeat:MORN 2                                                                          | <a href="#">RT</a> |      | 3     | 3.8E-1  | 1.0E0     |
| Annotation Cluster 141   |                  | Enrichment Score: 0.46                                                                 | <b>G</b>           |    | Count | P_Value | Benjamini |
| <input type="checkbox"/> | INTERPRO         | <a href="#">Protein phosphatase 2C, manganese/magnesium aspartate binding site</a>     | <a href="#">RT</a> |      | 3     | 2.2E-1  | 9.9E-1    |
| <input type="checkbox"/> | INTERPRO         | <a href="#">Protein phosphatase 2C</a>                                                 | <a href="#">RT</a> |      | 3     | 3.7E-1  | 1.0E0     |
| <input type="checkbox"/> | SMART            | <a href="#">PP2Cc</a>                                                                  | <a href="#">RT</a> |     | 3     | 3.8E-1  | 9.7E-1    |
| <input type="checkbox"/> | INTERPRO         | <a href="#">Protein phosphatase 2C (PP2C)-like</a>                                     | <a href="#">RT</a> |    | 3     | 4.6E-1  | 1.0E0     |
| Annotation Cluster 142   |                  | Enrichment Score: 0.45                                                                 | <b>G</b>           |  | Count | P_Value | Benjamini |
| <input type="checkbox"/> | INTERPRO         | <a href="#">Peptidase C12, ubiquitin carboxyl-terminal hydrolase 1</a>                 | <a href="#">RT</a> |    | 3     | 3.5E-2  | 5.9E-1    |
| <input type="checkbox"/> | GOTERM_BP_DIRECT | <a href="#">protein deubiquitination</a>                                               | <a href="#">RT</a> |    | 7     | 3.5E-1  | 1.0E0     |
| <input type="checkbox"/> | GOTERM_MF_DIRECT | <a href="#">thiol-dependent ubiquitin-specific protease activity</a>                   | <a href="#">RT</a> |    | 7     | 5.7E-1  | 1.0E0     |
| <input type="checkbox"/> | INTERPRO         | <a href="#">Peptidase C19, ubiquitin carboxyl-terminal hydrolase 2, conserved site</a> | <a href="#">RT</a> |    | 3     | 8.8E-1  | 1.0E0     |
| <input type="checkbox"/> | INTERPRO         | <a href="#">Peptidase C19, ubiquitin carboxyl-terminal hydrolase 2</a>                 | <a href="#">RT</a> |    | 3     | 9.1E-1  | 1.0E0     |
| Annotation Cluster 143   |                  | Enrichment Score: 0.45                                                                 | <b>G</b>           |  | Count | P_Value | Benjamini |
| <input type="checkbox"/> | SMART            | <a href="#">SM01391</a>                                                                | <a href="#">RT</a> |    | 9     | 8.0E-2  | 6.3E-1    |
| <input type="checkbox"/> | UP_KEYWORDS      | <a href="#">Keratin</a>                                                                | <a href="#">RT</a> |    | 8     | 9.6E-2  | 2.1E-1    |
| <input type="checkbox"/> | INTERPRO         | <a href="#">Type II keratin</a>                                                        | <a href="#">RT</a> |    | 5     | 1.2E-1  | 9.3E-1    |
| <input type="checkbox"/> | UP_KEYWORDS      | <a href="#">Intermediate filament</a>                                                  | <a href="#">RT</a> |    | 9     | 1.5E-1  | 3.1E-1    |
| <input type="checkbox"/> | INTERPRO         | <a href="#">Intermediate filament protein, conserved site</a>                          | <a href="#">RT</a> |    | 8     | 1.6E-1  | 9.6E-1    |
| <input type="checkbox"/> | INTERPRO         | <a href="#">Intermediate filament protein</a>                                          | <a href="#">RT</a> |    | 9     | 2.2E-1  | 9.9E-1    |
| <input type="checkbox"/> | UP_SEQ_FEATURE   | site:Stutter                                                                           | <a href="#">RT</a> |    | 7     | 3.3E-1  | 1.0E0     |
| <input type="checkbox"/> | GOTERM_CC_DIRECT | <a href="#">intermediate filament</a>                                                  | <a href="#">RT</a> |    | 7     | 3.3E-1  | 8.2E-1    |
| <input type="checkbox"/> | INTERPRO         | <a href="#">Keratin, type I</a>                                                        | <a href="#">RT</a> |    | 4     | 4.2E-1  | 1.0E0     |
| <input type="checkbox"/> | GOTERM_MF_DIRECT | <a href="#">structural molecule activity</a>                                           | <a href="#">RT</a> |    | 15    | 4.4E-1  | 9.9E-1    |
| <input type="checkbox"/> | UP_SEQ_FEATURE   | region of interest:Head                                                                | <a href="#">RT</a> |    | 9     | 4.9E-1  | 1.0E0     |
| <input type="checkbox"/> | GOTERM_CC_DIRECT | <a href="#">keratin filament</a>                                                       | <a href="#">RT</a> |    | 6     | 5.1E-1  | 9.3E-1    |
| <input type="checkbox"/> | UP_SEQ_FEATURE   | region of interest:Linker 12                                                           | <a href="#">RT</a> |    | 8     | 5.8E-1  | 1.0E0     |
| <input type="checkbox"/> | UP_SEQ_FEATURE   | region of interest:Coil 1B                                                             | <a href="#">RT</a> |    | 8     | 6.2E-1  | 1.0E0     |
| <input type="checkbox"/> | UP_SEQ_FEATURE   | region of interest:Coil 1A                                                             | <a href="#">RT</a> |    | 8     | 6.2E-1  | 1.0E0     |
| <input type="checkbox"/> | UP_SEQ_FEATURE   | region of interest:Linker 1                                                            | <a href="#">RT</a> |    | 8     | 6.2E-1  | 1.0E0     |
| <input type="checkbox"/> | UP_SEQ_FEATURE   | region of interest:Coil 2                                                              | <a href="#">RT</a> |    | 8     | 6.5E-1  | 1.0E0     |



|                          | Annotation Cluster | Enrichment Score                                                                               |                    |          | Count | P_Value | Benjamini |
|--------------------------|--------------------|------------------------------------------------------------------------------------------------|--------------------|----------|-------|---------|-----------|
| <input type="checkbox"/> | UP_SEQ_FEATURE     | Annotation Cluster 1                                                                           | 57.69              | <b>G</b> |       |         |           |
|                          |                    | region of interest:Rod                                                                         | <a href="#">RT</a> |          | 9     | 6.8E-1  | 1.0E0     |
| <input type="checkbox"/> | UP_SEQ_FEATURE     | region of interest:Tail                                                                        | <a href="#">RT</a> |          | 8     | 7.9E-1  | 1.0E0     |
| <input type="checkbox"/> | UP_SEQ_FEATURE     | compositionally biased region:Gly-rich                                                         | <a href="#">RT</a> |          | 7     | 9.9E-1  | 1.0E0     |
| <input type="checkbox"/> | UP_SEQ_FEATURE     | Annotation Cluster 144                                                                         | 0.44               | <b>G</b> |       |         |           |
|                          |                    | domain:Sema                                                                                    | <a href="#">RT</a> |          | 3     | 1.2E-1  | 1.0E0     |
| <input type="checkbox"/> | GOTERM_BP_DIRECT   | <a href="#">semaphorin-plexin signaling pathway</a>                                            | <a href="#">RT</a> |          | 5     | 1.3E-1  | 9.6E-1    |
| <input type="checkbox"/> | SMART              | <a href="#">PSI</a>                                                                            | <a href="#">RT</a> |          | 4     | 5.2E-1  | 9.9E-1    |
| <input type="checkbox"/> | SMART              | <a href="#">Sema</a>                                                                           | <a href="#">RT</a> |          | 3     | 6.0E-1  | 1.0E0     |
| <input type="checkbox"/> | INTERPRO           | <a href="#">Plexin-like fold</a>                                                               | <a href="#">RT</a> |          | 4     | 6.7E-1  | 1.0E0     |
| <input type="checkbox"/> | INTERPRO           | <a href="#">Semaphorin/CD100 antigen</a>                                                       | <a href="#">RT</a> |          | 3     | 6.9E-1  | 1.0E0     |
| <input type="checkbox"/> | UP_KEYWORDS        | Annotation Cluster 145                                                                         | 0.41               | <b>G</b> |       |         |           |
|                          |                    | <a href="#">Immunoglobulin domain</a>                                                          | <a href="#">RT</a> |          | 19    | 5.4E-2  | 1.3E-1    |
| <input type="checkbox"/> | UP_SEQ_FEATURE     | domain:Ig-like V-type 2                                                                        | <a href="#">RT</a> |          | 5     | 7.1E-2  | 9.9E-1    |
| <input type="checkbox"/> | UP_SEQ_FEATURE     | domain:Ig-like C2-type 1                                                                       | <a href="#">RT</a> |          | 9     | 8.0E-2  | 1.0E0     |
| <input type="checkbox"/> | UP_SEQ_FEATURE     | domain:Ig-like C2-type 2                                                                       | <a href="#">RT</a> |          | 9     | 1.0E-1  | 1.0E0     |
| <input type="checkbox"/> | UP_SEQ_FEATURE     | domain:Ig-like V-type 1                                                                        | <a href="#">RT</a> |          | 5     | 1.1E-1  | 1.0E0     |
| <input type="checkbox"/> | UP_SEQ_FEATURE     | domain:Ig-like C2-type 3                                                                       | <a href="#">RT</a> |          | 4     | 4.9E-1  | 1.0E0     |
| <input type="checkbox"/> | INTERPRO           | <a href="#">CD80-like, immunoglobulin C2-set</a>                                               | <a href="#">RT</a> |          | 3     | 6.7E-1  | 1.0E0     |
| <input type="checkbox"/> | GOTERM_BP_DIRECT   | <a href="#">heterophilic cell-cell adhesion via plasma membrane cell adhesion molecules</a>    | <a href="#">RT</a> |          | 3     | 8.8E-1  | 1.0E0     |
| <input type="checkbox"/> | SMART              | <a href="#">IGc2</a>                                                                           | <a href="#">RT</a> |          | 10    | 9.0E-1  | 1.0E0     |
| <input type="checkbox"/> | INTERPRO           | <a href="#">Immunoglobulin subtype 2</a>                                                       | <a href="#">RT</a> |          | 10    | 9.7E-1  | 1.0E0     |
| <input type="checkbox"/> | INTERPRO           | <a href="#">Immunoglobulin V-set</a>                                                           | <a href="#">RT</a> |          | 6     | 9.9E-1  | 1.0E0     |
| <input type="checkbox"/> | SMART              | <a href="#">IG</a>                                                                             | <a href="#">RT</a> |          | 14    | 9.9E-1  | 1.0E0     |
| <input type="checkbox"/> | INTERPRO           | <a href="#">Immunoglobulin subtype</a>                                                         | <a href="#">RT</a> |          | 14    | 1.0E0   | 1.0E0     |
| <input type="checkbox"/> | INTERPRO           | <a href="#">Immunoglobulin-like domain</a>                                                     | <a href="#">RT</a> |          | 20    | 1.0E0   | 1.0E0     |
| <input type="checkbox"/> | INTERPRO           | <a href="#">Immunoglobulin-like fold</a>                                                       | <a href="#">RT</a> |          | 25    | 1.0E0   | 1.0E0     |
| <input type="checkbox"/> | GOTERM_BP_DIRECT   | Annotation Cluster 146                                                                         | 0.4                | <b>G</b> |       |         |           |
|                          |                    | <a href="#">positive regulation of GTPase activity</a>                                         | <a href="#">RT</a> |          | 17    | 2.3E-1  | 9.9E-1    |
| <input type="checkbox"/> | UP_KEYWORDS        | <a href="#">GTPase activation</a>                                                              | <a href="#">RT</a> |          | 7     | 2.8E-1  | 5.0E-1    |
| <input type="checkbox"/> | GOTERM_MF_DIRECT   | <a href="#">GTPase activator activity</a>                                                      | <a href="#">RT</a> |          | 8     | 1.0E0   | 1.0E0     |
| <input type="checkbox"/> | GOTERM_BP_DIRECT   | Annotation Cluster 147                                                                         | 0.39               | <b>G</b> |       |         |           |
|                          |                    | <a href="#">regulation of proteasomal ubiquitin-dependent protein catabolic process</a>        | <a href="#">RT</a> |          | 4     | 8.8E-2  | 9.1E-1    |
| <input type="checkbox"/> | SMART              | <a href="#">UBA</a>                                                                            | <a href="#">RT</a> |          | 3     | 5.8E-1  | 9.9E-1    |
| <input type="checkbox"/> | INTERPRO           | <a href="#">UBA-like</a>                                                                       | <a href="#">RT</a> |          | 5     | 6.4E-1  | 1.0E0     |
| <input type="checkbox"/> | INTERPRO           | <a href="#">Ubiquitin-associated/translation elongation factor EF1B, N-terminal, eukaryote</a> | <a href="#">RT</a> |          | 3     | 8.6E-1  | 1.0E0     |
| <input type="checkbox"/> | UP_KEYWORDS        | Annotation Cluster 148                                                                         | 0.37               | <b>G</b> |       |         |           |
|                          |                    | <a href="#">Peroxisome</a>                                                                     | <a href="#">RT</a> |          | 6     | 2.3E-1  | 4.4E-1    |
| <input type="checkbox"/> | GOTERM_CC_DIRECT   | <a href="#">peroxisome</a>                                                                     | <a href="#">RT</a> |          | 8     | 3.1E-1  | 8.0E-1    |
| <input type="checkbox"/> | KEGG_PATHWAY       | <a href="#">Peroxisome</a>                                                                     | <a href="#">RT</a> |          | 9     | 6.3E-1  | 8.7E-1    |
| <input type="checkbox"/> | UP_SEQ_FEATURE     | short sequence motif:Microbody targeting signal                                                | <a href="#">RT</a> |          | 4     | 7.0E-1  | 1.0E0     |
| <input type="checkbox"/> | SMART              | Annotation Cluster 149                                                                         | 0.34               | <b>G</b> |       |         |           |
|                          |                    | <a href="#">FA58C</a>                                                                          | <a href="#">RT</a> |          | 3     | 3.5E-1  | 9.7E-1    |
| <input type="checkbox"/> | INTERPRO           | <a href="#">Coagulation factor 5/8 C-terminal type domain</a>                                  | <a href="#">RT</a> |          | 3     | 4.9E-1  | 1.0E0     |
| <input type="checkbox"/> | INTERPRO           | <a href="#">Galactose-binding domain-like</a>                                                  | <a href="#">RT</a> |          | 7     | 5.4E-1  | 1.0E0     |
| <input type="checkbox"/> | UP_KEYWORDS        | Annotation Cluster 150                                                                         | 0.34               | <b>G</b> |       |         |           |
|                          |                    | <a href="#">DNA repair</a>                                                                     | <a href="#">RT</a> |          | 13    | 2.6E-1  | 4.7E-1    |
| <input type="checkbox"/> | UP_KEYWORDS        | <a href="#">DNA damage</a>                                                                     | <a href="#">RT</a> |          | 13    | 3.8E-1  | 6.1E-1    |
| <input type="checkbox"/> | GOTERM_BP_DIRECT   | <a href="#">DNA repair</a>                                                                     | <a href="#">RT</a> |          | 5     | 9.9E-1  | 1.0E0     |
| <input type="checkbox"/> | SMART              | Annotation Cluster 151                                                                         | 0.33               | <b>G</b> |       |         |           |
|                          |                    | <a href="#">KU</a>                                                                             | <a href="#">RT</a> |          | 3     | 4.0E-1  | 9.8E-1    |
| <input type="checkbox"/> | INTERPRO           | <a href="#">Proteinase inhibitor I2, Kunitz, conserved site</a>                                | <a href="#">RT</a> |          | 3     | 4.9E-1  | 1.0E0     |
| <input type="checkbox"/> | INTERPRO           | <a href="#">Proteinase inhibitor I2, Kunitz metazoa</a>                                        | <a href="#">RT</a> |          | 3     | 5.1E-1  | 1.0E0     |
| <input type="checkbox"/> | UP_KEYWORDS        | Annotation Cluster 152                                                                         | 0.32               | <b>G</b> |       |         |           |
|                          |                    |                                                                                                |                    |          | Count | P_Value | Benjamini |

|                          | Annotation Cluster     | Enrichment Score                              |    |  | Count | P_Value | Benjamini |
|--------------------------|------------------------|-----------------------------------------------|----|--|-------|---------|-----------|
| <input type="checkbox"/> | INTERPRO               | HAD-like domain                               | RT |  | 9     | 2.8E-1  | 1.0E0     |
| <input type="checkbox"/> | SMART                  | SM00831                                       | RT |  | 3     | 3.0E-1  | 9.5E-1    |
| <input type="checkbox"/> | INTERPRO               | Cation-transporting P-type ATPase, C-terminal | RT |  | 3     | 3.1E-1  | 1.0E0     |
| <input type="checkbox"/> | INTERPRO               | P-type ATPase, transmembrane domain           | RT |  | 3     | 3.4E-1  | 1.0E0     |
| <input type="checkbox"/> | INTERPRO               | Cation-transporting P-type ATPase, N-terminal | RT |  | 3     | 4.0E-1  | 1.0E0     |
| <input type="checkbox"/> | GOTERM_CC_DIRECT       | T-tubule                                      | RT |  | 3     | 4.4E-1  | 9.0E-1    |
| <input type="checkbox"/> | INTERPRO               | P-type ATPase, phosphorylation site           | RT |  | 3     | 7.6E-1  | 1.0E0     |
| <input type="checkbox"/> | INTERPRO               | P-type ATPase, cytoplasmic domain N           | RT |  | 3     | 7.6E-1  | 1.0E0     |
| <input type="checkbox"/> | INTERPRO               | Cation-transporting P-type ATPase             | RT |  | 3     | 7.9E-1  | 1.0E0     |
| <input type="checkbox"/> | INTERPRO               | P-type ATPase, A domain                       | RT |  | 3     | 7.9E-1  | 1.0E0     |
|                          | Annotation Cluster 153 | Enrichment Score: 0.31                        | G  |  | Count | P_Value | Benjamini |
| <input type="checkbox"/> | UP_KEYWORDS            | Vision                                        | RT |  | 6     | 2.3E-1  | 4.4E-1    |
| <input type="checkbox"/> | GOTERM_CC_DIRECT       | photoreceptor inner segment                   | RT |  | 4     | 3.5E-1  | 8.4E-1    |
| <input type="checkbox"/> | GOTERM_BP_DIRECT       | visual perception                             | RT |  | 9     | 7.2E-1  | 1.0E0     |
| <input type="checkbox"/> | UP_KEYWORDS            | Sensory transduction                          | RT |  | 6     | 1.0E0   | 1.0E0     |
|                          | Annotation Cluster 154 | Enrichment Score: 0.29                        | G  |  | Count | P_Value | Benjamini |
| <input type="checkbox"/> | INTERPRO               | Tetraspanin, conserved site                   | RT |  | 4     | 2.2E-1  | 9.9E-1    |
| <input type="checkbox"/> | INTERPRO               | Tetraspanin                                   | RT |  | 4     | 4.6E-1  | 1.0E0     |
| <input type="checkbox"/> | INTERPRO               | Tetraspanin, EC2 domain                       | RT |  | 4     | 4.6E-1  | 1.0E0     |
| <input type="checkbox"/> | INTERPRO               | Tetraspanin/Peripherin                        | RT |  | 4     | 5.0E-1  | 1.0E0     |
| <input type="checkbox"/> | PIR_SUPERFAMILY        | tetraspanin                                   | RT |  | 4     | 8.2E-1  | 1.0E0     |
| <input type="checkbox"/> | GOTERM_BP_DIRECT       | cell surface receptor signaling pathway       | RT |  | 7     | 1.0E0   | 1.0E0     |
|                          | Annotation Cluster 155 | Enrichment Score: 0.28                        | G  |  | Count | P_Value | Benjamini |
| <input type="checkbox"/> | UP_SEQ_FEATURE         | domain:PDZ                                    | RT |  | 6     | 4.4E-1  | 1.0E0     |
| <input type="checkbox"/> | SMART                  | PDZ                                           | RT |  | 10    | 5.2E-1  | 9.9E-1    |
| <input type="checkbox"/> | INTERPRO               | PDZ domain                                    | RT |  | 11    | 6.6E-1  | 1.0E0     |
|                          | Annotation Cluster 156 | Enrichment Score: 0.26                        | G  |  | Count | P_Value | Benjamini |
| <input type="checkbox"/> | UP_KEYWORDS            | Wnt signaling pathway                         | RT |  | 11    | 5.6E-2  | 1.3E-1    |
| <input type="checkbox"/> | KEGG_PATHWAY           | Hedgehog signaling pathway                    | RT |  | 6     | 1.0E-1  | 3.7E-1    |
| <input type="checkbox"/> | UP_SEQ_FEATURE         | binding site:ATP                              | RT |  | 29    | 3.1E-1  | 1.0E0     |
| <input type="checkbox"/> | UP_KEYWORDS            | Kinase                                        | RT |  | 39    | 3.6E-1  | 6.0E-1    |
| <input type="checkbox"/> | GOTERM_BP_DIRECT       | protein phosphorylation                       | RT |  | 14    | 4.8E-1  | 1.0E0     |
| <input type="checkbox"/> | GOTERM_BP_DIRECT       | peptidyl-serine phosphorylation               | RT |  | 8     | 8.9E-1  | 1.0E0     |
| <input type="checkbox"/> | UP_KEYWORDS            | Serine/threonine-protein kinase               | RT |  | 13    | 9.2E-1  | 9.9E-1    |
| <input type="checkbox"/> | UP_SEQ_FEATURE         | domain:Protein kinase                         | RT |  | 16    | 9.2E-1  | 1.0E0     |
| <input type="checkbox"/> | GOTERM_MF_DIRECT       | protein serine/threonine kinase activity      | RT |  | 13    | 9.8E-1  | 1.0E0     |
| <input type="checkbox"/> | SMART                  | S_TKc                                         | RT |  | 15    | 9.9E-1  | 1.0E0     |
| <input type="checkbox"/> | INTERPRO               | Serine/threonine-protein kinase, active site  | RT |  | 13    | 1.0E0   | 1.0E0     |
| <input type="checkbox"/> | INTERPRO               | Protein kinase, ATP binding site              | RT |  | 14    | 1.0E0   | 1.0E0     |
| <input type="checkbox"/> | INTERPRO               | Protein kinase, catalytic domain              | RT |  | 17    | 1.0E0   | 1.0E0     |
| <input type="checkbox"/> | INTERPRO               | Protein kinase-like domain                    | RT |  | 17    | 1.0E0   | 1.0E0     |
|                          | Annotation Cluster 157 | Enrichment Score: 0.26                        | G  |  | Count | P_Value | Benjamini |
| <input type="checkbox"/> | UP_SEQ_FEATURE         | repeat:1-1                                    | RT |  | 4     | 4.3E-1  | 1.0E0     |
| <input type="checkbox"/> | UP_SEQ_FEATURE         | repeat:2-3                                    | RT |  | 3     | 4.6E-1  | 1.0E0     |
| <input type="checkbox"/> | UP_SEQ_FEATURE         | repeat:1-2                                    | RT |  | 4     | 4.9E-1  | 1.0E0     |
| <input type="checkbox"/> | UP_SEQ_FEATURE         | repeat:2-2                                    | RT |  | 3     | 7.2E-1  | 1.0E0     |
| <input type="checkbox"/> | UP_SEQ_FEATURE         | repeat:2-1                                    | RT |  | 3     | 7.2E-1  | 1.0E0     |
|                          | Annotation Cluster 158 | Enrichment Score: 0.25                        | G  |  | Count | P_Value | Benjamini |
| <input type="checkbox"/> | SMART                  | H2B                                           | RT |  | 4     | 5.1E-1  | 9.9E-1    |
| <input type="checkbox"/> | GOTERM_CC_DIRECT       | nuclear nucleosome                            | RT |  | 5     | 5.4E-1  | 9.4E-1    |
| <input type="checkbox"/> | GOTERM_BP_DIRECT       | nucleosome assembly                           | RT |  | 11    | 5.7E-1  | 1.0E0     |
| <input type="checkbox"/> | INTERPRO               | Histone H2B                                   | RT |  | 4     | 6.2E-1  | 1.0E0     |
|                          | Annotation Cluster 159 | Enrichment Score: 0.24                        | G  |  | Count | P_Value | Benjamini |

| Annotation Cluster 1     |                  | Enrichment Score: 57.69                                                           | <b>G</b>           |     | Count | P_Value | Benjamini |
|--------------------------|------------------|-----------------------------------------------------------------------------------|--------------------|---------------------------------------------------------------------------------------|-------|---------|-----------|
| <input type="checkbox"/> | SMART            | <a href="#">SM01055</a>                                                           | <a href="#">RT</a> |      | 3     | 1.0E-1  | 6.8E-1    |
| <input type="checkbox"/> | INTERPRO         | <a href="#">Cadherin_prodomain</a>                                                | <a href="#">RT</a> |      | 3     | 1.3E-1  | 9.4E-1    |
| <input type="checkbox"/> | UP_SEQ_FEATURE   | domain:Cadherin 2                                                                 | <a href="#">RT</a> |      | 4     | 5.5E-1  | 1.0E0     |
| <input type="checkbox"/> | UP_SEQ_FEATURE   | domain:Cadherin 1                                                                 | <a href="#">RT</a> |      | 4     | 5.5E-1  | 1.0E0     |
| <input type="checkbox"/> | UP_SEQ_FEATURE   | domain:Cadherin 5                                                                 | <a href="#">RT</a> |      | 3     | 7.7E-1  | 1.0E0     |
| <input type="checkbox"/> | UP_SEQ_FEATURE   | domain:Cadherin 4                                                                 | <a href="#">RT</a> |      | 3     | 8.0E-1  | 1.0E0     |
| <input type="checkbox"/> | UP_SEQ_FEATURE   | domain:Cadherin 3                                                                 | <a href="#">RT</a> |      | 3     | 8.0E-1  | 1.0E0     |
| <input type="checkbox"/> | INTERPRO         | <a href="#">Cadherin-like</a>                                                     | <a href="#">RT</a> |      | 5     | 8.8E-1  | 1.0E0     |
| <input type="checkbox"/> | SMART            | <a href="#">CA</a>                                                                | <a href="#">RT</a> |      | 4     | 8.9E-1  | 1.0E0     |
| <input type="checkbox"/> | INTERPRO         | <a href="#">Cadherin</a>                                                          | <a href="#">RT</a> |      | 4     | 9.4E-1  | 1.0E0     |
| <input type="checkbox"/> | INTERPRO         | <a href="#">Cadherin_conserved_site</a>                                           | <a href="#">RT</a> |      | 3     | 9.8E-1  | 1.0E0     |
| <input type="checkbox"/> | GOTERM_BP_DIRECT | <a href="#">homophilic_cell_adhesion_via_plasma_membrane_adhesion_molecules</a>   | <a href="#">RT</a> |      | 5     | 9.8E-1  | 1.0E0     |
| Annotation Cluster 160   |                  | Enrichment Score: 0.23                                                            | <b>G</b>           |    | Count | P_Value | Benjamini |
| <input type="checkbox"/> | UP_SEQ_FEATURE   | repeat:HEAT 4                                                                     | <a href="#">RT</a> |      | 3     | 5.4E-1  | 1.0E0     |
| <input type="checkbox"/> | UP_SEQ_FEATURE   | repeat:HEAT 1                                                                     | <a href="#">RT</a> |      | 3     | 6.1E-1  | 1.0E0     |
| <input type="checkbox"/> | UP_SEQ_FEATURE   | repeat:HEAT 3                                                                     | <a href="#">RT</a> |      | 3     | 6.1E-1  | 1.0E0     |
| <input type="checkbox"/> | UP_SEQ_FEATURE   | repeat:HEAT 2                                                                     | <a href="#">RT</a> |      | 3     | 6.1E-1  | 1.0E0     |
| Annotation Cluster 161   |                  | Enrichment Score: 0.22                                                            | <b>G</b>           |    | Count | P_Value | Benjamini |
| <input type="checkbox"/> | SMART            | <a href="#">FBG</a>                                                               | <a href="#">RT</a> |      | 3     | 4.3E-1  | 9.8E-1    |
| <input type="checkbox"/> | INTERPRO         | <a href="#">Fibrinogen_alpha/beta/gamma_chain_C-terminal_globular_subdomain_2</a> | <a href="#">RT</a> |      | 3     | 5.1E-1  | 1.0E0     |
| <input type="checkbox"/> | INTERPRO         | <a href="#">Fibrinogen_alpha/beta/gamma_chain_C-terminal_globular_subdomain_1</a> | <a href="#">RT</a> |      | 3     | 6.5E-1  | 1.0E0     |
| <input type="checkbox"/> | INTERPRO         | <a href="#">Fibrinogen_alpha/beta/gamma_chain_C-terminal_globular_domain</a>      | <a href="#">RT</a> |      | 3     | 6.9E-1  | 1.0E0     |
| <input type="checkbox"/> | UP_SEQ_FEATURE   | domain:Fibrinogen C-terminal                                                      | <a href="#">RT</a> |      | 3     | 7.7E-1  | 1.0E0     |
| Annotation Cluster 162   |                  | Enrichment Score: 0.22                                                            | <b>G</b>           |    | Count | P_Value | Benjamini |
| <input type="checkbox"/> | GOTERM_BP_DIRECT | <a href="#">positive_regulation_of_osteoblast_differentiation</a>                 | <a href="#">RT</a> |    | 6     | 3.9E-1  | 1.0E0     |
| <input type="checkbox"/> | GOTERM_BP_DIRECT | <a href="#">negative_regulation_of_extrinsic_apoptotic_signaling_pathway</a>      | <a href="#">RT</a> |    | 4     | 5.7E-1  | 1.0E0     |
| <input type="checkbox"/> | KEGG_PATHWAY     | <a href="#">Signaling_pathways_regulating_pluripotency_of_stem_cells</a>          | <a href="#">RT</a> |    | 3     | 1.0E0   | 1.0E0     |
| Annotation Cluster 163   |                  | Enrichment Score: 0.21                                                            | <b>G</b>           |  | Count | P_Value | Benjamini |
| <input type="checkbox"/> | GOTERM_BP_DIRECT | <a href="#">xenophagy</a>                                                         | <a href="#">RT</a> |    | 9     | 5.0E-1  | 1.0E0     |
| <input type="checkbox"/> | GOTERM_BP_DIRECT | <a href="#">positive_regulation_of_defense_response_to_virus_by_host</a>          | <a href="#">RT</a> |    | 10    | 5.1E-1  | 1.0E0     |
| <input type="checkbox"/> | GOTERM_BP_DIRECT | <a href="#">mitophagy_in_response_to_mitochondrial_depolarization</a>             | <a href="#">RT</a> |    | 8     | 8.9E-1  | 1.0E0     |
| Annotation Cluster 164   |                  | Enrichment Score: 0.2                                                             | <b>G</b>           |  | Count | P_Value | Benjamini |
| <input type="checkbox"/> | INTERPRO         | <a href="#">Low-density_lipoprotein_(LDL)_receptor_class_A_repeat</a>             | <a href="#">RT</a> |    | 5     | 5.2E-1  | 1.0E0     |
| <input type="checkbox"/> | SMART            | <a href="#">LDLa</a>                                                              | <a href="#">RT</a> |    | 4     | 5.7E-1  | 9.9E-1    |
| <input type="checkbox"/> | INTERPRO         | <a href="#">Low-density_lipoprotein_(LDL)_receptor_class_A_conserved_site</a>     | <a href="#">RT</a> |    | 4     | 5.8E-1  | 1.0E0     |
| <input type="checkbox"/> | INTERPRO         | <a href="#">Thrombospondin_type_1_repeat</a>                                      | <a href="#">RT</a> |    | 5     | 7.2E-1  | 1.0E0     |
| <input type="checkbox"/> | SMART            | <a href="#">TSP1</a>                                                              | <a href="#">RT</a> |    | 4     | 7.7E-1  | 1.0E0     |
| Annotation Cluster 165   |                  | Enrichment Score: 0.2                                                             | <b>G</b>           |  | Count | P_Value | Benjamini |
| <input type="checkbox"/> | SMART            | <a href="#">ARM</a>                                                               | <a href="#">RT</a> |    | 4     | 5.4E-1  | 9.9E-1    |
| <input type="checkbox"/> | UP_SEQ_FEATURE   | repeat:ARM 2                                                                      | <a href="#">RT</a> |    | 3     | 6.7E-1  | 1.0E0     |
| <input type="checkbox"/> | UP_SEQ_FEATURE   | repeat:ARM 3                                                                      | <a href="#">RT</a> |    | 3     | 6.7E-1  | 1.0E0     |
| <input type="checkbox"/> | INTERPRO         | <a href="#">Armadillo</a>                                                         | <a href="#">RT</a> |    | 4     | 6.9E-1  | 1.0E0     |
| Annotation Cluster 166   |                  | Enrichment Score: 0.18                                                            | <b>G</b>           |  | Count | P_Value | Benjamini |
| <input type="checkbox"/> | UP_KEYWORDS      | <a href="#">TPR_repeat</a>                                                        | <a href="#">RT</a> |    | 8     | 1.2E-1  | 2.6E-1    |
| <input type="checkbox"/> | INTERPRO         | <a href="#">Tetratricopeptide_TPR-1</a>                                           | <a href="#">RT</a> |    | 3     | 4.9E-1  | 1.0E0     |
| <input type="checkbox"/> | INTERPRO         | <a href="#">Tetratricopeptide-like_helical</a>                                    | <a href="#">RT</a> |    | 16    | 5.9E-1  | 1.0E0     |
| <input type="checkbox"/> | UP_SEQ_FEATURE   | repeat:TPR 3                                                                      | <a href="#">RT</a> |    | 7     | 7.1E-1  | 1.0E0     |
| <input type="checkbox"/> | SMART            | <a href="#">TPR</a>                                                               | <a href="#">RT</a> |    | 7     | 8.0E-1  | 1.0E0     |
| <input type="checkbox"/> | UP_SEQ_FEATURE   | repeat:TPR 1                                                                      | <a href="#">RT</a> |    | 7     | 8.6E-1  | 1.0E0     |
| <input type="checkbox"/> | UP_SEQ_FEATURE   | repeat:TPR 2                                                                      | <a href="#">RT</a> |    | 7     | 8.6E-1  | 1.0E0     |
| <input type="checkbox"/> | UP_SEQ_FEATURE   | repeat:TPR 5                                                                      | <a href="#">RT</a> |    | 3     | 8.9E-1  | 1.0E0     |

|                          | Annotation Cluster | Enrichment Score                                                                       |                    |          | Count | P_Value | Benjamini |
|--------------------------|--------------------|----------------------------------------------------------------------------------------|--------------------|----------|-------|---------|-----------|
| <input type="checkbox"/> | UP_SEQ_FEATURE     | Annotation Cluster 1                                                                   | 57.69              | <b>G</b> |       |         |           |
| <input type="checkbox"/> | INTERPRO           | repeat:TPR 4                                                                           | <a href="#">RT</a> |          | 3     | 9.1E-1  | 1.0E0     |
| <input type="checkbox"/> | INTERPRO           | <a href="#">Tetratricopeptide repeat-containing domain</a>                             | <a href="#">RT</a> |          | 7     | 9.1E-1  | 1.0E0     |
| <input type="checkbox"/> | INTERPRO           | <a href="#">Tetratricopeptide repeat</a>                                               | <a href="#">RT</a> |          | 7     | 9.4E-1  | 1.0E0     |
| <input type="checkbox"/> | SMART              | Annotation Cluster 167                                                                 | 0.18               | <b>G</b> |       |         |           |
| <input type="checkbox"/> | SMART              | <a href="#">TSPN</a>                                                                   | <a href="#">RT</a> |          | 3     | 3.5E-1  | 9.7E-1    |
| <input type="checkbox"/> | SMART              | <a href="#">LamG</a>                                                                   | <a href="#">RT</a> |          | 3     | 7.2E-1  | 1.0E0     |
| <input type="checkbox"/> | INTERPRO           | <a href="#">Laminin G domain</a>                                                       | <a href="#">RT</a> |          | 4     | 7.7E-1  | 1.0E0     |
| <input type="checkbox"/> | INTERPRO           | <a href="#">Concanavalin A-like lectin/glucanase, subgroup</a>                         | <a href="#">RT</a> |          | 9     | 9.9E-1  | 1.0E0     |
| <input type="checkbox"/> | UP_SEQ_FEATURE     | Annotation Cluster 168                                                                 | 0.17               | <b>G</b> |       |         |           |
| <input type="checkbox"/> | UP_SEQ_FEATURE     | domain:Fibronectin type-III 3                                                          | <a href="#">RT</a> |          | 3     | 4.6E-1  | 1.0E0     |
| <input type="checkbox"/> | UP_SEQ_FEATURE     | domain:Fibronectin type-III 2                                                          | <a href="#">RT</a> |          | 4     | 5.5E-1  | 1.0E0     |
| <input type="checkbox"/> | UP_SEQ_FEATURE     | domain:Fibronectin type-III 1                                                          | <a href="#">RT</a> |          | 4     | 5.5E-1  | 1.0E0     |
| <input type="checkbox"/> | SMART              | <a href="#">FN3</a>                                                                    | <a href="#">RT</a> |          | 5     | 9.9E-1  | 1.0E0     |
| <input type="checkbox"/> | INTERPRO           | <a href="#">Fibronectin, type III</a>                                                  | <a href="#">RT</a> |          | 6     | 1.0E0   | 1.0E0     |
| <input type="checkbox"/> | UP_SEQ_FEATURE     | Annotation Cluster 169                                                                 | 0.14               | <b>G</b> |       |         |           |
| <input type="checkbox"/> | SMART              | domain:Ig-like C1-type                                                                 | <a href="#">RT</a> |          | 3     | 3.8E-1  | 1.0E0     |
| <input type="checkbox"/> | SMART              | <a href="#">IGc1</a>                                                                   | <a href="#">RT</a> |          | 4     | 8.3E-1  | 1.0E0     |
| <input type="checkbox"/> | INTERPRO           | <a href="#">Immunoglobulin C1-set</a>                                                  | <a href="#">RT</a> |          | 4     | 9.1E-1  | 1.0E0     |
| <input type="checkbox"/> | INTERPRO           | <a href="#">Immunoglobulin/major histocompatibility complex, conserved site</a>        | <a href="#">RT</a> |          | 3     | 9.3E-1  | 1.0E0     |
| <input type="checkbox"/> | INTERPRO           | Annotation Cluster 170                                                                 | 0.13               | <b>G</b> |       |         |           |
| <input type="checkbox"/> | SMART              | <a href="#">Transforming growth factor-beta, N-terminal</a>                            | <a href="#">RT</a> |          | 3     | 5.1E-1  | 1.0E0     |
| <input type="checkbox"/> | GOTERM_BP_DIRECT   | <a href="#">positive regulation of pathway-restricted SMAD protein phosphorylation</a> | <a href="#">RT</a> |          | 5     | 5.6E-1  | 1.0E0     |
| <input type="checkbox"/> | SMART              | <a href="#">TGFB</a>                                                                   | <a href="#">RT</a> |          | 3     | 6.9E-1  | 1.0E0     |
| <input type="checkbox"/> | INTERPRO           | <a href="#">Transforming growth factor-beta-related</a>                                | <a href="#">RT</a> |          | 3     | 7.3E-1  | 1.0E0     |
| <input type="checkbox"/> | INTERPRO           | <a href="#">Transforming growth factor beta, conserved site</a>                        | <a href="#">RT</a> |          | 3     | 7.3E-1  | 1.0E0     |
| <input type="checkbox"/> | GOTERM_BP_DIRECT   | <a href="#">SMAD protein signal transduction</a>                                       | <a href="#">RT</a> |          | 5     | 7.8E-1  | 1.0E0     |
| <input type="checkbox"/> | GOTERM_MF_DIRECT   | <a href="#">transforming growth factor beta receptor binding</a>                       | <a href="#">RT</a> |          | 3     | 7.8E-1  | 1.0E0     |
| <input type="checkbox"/> | INTERPRO           | <a href="#">Transforming growth factor-beta, C-terminal</a>                            | <a href="#">RT</a> |          | 3     | 8.0E-1  | 1.0E0     |
| <input type="checkbox"/> | GOTERM_MF_DIRECT   | <a href="#">cytokine activity</a>                                                      | <a href="#">RT</a> |          | 9     | 9.0E-1  | 1.0E0     |
| <input type="checkbox"/> | GOTERM_BP_DIRECT   | <a href="#">regulation of MAPK cascade</a>                                             | <a href="#">RT</a> |          | 3     | 9.2E-1  | 1.0E0     |
| <input type="checkbox"/> | GOTERM_BP_DIRECT   | <a href="#">cell development</a>                                                       | <a href="#">RT</a> |          | 3     | 9.4E-1  | 1.0E0     |
| <input type="checkbox"/> | GOTERM_CC_DIRECT   | Annotation Cluster 171                                                                 | 0.12               | <b>G</b> |       |         |           |
| <input type="checkbox"/> | GOTERM_MF_DIRECT   | <a href="#">SNARE complex</a>                                                          | <a href="#">RT</a> |          | 6     | 3.9E-1  | 8.7E-1    |
| <input type="checkbox"/> | KEGG_PATHWAY       | <a href="#">SNAP receptor activity</a>                                                 | <a href="#">RT</a> |          | 3     | 8.5E-1  | 1.0E0     |
| <input type="checkbox"/> | UP_SEQ_FEATURE     | <a href="#">SNARE interactions in vesicular transport</a>                              | <a href="#">RT</a> |          | 3     | 8.8E-1  | 9.6E-1    |
| <input type="checkbox"/> | GOTERM_BP_DIRECT   | topological domain:Vesicular                                                           | <a href="#">RT</a> |          | 3     | 8.9E-1  | 1.0E0     |
| <input type="checkbox"/> | GOTERM_BP_DIRECT   | <a href="#">vesicle fusion</a>                                                         | <a href="#">RT</a> |          | 3     | 9.5E-1  | 1.0E0     |
| <input type="checkbox"/> | UP_SEQ_FEATURE     | Annotation Cluster 172                                                                 | 0.09               | <b>G</b> |       |         |           |
| <input type="checkbox"/> | UP_SEQ_FEATURE     | metal ion-binding site:Calcium 2                                                       | <a href="#">RT</a> |          | 5     | 7.9E-1  | 1.0E0     |
| <input type="checkbox"/> | UP_SEQ_FEATURE     | metal ion-binding site:Calcium 1                                                       | <a href="#">RT</a> |          | 4     | 8.1E-1  | 1.0E0     |
| <input type="checkbox"/> | UP_SEQ_FEATURE     | metal ion-binding site:Calcium 2; via carbonyl oxygen                                  | <a href="#">RT</a> |          | 4     | 8.4E-1  | 1.0E0     |
| <input type="checkbox"/> | UP_KEYWORDS        | Annotation Cluster 173                                                                 | 0.07               | <b>G</b> |       |         |           |
| <input type="checkbox"/> | INTERPRO           | <a href="#">WD repeat</a>                                                              | <a href="#">RT</a> |          | 13    | 2.6E-1  | 4.8E-1    |
| <input type="checkbox"/> | UP_SEQ_FEATURE     | <a href="#">G-protein beta WD-40 repeat</a>                                            | <a href="#">RT</a> |          | 6     | 7.6E-1  | 1.0E0     |
| <input type="checkbox"/> | UP_SEQ_FEATURE     | repeat:WD 3                                                                            | <a href="#">RT</a> |          | 13    | 9.1E-1  | 1.0E0     |
| <input type="checkbox"/> | UP_SEQ_FEATURE     | repeat:WD 4                                                                            | <a href="#">RT</a> |          | 13    | 9.1E-1  | 1.0E0     |
| <input type="checkbox"/> | UP_SEQ_FEATURE     | repeat:WD 5                                                                            | <a href="#">RT</a> |          | 12    | 9.1E-1  | 1.0E0     |
| <input type="checkbox"/> | UP_SEQ_FEATURE     | repeat:WD 1                                                                            | <a href="#">RT</a> |          | 13    | 9.2E-1  | 1.0E0     |
| <input type="checkbox"/> | UP_SEQ_FEATURE     | repeat:WD 2                                                                            | <a href="#">RT</a> |          | 13    | 9.2E-1  | 1.0E0     |
| <input type="checkbox"/> | INTERPRO           | <a href="#">WD40 repeat, conserved site</a>                                            | <a href="#">RT</a> |          | 9     | 9.4E-1  | 1.0E0     |
| <input type="checkbox"/> | UP_SEQ_FEATURE     | repeat:WD 7                                                                            | <a href="#">RT</a> |          | 6     | 9.4E-1  | 1.0E0     |
| <input type="checkbox"/> | SMART              | <a href="#">WD40</a>                                                                   | <a href="#">RT</a> |          | 12    | 9.5E-1  | 1.0E0     |

|                          | Annotation Cluster | Enrichment Score                                          |                    |          | Count | P_Value | Benjamini |
|--------------------------|--------------------|-----------------------------------------------------------|--------------------|----------|-------|---------|-----------|
| <input type="checkbox"/> | UP_SEQ_FEATURE     | Annotation Cluster 1                                      | 57.69              | <b>G</b> |       |         |           |
| <input type="checkbox"/> | UP_SEQ_FEATURE     | repeat:WD 6                                               | <a href="#">RT</a> |          | 8     | 9.6E-1  | 1.0E0     |
| <input type="checkbox"/> | INTERPRO           | <a href="#">WD40/YVTN repeat-like-containing_domain</a>   | <a href="#">RT</a> |          | 18    | 9.6E-1  | 1.0E0     |
| <input type="checkbox"/> | INTERPRO           | <a href="#">WD40 repeat</a>                               | <a href="#">RT</a> |          | 12    | 9.9E-1  | 1.0E0     |
| <input type="checkbox"/> | INTERPRO           | <a href="#">WD40-repeat-containing_domain</a>             | <a href="#">RT</a> |          | 12    | 1.0E0   | 1.0E0     |
| <input type="checkbox"/> | UP_SEQ_FEATURE     | Annotation Cluster 174                                    | 0.06               | <b>G</b> |       |         |           |
| <input type="checkbox"/> | UP_SEQ_FEATURE     | region of interest:S-adenosyl-L-methionine binding        | <a href="#">RT</a> |          | 3     | 7.2E-1  | 1.0E0     |
| <input type="checkbox"/> | UP_SEQ_FEATURE     | binding site:S-adenosyl-L-methionine                      | <a href="#">RT</a> |          | 3     | 8.9E-1  | 1.0E0     |
| <input type="checkbox"/> | UP_KEYWORDS        | <a href="#">Methyltransferase</a>                         | <a href="#">RT</a> |          | 6     | 9.2E-1  | 9.9E-1    |
| <input type="checkbox"/> | UP_KEYWORDS        | <a href="#">S-adenosyl-L-methionine</a>                   | <a href="#">RT</a> |          | 5     | 9.5E-1  | 1.0E0     |
| <input type="checkbox"/> | UP_KEYWORDS        | Annotation Cluster 175                                    | 0.05               | <b>G</b> |       |         |           |
| <input type="checkbox"/> | UP_KEYWORDS        | <a href="#">Leucine-rich repeat</a>                       | <a href="#">RT</a> |          | 13    | 6.3E-1  | 8.4E-1    |
| <input type="checkbox"/> | UP_SEQ_FEATURE     | repeat:LRR 2                                              | <a href="#">RT</a> |          | 13    | 8.2E-1  | 1.0E0     |
| <input type="checkbox"/> | UP_SEQ_FEATURE     | repeat:LRR 1                                              | <a href="#">RT</a> |          | 13    | 8.2E-1  | 1.0E0     |
| <input type="checkbox"/> | UP_SEQ_FEATURE     | repeat:LRR 3                                              | <a href="#">RT</a> |          | 12    | 8.4E-1  | 1.0E0     |
| <input type="checkbox"/> | UP_SEQ_FEATURE     | repeat:LRR 4                                              | <a href="#">RT</a> |          | 10    | 8.8E-1  | 1.0E0     |
| <input type="checkbox"/> | UP_SEQ_FEATURE     | repeat:LRR 5                                              | <a href="#">RT</a> |          | 9     | 8.9E-1  | 1.0E0     |
| <input type="checkbox"/> | UP_SEQ_FEATURE     | repeat:LRR 7                                              | <a href="#">RT</a> |          | 7     | 8.9E-1  | 1.0E0     |
| <input type="checkbox"/> | UP_SEQ_FEATURE     | repeat:LRR 6                                              | <a href="#">RT</a> |          | 8     | 9.1E-1  | 1.0E0     |
| <input type="checkbox"/> | UP_SEQ_FEATURE     | repeat:LRR 9                                              | <a href="#">RT</a> |          | 4     | 9.7E-1  | 1.0E0     |
| <input type="checkbox"/> | UP_SEQ_FEATURE     | repeat:LRR 8                                              | <a href="#">RT</a> |          | 4     | 9.8E-1  | 1.0E0     |
| <input type="checkbox"/> | UP_SEQ_FEATURE     | repeat:LRR 10                                             | <a href="#">RT</a> |          | 3     | 9.9E-1  | 1.0E0     |
| <input type="checkbox"/> | INTERPRO           | <a href="#">Leucine-rich repeat</a>                       | <a href="#">RT</a> |          | 10    | 1.0E0   | 1.0E0     |
| <input type="checkbox"/> | SMART              | <a href="#">LRR_TYP</a>                                   | <a href="#">RT</a> |          | 4     | 1.0E0   | 1.0E0     |
| <input type="checkbox"/> | INTERPRO           | <a href="#">Leucine-rich repeat, typical subtype</a>      | <a href="#">RT</a> |          | 4     | 1.0E0   | 1.0E0     |
| <input type="checkbox"/> | KEGG_PATHWAY       | Annotation Cluster 176                                    | 0.05               | <b>G</b> |       |         |           |
| <input type="checkbox"/> | KEGG_PATHWAY       | <a href="#">VEGF signaling pathway</a>                    | <a href="#">RT</a> |          | 6     | 7.3E-1  | 9.1E-1    |
| <input type="checkbox"/> | KEGG_PATHWAY       | <a href="#">B cell receptor signaling pathway</a>         | <a href="#">RT</a> |          | 4     | 9.8E-1  | 1.0E0     |
| <input type="checkbox"/> | KEGG_PATHWAY       | <a href="#">Natural killer cell mediated cytotoxicity</a> | <a href="#">RT</a> |          | 4     | 1.0E0   | 1.0E0     |
| <input type="checkbox"/> | UP_KEYWORDS        | Annotation Cluster 177                                    | 0.02               | <b>G</b> |       |         |           |
| <input type="checkbox"/> | UP_KEYWORDS        | <a href="#">Membrane</a>                                  | <a href="#">RT</a> |          | 435   | 7.7E-1  | 9.4E-1    |
| <input type="checkbox"/> | UP_SEQ_FEATURE     | topological domain:Cytoplasmic                            | <a href="#">RT</a> |          | 118   | 1.0E0   | 1.0E0     |
| <input type="checkbox"/> | UP_SEQ_FEATURE     | transmembrane region                                      | <a href="#">RT</a> |          | 194   | 1.0E0   | 1.0E0     |
| <input type="checkbox"/> | UP_KEYWORDS        | <a href="#">Transmembrane helix</a>                       | <a href="#">RT</a> |          | 212   | 1.0E0   | 1.0E0     |
| <input type="checkbox"/> | GOTERM_CC_DIRECT   | <a href="#">integral component of membrane</a>            | <a href="#">RT</a> |          | 188   | 1.0E0   | 1.0E0     |
| <input type="checkbox"/> | UP_KEYWORDS        | <a href="#">Transmembrane</a>                             | <a href="#">RT</a> |          | 217   | 1.0E0   | 1.0E0     |
| <input type="checkbox"/> | SMART              | Annotation Cluster 178                                    | 0.01               | <b>G</b> |       |         |           |
| <input type="checkbox"/> | SMART              | <a href="#">LIM</a>                                       | <a href="#">RT</a> |          | 3     | 9.5E-1  | 1.0E0     |
| <input type="checkbox"/> | UP_KEYWORDS        | <a href="#">LIM domain</a>                                | <a href="#">RT</a> |          | 3     | 9.7E-1  | 1.0E0     |
| <input type="checkbox"/> | INTERPRO           | <a href="#">Zinc finger, LIM-type</a>                     | <a href="#">RT</a> |          | 3     | 9.8E-1  | 1.0E0     |
| <input type="checkbox"/> | UP_SEQ_FEATURE     | Annotation Cluster 179                                    | 0.01               | <b>G</b> |       |         |           |
| <input type="checkbox"/> | UP_SEQ_FEATURE     | domain:C2                                                 | <a href="#">RT</a> |          | 3     | 9.2E-1  | 1.0E0     |
| <input type="checkbox"/> | SMART              | <a href="#">C2</a>                                        | <a href="#">RT</a> |          | 3     | 1.0E0   | 1.0E0     |
| <input type="checkbox"/> | INTERPRO           | <a href="#">C2 calcium-dependent membrane targeting</a>   | <a href="#">RT</a> |          | 3     | 1.0E0   | 1.0E0     |
| <input type="checkbox"/> | UP_KEYWORDS        | Annotation Cluster 180                                    | 0.01               | <b>G</b> |       |         |           |
| <input type="checkbox"/> | UP_KEYWORDS        | <a href="#">Spliceosome</a>                               | <a href="#">RT</a> |          | 3     | 9.6E-1  | 1.0E0     |
| <input type="checkbox"/> | GOTERM_BP_DIRECT   | <a href="#">RNA splicing</a>                              | <a href="#">RT</a> |          | 3     | 9.8E-1  | 1.0E0     |
| <input type="checkbox"/> | GOTERM_BP_DIRECT   | <a href="#">mRNA processing</a>                           | <a href="#">RT</a> |          | 4     | 9.9E-1  | 1.0E0     |
| <input type="checkbox"/> | UP_KEYWORDS        | <a href="#">mRNA splicing</a>                             | <a href="#">RT</a> |          | 4     | 9.9E-1  | 1.0E0     |
| <input type="checkbox"/> | UP_KEYWORDS        | <a href="#">mRNA processing</a>                           | <a href="#">RT</a> |          | 4     | 1.0E0   | 1.0E0     |
| <input type="checkbox"/> | UP_SEQ_FEATURE     | Annotation Cluster 181                                    | 0                  | <b>G</b> |       |         |           |
| <input type="checkbox"/> | UP_SEQ_FEATURE     | domain:SH3                                                | <a href="#">RT</a> |          | 4     | 9.8E-1  | 1.0E0     |
| <input type="checkbox"/> | UP_KEYWORDS        | <a href="#">SH3 domain</a>                                | <a href="#">RT</a> |          | 4     | 1.0E0   | 1.0E0     |
| <input type="checkbox"/> | SMART              | <a href="#">SH3</a>                                       | <a href="#">RT</a> |          | 5     | 1.0E0   | 1.0E0     |
| <input type="checkbox"/> | INTERPRO           | <a href="#">Src homology-3 domain</a>                     | <a href="#">RT</a> |          | 5     | 1.0E0   | 1.0E0     |

| Annotation Cluster 1     |                  | Enrichment Score: 57.69                                    | <b>G</b>           |   | Count | P_Value | Benjamini |
|--------------------------|------------------|------------------------------------------------------------|--------------------|-------------------------------------------------------------------------------------|-------|---------|-----------|
| Annotation Cluster 182   |                  | Enrichment Score: 0                                        | <b>G</b>           |  | Count | P_Value | Benjamini |
| <input type="checkbox"/> | UP_SEQ_FEATURE   | repeat:ANK 4                                               | <a href="#">RT</a> |    | 3     | 9.9E-1  | 1.0E0     |
| <input type="checkbox"/> | UP_SEQ_FEATURE   | repeat:ANK 3                                               | <a href="#">RT</a> |    | 4     | 9.9E-1  | 1.0E0     |
| <input type="checkbox"/> | UP_SEQ_FEATURE   | repeat:ANK 1                                               | <a href="#">RT</a> |    | 4     | 1.0E0   | 1.0E0     |
| <input type="checkbox"/> | UP_SEQ_FEATURE   | repeat:ANK 2                                               | <a href="#">RT</a> |    | 4     | 1.0E0   | 1.0E0     |
| <input type="checkbox"/> | SMART            | <a href="#">ANK</a>                                        | <a href="#">RT</a> |    | 5     | 1.0E0   | 1.0E0     |
| <input type="checkbox"/> | UP_KEYWORDS      | <a href="#">ANK repeat</a>                                 | <a href="#">RT</a> |    | 5     | 1.0E0   | 1.0E0     |
| <input type="checkbox"/> | INTERPRO         | <a href="#">Ankyrin repeat</a>                             | <a href="#">RT</a> |    | 5     | 1.0E0   | 1.0E0     |
| <input type="checkbox"/> | INTERPRO         | <a href="#">Ankyrin repeat-containing domain</a>           | <a href="#">RT</a> |    | 5     | 1.0E0   | 1.0E0     |
| Annotation Cluster 183   |                  | Enrichment Score: 0                                        | <b>G</b>           |  | Count | P_Value | Benjamini |
| <input type="checkbox"/> | SMART            | <a href="#">RRM</a>                                        | <a href="#">RT</a> |    | 4     | 1.0E0   | 1.0E0     |
| <input type="checkbox"/> | INTERPRO         | <a href="#">RNA recognition motif domain</a>               | <a href="#">RT</a> |    | 4     | 1.0E0   | 1.0E0     |
| <input type="checkbox"/> | INTERPRO         | <a href="#">Nucleotide-binding, alpha-beta plait</a>       | <a href="#">RT</a> |    | 4     | 1.0E0   | 1.0E0     |
| Annotation Cluster 184   |                  | Enrichment Score: 0                                        | <b>G</b>           |  | Count | P_Value | Benjamini |
| <input type="checkbox"/> | UP_KEYWORDS      | <a href="#">Transcription regulation</a>                   | <a href="#">RT</a> |    | 26    | 1.0E0   | 1.0E0     |
| <input type="checkbox"/> | UP_KEYWORDS      | <a href="#">Transcription</a>                              | <a href="#">RT</a> |    | 29    | 1.0E0   | 1.0E0     |
| <input type="checkbox"/> | GOTERM_BP_DIRECT | <a href="#">transcription, DNA-templated</a>               | <a href="#">RT</a> |    | 27    | 1.0E0   | 1.0E0     |
| <input type="checkbox"/> | GOTERM_BP_DIRECT | <a href="#">regulation of transcription, DNA-templated</a> | <a href="#">RT</a> |    | 17    | 1.0E0   | 1.0E0     |
| Annotation Cluster 185   |                  | Enrichment Score: 0                                        | <b>G</b>           |  | Count | P_Value | Benjamini |
| <input type="checkbox"/> | SMART            | <a href="#">RING</a>                                       | <a href="#">RT</a> |    | 3     | 1.0E0   | 1.0E0     |
| <input type="checkbox"/> | INTERPRO         | <a href="#">Zinc finger, RING-type</a>                     | <a href="#">RT</a> |    | 3     | 1.0E0   | 1.0E0     |
| <input type="checkbox"/> | INTERPRO         | <a href="#">Zinc finger, RING/FYVE/PHD-type</a>            | <a href="#">RT</a> |    | 4     | 1.0E0   | 1.0E0     |
| Annotation Cluster 186   |                  | Enrichment Score: 0                                        | <b>G</b>           |  | Count | P_Value | Benjamini |
| <input type="checkbox"/> | KEGG_PATHWAY     | <a href="#">Neuroactive ligand-receptor interaction</a>    | <a href="#">RT</a> |    | 5     | 1.0E0   | 1.0E0     |
| <input type="checkbox"/> | INTERPRO         | <a href="#">G protein-coupled receptor, rhodopsin-like</a> | <a href="#">RT</a> |    | 4     | 1.0E0   | 1.0E0     |
| <input type="checkbox"/> | UP_KEYWORDS      | <a href="#">G-protein coupled receptor</a>                 | <a href="#">RT</a> |    | 5     | 1.0E0   | 1.0E0     |
| <input type="checkbox"/> | INTERPRO         | <a href="#">GPCR, rhodopsin-like, 7TM</a>                  | <a href="#">RT</a> |   | 4     | 1.0E0   | 1.0E0     |

1227 terms were not clustered.
