# Supplementary material for: Protein signatures of seminal plasma from bulls with contrasting frozen-thawed sperm viability
Source: PubMed Central journal article supplement (PMC7474054; doi:10.1038/s41598-020-71015-9), 2020-09-04
Supplement: 41598_2020_71015_MOESM4_ESM.pdf [file 41598_2020_71015_MOESM4_ESM.pdf]

## **Protein Signatures of Seminal Plasma from Bulls with Contrasting Frozen-Thawed Sperm Viability**

Fabio P. Gomes,

Robin Park,

Arabela G. Viana,

Carolina Fernandez-Costa,

Einko Topper,

Abdullah Kaya,

Erdogan Memili,

John R. Yates, III,

Arlindo A. Moura

**Supplemental table 4.** Pearson's correlations (and p-values) among abundances of seminal plasma proteins with the highest VIP scores (as shown in Figure 2). Analyses were carried out using SAS University Edition.

|                      |                                                                                                         |
|----------------------|---------------------------------------------------------------------------------------------------------|
| <b>15 Variables:</b> | P29392 P81019 Q2KJD0 P62157 P00669 Q3MHM5 Q3ZBU7 Q3SX14 Q2KJE5 P00829 Q9BG1 Q32KL7 A0JNP2 Q3ZBD7 Q6B856 |
|----------------------|---------------------------------------------------------------------------------------------------------|

| Pearson Correlation Coefficients, N = 14<br>Prob >  r  under H0: Rho=0 |                    |                    |                    |                    |                    |                    |                    |                    |                    |                    |                    |                    |                    |                    |                    |
|------------------------------------------------------------------------|--------------------|--------------------|--------------------|--------------------|--------------------|--------------------|--------------------|--------------------|--------------------|--------------------|--------------------|--------------------|--------------------|--------------------|--------------------|
|                                                                        | P29392             | P81019             | Q2KJD0             | P62157             | P00669             | Q3MHM5             | Q3ZBU7             | Q3SX14             | Q2KJE5             | P00829             | Q9BG1              | Q32KL7             | A0JNP2             | Q3ZBD7             | Q6B856             |
| <b>P29392</b><br>P29392                                                | 1.00000            | 0.23899<br>0.4106  | 0.77289<br>0.0012  | 0.60219<br>0.0227  | -0.16414<br>0.5750 | 0.72287<br>0.0035  | 0.73463<br>0.0028  | 0.63904<br>0.0139  | 0.74157<br>0.0024  | 0.74314<br>0.0023  | 0.46332<br>0.0952  | 0.67380<br>0.0082  | 0.43593<br>0.1192  | 0.72511<br>0.0033  | 0.69303<br>0.0060  |
| <b>P81019</b><br>P81019                                                | 0.23899<br>0.4106  | 1.00000            | 0.04297<br>0.8840  | -0.04901<br>0.8679 | 0.03190<br>0.9138  | -0.02346<br>0.9365 | 0.00298<br>0.9919  | -0.13836<br>0.6371 | 0.18480<br>0.5271  | 0.07069<br>0.8102  | -0.11780<br>0.6884 | 0.09700<br>0.7415  | -0.02440<br>0.9340 | 0.18156<br>0.5345  | -0.04711<br>0.8729 |
| <b>Q2KJD0</b><br>Q2KJD0                                                | 0.77289<br>0.0012  | 0.04297<br>0.8840  | 1.00000            | 0.72665<br>0.0032  | -0.49218<br>0.0738 | 0.98355<br><.0001  | 0.98804<br><.0001  | 0.58668<br>0.0274  | 0.85922<br><.0001  | 0.88444<br><.0001  | 0.44181<br>0.1137  | 0.73234<br>0.0029  | 0.66091<br>0.0101  | 0.91883<br><.0001  | 0.98049<br><.0001  |
| <b>P62157</b><br>P62157                                                | 0.60219<br>0.0227  | -0.04901<br>0.8679 | 0.72665<br>0.0032  | 1.00000            | -0.44254<br>0.1131 | 0.71793<br>0.0038  | 0.71351<br>0.0042  | 0.44072<br>0.1147  | 0.56115<br>0.0368  | 0.52838<br>0.0521  | 0.45569<br>0.1015  | 0.41244<br>0.1428  | 0.74801<br>0.0021  | 0.70152<br>0.0052  | 0.74426<br>0.0023  |
| <b>P00669</b><br>P00669                                                | -0.16414<br>0.5750 | 0.03190<br>0.9138  | -0.49218<br>0.0738 | -0.44254<br>0.1131 | 1.00000            | -0.49169<br>0.0741 | -0.48041<br>0.0821 | -0.26473<br>0.3604 | -0.38947<br>0.1687 | -0.37171<br>0.1907 | -0.36065<br>0.2052 | -0.25770<br>0.3737 | -0.14580<br>0.6189 | -0.40225<br>0.1539 | -0.51001<br>0.0624 |
| <b>Q3MHM5</b><br>Q3MHM5                                                | 0.72287<br>0.0035  | -0.02346<br>0.9365 | 0.98355<br><.0001  | 0.71793<br>0.0038  | -0.49169<br>0.0741 | 1.00000            | 0.99896<br><.0001  | 0.52390<br>0.0545  | 0.86974<br><.0001  | 0.89685<br><.0001  | 0.47167<br>0.0886  | 0.74676<br>0.0022  | 0.68982<br>0.0063  | 0.92962<br><.0001  | 0.99529<br><.0001  |
| <b>Q3ZBU7</b><br>Q3ZBU7                                                | 0.73463<br>0.0028  | 0.00298<br>0.9919  | 0.98804<br><.0001  | 0.71351<br>0.0042  | -0.48041<br>0.0821 | 0.99896<br><.0001  | 1.00000            | 0.52257<br>0.0552  | 0.87441<br><.0001  | 0.89458<br><.0001  | 0.44308<br>0.1126  | 0.74021<br>0.0025  | 0.69489<br>0.0058  | 0.93012<br><.0001  | 0.99432<br><.0001  |
| <b>Q3SX14</b><br>Q3SX14                                                | 0.63904<br>0.0139  | -0.13836<br>0.6371 | 0.58668<br>0.0274  | 0.44072<br>0.1147  | -0.26473<br>0.3604 | 0.52390<br>0.0545  | 0.52257<br>0.0552  | 1.00000            | 0.26920<br>0.3520  | 0.44828<br>0.1079  | 0.51048<br>0.0622  | 0.33433<br>0.2427  | 0.13388<br>0.6482  | 0.39601<br>0.1610  | 0.50957<br>0.0627  |
| <b>Q2KJE5</b><br>Q2KJE5                                                | 0.74157<br>0.0024  | 0.18480<br>0.5271  | 0.85922<br><.0001  | 0.56115<br>0.0368  | -0.38947<br>0.1687 | 0.86974<br><.0001  | 0.87441<br><.0001  | 0.26920<br>0.3520  | 1.00000            | 0.94917<br><.0001  | 0.41062<br>0.1447  | 0.86997<br><.0001  | 0.49213<br>0.0738  | 0.87043<br><.0001  | 0.83923<br>0.0002  |
| <b>P00829</b><br>P00829                                                | 0.74314<br>0.0023  | 0.07069<br>0.8102  | 0.88444<br><.0001  | 0.52838<br>0.0521  | -0.37171<br>0.1907 | 0.89685<br><.0001  | 0.89458<br><.0001  | 0.44828<br>0.1079  | 0.94917<br><.0001  | 1.00000            | 0.59175<br>0.0258  | 0.94500<br><.0001  | 0.42896<br>0.1259  | 0.89427<br><.0001  | 0.85850<br><.0001  |
| <b>Q9BG1</b><br>Q9BG1                                                  | 0.46332<br>0.0952  | -0.11780<br>0.6884 | 0.44181<br>0.1137  | 0.45569<br>0.1015  | -0.36065<br>0.2052 | 0.47167<br>0.0886  | 0.44308<br>0.1126  | 0.51048<br>0.0622  | 0.41062<br>0.1447  | 0.59175<br>0.0258  | 1.00000            | 0.67418<br>0.0082  | 0.07021<br>0.8115  | 0.52308<br>0.0549  | 0.43863<br>0.1167  |
| <b>Q32KL7</b><br>Q32KL7                                                | 0.67380<br>0.0082  | 0.09700<br>0.7415  | 0.73234<br>0.0029  | 0.41244<br>0.1428  | -0.25770<br>0.3737 | 0.74676<br>0.0022  | 0.74021<br>0.0025  | 0.33433<br>0.2427  | 0.86997<br><.0001  | 0.94500<br><.0001  | 0.67418<br>0.0082  | 1.00000            | 0.29438<br>0.3070  | 0.82830<br>0.0003  | 0.69848<br>0.0055  |
| <b>A0JNP2</b><br>A0JNP2                                                | 0.43593<br>0.1192  | -0.02440<br>0.9340 | 0.66091<br>0.0101  | 0.74801<br>0.0021  | -0.14580<br>0.6189 | 0.68982<br>0.0063  | 0.69489<br>0.0058  | 0.13388<br>0.6482  | 0.49213<br>0.0738  | 0.42896<br>0.1259  | 0.07021<br>0.8115  | 0.29438<br>0.3070  | 1.00000            | 0.72182<br>0.0036  | 0.72131<br>0.0036  |
| <b>Q3ZBD7</b><br>Q3ZBD7                                                | 0.72511<br>0.0033  | 0.18156<br>0.5345  | 0.91883<br><.0001  | 0.70152<br>0.0052  | -0.40225<br>0.1539 | 0.92962<br><.0001  | 0.93012<br><.0001  | 0.39601<br>0.1610  | 0.87043<br><.0001  | 0.89427<br><.0001  | 0.52308<br>0.0549  | 0.82830<br>0.0003  | 0.72182<br>0.0036  | 1.00000            | 0.91329<br><.0001  |
| <b>Q6B856</b><br>Q6B856                                                | 0.69303<br>0.0060  | -0.04711<br>0.8729 | 0.98049<br><.0001  | 0.74426<br>0.0023  | -0.51001<br>0.0624 | 0.99529<br><.0001  | 0.99432<br><.0001  | 0.50957<br>0.0627  | 0.83923<br>0.0002  | 0.85850<br><.0001  | 0.43863<br>0.1167  | 0.69848<br>0.0055  | 0.72131<br>0.0036  | 0.91329<br><.0001  | 1.00000            |
